# Supplementary material for: Identification of sensory hair-cell transcripts by thiouracil-tagging in zebrafish
Source: BMC Genomics. 2015 Oct 23;16:842. doi: 10.1186/s12864-015-2072-5 (PMC4619078; doi:10.1186/s12864-015-2072-5)
Supplement: Additional file 1: Table S1. — TU-tagged versus input RNAseq data from Tg(myo6b:UPRT) transgenic larvae. (XLSX 2308 kb) [file 12864_2015_2072_MOESM1_ESM.xlsx]

## Sheet: Dataset 1 Tg_UPRT TU vs. Input
gene	id	Mean	Mean Input	Mean TU	foldChange	log2FoldChange	pval	padj
OTOF (1 of 2)	ENSDARG00000020581	1757.66	683.511	2831.8	4.14302	2.05068	1.24916e-13	2.72303e-09
TMC2 (2 of 2)	ENSDARG00000033104	110.262	26.5919	193.931	7.29286	2.86648	2.69251e-09	1.95647e-05
pcsk5a	ENSDARG00000067537	453.383	195.007	711.758	3.6499	1.86786	2.38259e-09	1.95647e-05
s100s	ENSDARG00000036773	466.43	204.856	728.003	3.55373	1.82933	3.9817e-09	2.16993e-05
cd164l2	ENSDARG00000096327	169.202	56.1385	282.266	5.02803	2.32999	9.15915e-09	3.9932e-05
slc17a8	ENSDARG00000057728	188.834	66.9722	310.696	4.63918	2.21387	1.43338e-08	5.20771e-05
STRC	ENSDARG00000078845	108.693	29.5466	187.839	6.35739	2.66843	2.21664e-08	6.90292e-05
tekt3	ENSDARG00000045038	95.0618	24.6221	165.501	6.72165	2.74882	4.37616e-08	0.000119245
anxa5a	ENSDARG00000026406	283.931	122.126	445.737	3.64982	1.86782	6.60533e-08	0.000159988
myo1ha	ENSDARG00000061968	79.3696	21.6675	137.072	6.32615	2.66133	5.21451e-07	0.00113671
cabp2b	ENSDARG00000052277	122.664	45.3047	200.023	4.41506	2.14243	1.3027e-06	0.00258159
CR293520.1	ENSDARG00000088059	68.2465	18.7128	117.78	6.29409	2.654	1.94725e-06	0.00326524
baiap2l2	ENSDARG00000060933	74.8006	21.6675	127.934	5.9044	2.56179	1.843e-06	0.00326524
myo15ab	ENSDARG00000078474	116.095	43.335	188.854	4.35801	2.12367	2.39213e-06	0.00372472
si:dkey-229d2.6	ENSDARG00000095684	27.3687	2.95466	51.7827	17.5258	4.13141	3.25131e-06	0.00472501
TMEM27	ENSDARG00000041644	322.337	166.446	478.228	2.87318	1.52265	4.29977e-06	0.00585817
si:rp71-68n21.12	ENSDARG00000077382	88.8783	30.5315	147.225	4.82208	2.26966	4.86478e-06	0.00604114
myo6b	ENSDARG00000042141	544.581	305.315	783.847	2.56734	1.36028	4.98833e-06	0.00604114
si:dkeyp-110e4.11	ENSDARG00000071585	106.495	40.3803	172.609	4.27458	2.09578	5.83813e-06	0.00669817
si:dkey-229d2.7	ENSDARG00000092460	22.3072	1.96977	42.6445	21.6495	4.43626	7.84156e-06	0.0085469
si:dkey-30j22.5	ENSDARG00000093008	275.504	141.824	409.185	2.88517	1.52865	8.43911e-06	0.0087602
CABZ01041804.1	ENSDARG00000071488	526.005	751.468	300.542	0.399941	-1.32214	1.00471e-05	0.00995534
slc20a1a	ENSDARG00000020114	824.476	491.458	1157.49	2.35523	1.23587	1.15507e-05	0.0109476
CD37	ENSDARG00000075515	42.4922	9.84886	75.1356	7.62887	2.93147	1.24172e-05	0.0112784
CR391998.1	ENSDARG00000091817	299.598	159.551	439.645	2.7555	1.46232	1.33945e-05	0.0116795
GPX2	ENSDARG00000089149	48.5386	12.8035	84.2737	6.58208	2.71854	1.5557e-05	0.0130433
si:dkey-22f5.9	ENSDARG00000092044	327.216	179.249	475.182	2.65096	1.40651	1.89213e-05	0.0152765
dnajc5b	ENSDARG00000058147	49.0311	13.7884	84.2737	6.11193	2.61163	2.65856e-05	0.0206978
FAM188B2	ENSDARG00000069867	39.9539	9.84886	70.0589	7.1134	2.83054	3.09086e-05	0.0224592
CABZ01086597.1	ENSDARG00000088304	212.04	109.322	314.757	2.87917	1.52565	3.08073e-05	0.0224592
MYOM2 (2 of 3)	ENSDARG00000089850	1435.93	1955	916.858	0.468981	-1.0924	5.24842e-05	0.0369065
zgc:136908	ENSDARG00000011983	570.548	792.833	348.264	0.439265	-1.18684	5.60798e-05	0.0382026
slc10a2	ENSDARG00000014916	229.58	124.096	335.064	2.70005	1.43299	6.10585e-05	0.0403338
chrna9	ENSDARG00000054680	74.6939	28.5617	120.826	4.23036	2.08078	6.34376e-05	0.0404712
s100t	ENSDARG00000055589	455.718	273.798	637.637	2.32886	1.21962	6.49797e-05	0.0404712
ENSDARG00000091099	ENSDARG00000091099	1707.57	2313.5	1101.65	0.476184	-1.07041	6.74605e-05	0.0408492
lrp2b	ENSDARG00000007906	991.247	639.191	1343.3	2.10157	1.07147	0.000103372	0.0609031
gfi1aa	ENSDARG00000020746	81.2175	33.4861	128.949	3.85082	1.94517	0.000106414	0.0610453
slc5a2	ENSDARG00000002129	219.98	121.141	318.819	2.6318	1.39605	0.000109558	0.0612374
si:ch211-150j10.4	ENSDARG00000079336	61.0781	22.6524	99.5039	4.39265	2.13509	0.000130116	0.0709098
si:ch211-38m6.6	ENSDARG00000076959	83.2178	35.4559	130.98	3.69416	1.88525	0.000145118	0.0771569
foxn4	ENSDARG00000010591	210.395	117.201	303.589	2.59031	1.37313	0.000166919	0.08296
ABHD12B (2 of 2)	ENSDARG00000092071	254.613	146.748	362.479	2.47008	1.30456	0.000169826	0.08296
pvalb8	ENSDARG00000037790	1111.66	731.77	1491.54	2.03827	1.02734	0.000171256	0.08296
hsc70	ENSDARG00000012381	1388.67	1859.46	917.873	0.493622	-1.01852	0.000162118	0.08296
pfkma	ENSDARG00000014179	1302.67	1741.28	864.06	0.496221	-1.01094	0.00018912	0.0896222
cbln10	ENSDARG00000023157	23.7845	4.92443	42.6445	8.65979	3.11433	0.0001997	0.0926224
CU467854.2	ENSDARG00000076996	117.577	177.279	57.8747	0.32646	-1.61502	0.000222355	0.100982
acsbg1	ENSDARG00000062077	241.013	139.854	342.172	2.44664	1.2908	0.000240012	0.106776
ENSDARG00000095217	ENSDARG00000095217	702.213	945.49	458.936	0.485395	-1.04277	0.000260645	0.113636
pnp4a	ENSDARG00000057575	475.583	302.36	648.806	2.14581	1.10152	0.000267545	0.114357
loxhd1b	ENSDARG00000074638	92.7417	43.335	142.148	3.28022	1.71379	0.000303129	0.127075
slc2a11l	ENSDARG00000062873	64.5709	26.5919	102.55	3.85643	1.94727	0.000324316	0.133392
CT583700.1	ENSDARG00000090579	496.124	320.088	672.159	2.09992	1.07033	0.000358324	0.14465
pdzk1ip1l	ENSDARG00000017127	233.936	137.884	329.988	2.39323	1.25896	0.000371868	0.147388
atp1b2b	ENSDARG00000034424	1266.06	858.82	1673.29	1.94836	0.96226	0.000381541	0.148521
dfnb59	ENSDARG00000079945	22.2615	4.92443	39.5985	8.04124	3.00742	0.000393544	0.150506
C5H11orf1	ENSDARG00000090173	19.7383	3.93954	35.5371	9.02062	3.17323	0.000427981	0.160855
MYOM1 (2 of 2)	ENSDARG00000076821	2677.79	3524.91	1830.67	0.519353	-0.945214	0.000435385	0.160864
lhfpl5b	ENSDARG00000056458	17.2152	2.95466	31.4757	10.6529	3.41318	0.000443609	0.161171
FP102191.1	ENSDARG00000026095	45.4317	16.7431	74.1203	4.42693	2.14631	0.000503547	0.168398
dnah9l	ENSDARG00000062630	327.835	204.856	450.814	2.20063	1.13792	0.000482316	0.168398
slc15a2	ENSDARG00000032010	508.11	332.891	683.328	2.05271	1.03753	0.000509853	0.168398
CU633848.1	ENSDARG00000086735	920.909	624.418	1217.4	1.94966	0.96322	0.000507414	0.168398
GPT (3 of 5)	ENSDARG00000055642	199.206	282.662	115.749	0.409497	-1.28807	0.000488156	0.168398
si:ch211-274p24.5	ENSDARG00000060566	149.459	216.675	82.243	0.379569	-1.39757	0.000509326	0.168398
dnah12	ENSDARG00000059987	158.546	88.6397	228.453	2.57732	1.36587	0.000529209	0.16965
AKAP12 (2 of 2)	ENSDARG00000091792	365.992	232.433	499.55	2.14922	1.10381	0.000527546	0.16965
si:ch73-29c22.2	ENSDARG00000094253	19.2307	3.93954	34.5218	8.76289	3.13141	0.000544947	0.169704
KNCN	ENSDARG00000095506	23.7693	5.90931	41.6292	7.04467	2.81653	0.000541443	0.169704
atoh1a	ENSDARG00000055294	25.7847	6.8942	44.6752	6.48012	2.69602	0.000571849	0.173056
slc26a6l	ENSDARG00000054127	212.796	126.065	299.527	2.37597	1.24851	0.000566898	0.173056
pygma	ENSDARG00000055518	929.879	1226.18	633.576	0.516706	-0.952584	0.000579525	0.173056
ptprq	ENSDARG00000008849	114.82	60.078	169.563	2.82238	1.49691	0.000629683	0.183636
ryr3	ENSDARG00000071331	4633.01	6107.28	3158.74	0.51721	-0.951179	0.000631805	0.183636
si:ch211-163l21.8	ENSDARG00000042899	184.148	107.353	260.944	2.43072	1.28138	0.000671257	0.192536
PPP1R37 (3 of 3)	ENSDARG00000089780	18.723	3.93954	33.5064	8.50515	3.08834	0.000694611	0.194126
PTPLA	ENSDARG00000022633	514.303	687.45	341.156	0.496263	-1.01082	0.000691645	0.194126
lrrc4bb	ENSDARG00000014792	352.538	478.654	226.422	0.473039	-1.07997	0.000763338	0.210633
si:dkey-205h13.2	ENSDARG00000089429	1039.53	1358.16	720.896	0.53079	-0.913788	0.000857647	0.233698
CABZ01090749.1	ENSDARG00000090155	20.2308	4.92443	35.5371	7.21649	2.8513	0.000982508	0.262553
slc25a27	ENSDARG00000042873	49.9398	20.6826	79.197	3.82916	1.93703	0.00102376	0.262553
wu:fc26g07	ENSDARG00000086988	95.6964	49.2443	142.148	2.8866	1.52937	0.00102085	0.262553
espn	ENSDARG00000076414	627.966	428.425	827.507	1.93151	0.949728	0.00101194	0.262553
aglb	ENSDARG00000016491	1405.46	1824.01	986.916	0.54107	-0.886113	0.00099586	0.262553
cryabb	ENSDARG00000052447	24.2617	6.8942	41.6292	6.03829	2.59414	0.00106567	0.270123
zgc:101040	ENSDARG00000005176	130.36	72.8815	187.839	2.57732	1.36587	0.00109534	0.272383
gabra1	ENSDARG00000068989	307.792	417.592	197.993	0.47413	-1.07665	0.00111207	0.272383
ENSDARG00000069563	ENSDARG00000069563	24.7288	42.3501	7.10742	0.167825	-2.57497	0.00110704	0.272383
nmnat2	ENSDARG00000004580	379.481	509.186	249.775	0.490538	-1.02756	0.00113828	0.275703
RBBP6 (26 of 71)	ENSDARG00000091883	10.3565	19.6977	1.01535	0.0515464	-4.27798	0.00120009	0.287481
TMBIM1 (2 of 2)	ENSDARG00000090534	29.8004	9.84886	49.752	5.05155	2.33673	0.00122608	0.290514
dusp19	ENSDARG00000040490	27.7849	8.86397	46.7059	5.26919	2.39758	0.00127188	0.294954
gad1b	ENSDARG00000027419	1171.61	1516.72	826.492	0.544919	-0.875886	0.00126511	0.294954
myom1a	ENSDARG00000061249	3548.18	4592.52	2503.84	0.5452	-0.875142	0.00129786	0.297811
GRXCR2	ENSDARG00000053692	12.6614	1.96977	23.353	11.8557	3.56751	0.00131506	0.298615
casq1b	ENSDARG00000018105	792.762	1032.16	553.364	0.536122	-0.899367	0.00136251	0.306199
GIPC3	ENSDARG00000053074	56.9711	25.607	88.3351	3.44964	1.78645	0.0014147	0.314685
TEKT4	ENSDARG00000028899	36.3392	13.7884	58.8901	4.27099	2.09457	0.00159949	0.323133
ODF3L2 (1 of 2)	ENSDARG00000014209	54.9556	24.6221	85.2891	3.46392	1.7924	0.00156151	0.323133
rgs1	ENSDARG00000089077	59.9867	27.5768	92.3965	3.35052	1.74438	0.00148682	0.323133
CR382281.1	ENSDARG00000091803	94.6658	50.2292	139.102	2.76936	1.46955	0.00161891	0.323133
cda	ENSDARG00000038199	185.58	113.262	257.898	2.27701	1.18714	0.00154222	0.323133
TECPR1 (2 of 2)	ENSDARG00000074086	209.182	130.005	288.358	2.21806	1.1493	0.00153425	0.323133
tdo2b	ENSDARG00000023176	236.291	149.703	322.88	2.15681	1.1089	0.00159758	0.323133
cacna1sb	ENSDARG00000042552	1205.07	1552.18	857.968	0.55275	-0.855301	0.00160757	0.323133
casq2	ENSDARG00000008982	1031.29	1332.55	730.034	0.547847	-0.868155	0.00153589	0.323133
ryr1b	ENSDARG00000023797	3767.29	4868.29	2666.3	0.547687	-0.868577	0.00147456	0.323133
cand2	ENSDARG00000005749	469.171	618.508	319.834	0.517106	-0.951469	0.00163056	0.323133
porcn	ENSDARG00000052558	115.206	166.446	63.9668	0.38431	-1.37966	0.0015579	0.323133
dbx1a	ENSDARG00000086393	88.6346	46.2896	130.98	2.82957	1.50058	0.00165953	0.325215
hhatla	ENSDARG00000039051	1442.08	1852.57	1031.59	0.556844	-0.844656	0.00167091	0.325215
tram1	ENSDARG00000019137	769.379	541.687	997.07	1.84067	0.880235	0.00176922	0.341303
si:ch211-113e8.6	ENSDARG00000074610	16.6923	3.93954	29.445	7.47423	2.90192	0.00185393	0.345417
pou4f3	ENSDARG00000006206	68.5257	33.4861	103.565	3.09278	1.62891	0.00182521	0.345417
sqlea	ENSDARG00000079946	196.612	122.126	271.097	2.21982	1.15044	0.00180906	0.345417
sema4aa	ENSDARG00000077103	12.3415	22.6524	2.03069	0.0896459	-3.47962	0.00184267	0.345417
ca4b	ENSDARG00000042293	178.026	109.322	246.729	2.2569	1.17434	0.00194659	0.355854
cpb2	ENSDARG00000037144	189.073	117.201	260.944	2.22646	1.15475	0.00194426	0.355854
pcnxl2	ENSDARG00000055698	381.064	505.246	256.883	0.50843	-0.975878	0.00195892	0.355854
angptl3	ENSDARG00000044365	530.914	368.347	693.481	1.88268	0.912791	0.00202318	0.358749
fgf11b	ENSDARG00000043907	175.447	243.267	107.627	0.442422	-1.1765	0.00201501	0.358749
slc6a1l	ENSDARG00000041205	98.8033	143.793	53.8133	0.374241	-1.41796	0.00202423	0.358749
nell2b	ENSDARG00000062797	895.469	1153.3	637.637	0.55288	-0.854961	0.00204439	0.359401
slc5a12	ENSDARG00000005004	264.371	172.355	356.387	2.06775	1.04806	0.0021397	0.370184
mybpha	ENSDARG00000058799	413.454	544.642	282.266	0.51826	-0.948251	0.00213747	0.370184
CU855686.1	ENSDARG00000025335	43.8782	18.7128	69.0435	3.68964	1.88348	0.00217224	0.372855
atp6v0a1b	ENSDARG00000015174	1093.69	1401.49	785.878	0.560744	-0.834587	0.00221216	0.376742
dvr1	ENSDARG00000037995	43.1167	67.9571	18.2762	0.268938	-1.89466	0.00224873	0.38
osbpl1a	ENSDARG00000011281	322.591	215.69	429.491	1.99124	0.99367	0.00230244	0.383136
myoz1b	ENSDARG00000071445	909.456	1168.07	650.837	0.557188	-0.843764	0.00230207	0.383136
CR792456.1	ENSDARG00000022101	1475.64	1882.12	1069.16	0.568062	-0.815879	0.00236402	0.387468
cdnf	ENSDARG00000075501	105.281	151.672	58.8901	0.388272	-1.36486	0.00236357	0.387468
cx28.9	ENSDARG00000041797	494.235	343.725	644.745	1.87576	0.907473	0.002407	0.389378
tgm2a	ENSDARG00000070157	322.839	429.41	216.269	0.503641	-0.989531	0.00241139	0.389378
RAB1B	ENSDARG00000033056	18.2001	4.92443	31.4757	6.39175	2.67621	0.00248369	0.394639
hcn3	ENSDARG00000027192	126.284	73.8664	178.701	2.41924	1.27456	0.00248355	0.394639
lcn15	ENSDARG00000067851	247.785	161.521	334.049	2.06814	1.04834	0.00249829	0.394639
nme4	ENSDARG00000088390	67.0027	33.4861	100.519	3.00182	1.58584	0.00254151	0.398578
glulc	ENSDARG00000013227	44.8783	19.6977	70.0589	3.5567	1.83054	0.00260314	0.405198
ccnd1	ENSDARG00000035750	1358.5	986.856	1730.15	1.75319	0.809986	0.00262089	0.405198
mapk8ip2	ENSDARG00000063157	501.144	651.994	350.294	0.537266	-0.896292	0.00267026	0.409923
slc6a13l	ENSDARG00000001354	230.707	149.703	311.711	2.0822	1.05811	0.00272036	0.411814
SLC4A5 (1 of 2)	ENSDARG00000002771	195.388	266.904	123.872	0.464108	-1.10747	0.0027089	0.411814
NRAP	ENSDARG00000009341	1839.22	2336.15	1342.29	0.574573	-0.799438	0.00274391	0.412514
msmo1	ENSDARG00000055876	546.901	385.09	708.712	1.84038	0.880002	0.0027794	0.414987
twf2b	ENSDARG00000009727	107.19	61.0629	153.317	2.51081	1.32815	0.00284277	0.421562
pla2g1b	ENSDARG00000009153	472.111	329.937	614.284	1.86182	0.896717	0.0029114	0.428821
si:dkey-45d16.4	ENSDARG00000096421	394.589	517.065	272.113	0.526264	-0.926141	0.00294025	0.430165
ENSDARG00000078211	ENSDARG00000078211	21.7233	6.8942	36.5525	5.30191	2.40651	0.00302981	0.434518
dab2	ENSDARG00000031761	721.53	517.065	925.996	1.79087	0.84066	0.00301233	0.434518
si:dkey-253d23.5	ENSDARG00000058566	13.8341	24.6221	3.04604	0.123711	-3.01495	0.00301892	0.434518
SPEF1	ENSDARG00000022007	17.6924	4.92443	30.4604	6.18557	2.62891	0.00313808	0.441016
ATP6V1C2	ENSDARG00000070440	19.7079	5.90931	33.5064	5.6701	2.50337	0.00311908	0.441016
rltgr	ENSDARG00000096533	437.97	305.315	570.625	1.86897	0.902245	0.0031119	0.441016
mybpc2b	ENSDARG00000021265	760.662	974.052	547.272	0.56185	-0.831742	0.00315604	0.441016
smyd1a	ENSDARG00000009280	1265.66	1606.35	924.98	0.575828	-0.79629	0.0031992	0.4442
ACBD3 (1 of 2)	ENSDARG00000024602	142.331	86.6699	197.993	2.28444	1.19184	0.00323884	0.446858
atp6v1b2	ENSDARG00000043465	943.952	1202.55	685.359	0.569923	-0.81116	0.00326452	0.447568
DPEP1	ENSDARG00000068181	379.242	261.98	496.504	1.8952	0.922352	0.00340297	0.463633
BX571714.1	ENSDARG00000027196	43.863	19.6977	68.0282	3.45361	1.7881	0.0034433	0.466214
abcg2d	ENSDARG00000016818	38.8319	16.7431	60.9208	3.63857	1.86337	0.00358617	0.482561
CABZ01072159.1	ENSDARG00000087627	13.1538	2.95466	23.353	7.90378	2.98254	0.00367921	0.486063
efcab2	ENSDARG00000074323	13.1538	2.95466	23.353	7.90378	2.98254	0.00367921	0.486063
si:ch211-218o21.4	ENSDARG00000079869	26.7544	9.84886	43.6599	4.43299	2.14828	0.00371445	0.486063
si:dkey-11p23.9	ENSDARG00000087679	63.4642	32.5012	94.4272	2.90534	1.53871	0.00394437	0.486063
slc16a7	ENSDARG00000021573	105.159	61.0629	149.256	2.4443	1.28942	0.00394277	0.486063
mus81	ENSDARG00000069326	112.191	65.9873	158.394	2.40037	1.26326	0.00388614	0.486063
slc22a6l	ENSDARG00000055523	352.117	243.267	460.967	1.8949	0.922125	0.00391189	0.486063
f5	ENSDARG00000055705	804.246	585.022	1023.47	1.74945	0.806904	0.00393682	0.486063
aspm	ENSDARG00000071442	1081.76	793.818	1369.7	1.72546	0.786982	0.00389762	0.486063
fbln1	ENSDARG00000029738	427.517	554.491	300.542	0.542015	-0.883594	0.00394665	0.486063
hbz	ENSDARG00000045142	394.635	514.11	275.159	0.535213	-0.901814	0.00376429	0.486063
disp2	ENSDARG00000042846	271.615	360.468	182.762	0.507014	-0.979903	0.0038384	0.486063
ANKRD13D	ENSDARG00000076835	232.271	311.224	153.317	0.492627	-1.02143	0.00374568	0.486063
rgs7bpb	ENSDARG00000016742	99.3415	141.824	56.8594	0.400916	-1.31863	0.00390181	0.486063
cyp2aa9	ENSDARG00000070020	68.4902	101.443	35.5371	0.350315	-1.51327	0.00367855	0.486063
shisa9	ENSDARG00000045145	93.3712	133.944	52.798	0.394178	-1.34308	0.00401532	0.491741
abcb11b	ENSDARG00000070078	733.979	532.823	935.134	1.75505	0.811516	0.00409579	0.496023
chat	ENSDARG00000015854	242.241	323.043	161.44	0.499749	-1.00073	0.00408896	0.496023
adamts13	ENSDARG00000076270	439.416	310.239	568.594	1.83276	0.874018	0.00414193	0.49843
si:dkeyp-115a10.3	ENSDARG00000094340	57.0574	85.6851	28.4297	0.331793	-1.59165	0.0041614	0.49843
serpini1	ENSDARG00000034168	142.656	196.977	88.3351	0.448454	-1.15697	0.00424277	0.5054
cubn	ENSDARG00000087013	213.583	140.839	286.328	2.03302	1.02362	0.00442819	0.509336
PRODH2	ENSDARG00000021154	323.992	223.569	424.415	1.89836	0.924754	0.00446273	0.509336
slc6a19b	ENSDARG00000056719	497.113	354.559	639.668	1.80412	0.851298	0.00433724	0.509336
FP016199.1	ENSDARG00000074570	542.271	389.03	695.512	1.78781	0.838195	0.00440621	0.509336
casq1a	ENSDARG00000038716	1415.26	1781.66	1048.85	0.588695	-0.764409	0.00442426	0.509336
gpib	ENSDARG00000005161	523.177	671.692	374.663	0.557789	-0.842208	0.00445293	0.509336
hbbe2	ENSDARG00000045143	383.202	498.352	268.051	0.537875	-0.894656	0.00442017	0.509336
dpp6a	ENSDARG00000076826	240.256	320.088	160.425	0.50119	-0.996572	0.00432035	0.509336
gyg1b	ENSDARG00000059391	816.069	1035.11	597.024	0.57677	-0.793931	0.00449926	0.51083
dhrs11b	ENSDARG00000031299	237.17	158.567	315.773	1.99142	0.993797	0.0045238	0.510955
ENSDARG00000078922	ENSDARG00000078922	12.6461	2.95466	22.3376	7.56014	2.91841	0.00483176	0.514017
si:ch73-124g13.6	ENSDARG00000095655	20.708	6.8942	34.5218	5.00736	2.32405	0.00461293	0.514017
RIBC2	ENSDARG00000075177	31.2777	12.8035	49.752	3.8858	1.95821	0.00471518	0.514017
tmigd1	ENSDARG00000007040	37.8166	16.7431	58.8901	3.51728	1.81446	0.00483387	0.514017
FMNL1 (2 of 2)	ENSDARG00000075519	37.8166	16.7431	58.8901	3.51728	1.81446	0.00483387	0.514017
AL929092.1	ENSDARG00000054572	45.8632	21.6675	70.0589	3.23336	1.69304	0.00472422	0.514017
si:ch211-142h2.1	ENSDARG00000093205	47.371	22.6524	72.0896	3.18243	1.67013	0.00479068	0.514017
BX005356.2	ENSDARG00000077880	138.285	85.6851	190.885	2.22775	1.15559	0.004623	0.514017
ENDOU	ENSDARG00000044204	210.06	138.869	281.251	2.0253	1.01813	0.00481964	0.514017
gria2b	ENSDARG00000052765	755.306	959.279	551.333	0.574737	-0.799026	0.00457777	0.514017
CNDP1	ENSDARG00000069583	522.193	669.722	374.663	0.55943	-0.837971	0.00466601	0.514017
tac3a	ENSDARG00000093089	58.0575	86.6699	29.445	0.339738	-1.55751	0.00473108	0.514017
cyp2ad2	ENSDARG00000021172	1059.57	783.969	1335.18	1.7031	0.768166	0.00489349	0.515579
clic5a	ENSDARG00000075993	152.627	208.796	96.4579	0.461972	-1.11412	0.00489586	0.515579
TMC2 (1 of 2)	ENSDARG00000030311	99.6207	58.1083	141.133	2.4288	1.28024	0.00492029	0.51566
wdr65	ENSDARG00000058090	113.176	67.9571	158.394	2.33079	1.22082	0.00508111	0.518517
SLC16A13	ENSDARG00000055342	356.087	249.176	462.998	1.85811	0.89384	0.00503856	0.518517
gad2	ENSDARG00000015537	1320.21	1657.56	982.855	0.592952	-0.754013	0.00512205	0.518517
SPEG (1 of 2)	ENSDARG00000009567	1014.38	1277.4	751.356	0.588193	-0.765638	0.00519019	0.518517
grin1b	ENSDARG00000025728	1029.81	1297.09	762.525	0.587872	-0.766427	0.00509315	0.518517
BX296557.4	ENSDARG00000088313	942.15	1187.77	696.527	0.586415	-0.770006	0.00520919	0.518517
pgam2	ENSDARG00000057571	631.809	803.667	459.952	0.572317	-0.805115	0.00518556	0.518517
kbtbd12	ENSDARG00000001882	257.213	339.786	174.64	0.51397	-0.960244	0.00514205	0.518517
pvalb3	ENSDARG00000022817	155.12	211.75	98.4886	0.465116	-1.10434	0.00505837	0.518517
MFAP4 (4 of 13)	ENSDARG00000088745	53.0874	79.7757	26.399	0.330915	-1.59547	0.00505564	0.518517
si:dkey-14o6.8	ENSDARG00000095985	12.8492	22.6524	3.04604	0.134469	-2.89466	0.00506385	0.518517
C11H3orf83 (2 of 2)	ENSDARG00000089374	22.2158	7.87909	36.5525	4.63918	2.21387	0.0052863	0.52143
MAATS1	ENSDARG00000006292	69.4801	37.4257	101.535	2.71297	1.43987	0.00527141	0.52143
ccnb2	ENSDARG00000036180	43.8477	20.6826	67.0128	3.24006	1.69602	0.00531931	0.522323
syt2a	ENSDARG00000025206	328.947	428.425	229.468	0.535608	-0.900749	0.00546588	0.534308
CR387932.1	ENSDARG00000054136	30.7701	12.8035	48.7366	3.8065	1.92847	0.00556903	0.541961
rac3a	ENSDARG00000090062	246.765	325.997	167.532	0.513907	-0.960422	0.00559608	0.542173
CABZ01065246.1	ENSDARG00000088253	89.0662	51.2141	126.918	2.47819	1.30929	0.0056393	0.543943
si:busm1-118j2.5	ENSDARG00000090689	366.814	474.715	258.913	0.545408	-0.874593	0.00578027	0.555084
kmo	ENSDARG00000009160	502.561	363.423	641.699	1.76571	0.820247	0.00587404	0.556731
cplx4a	ENSDARG00000059978	689.207	506.231	872.182	1.72289	0.784833	0.00583473	0.556731
zgc:194125	ENSDARG00000078342	113.805	158.567	69.0435	0.435423	-1.19951	0.00584953	0.556731
KIAA0319	ENSDARG00000074486	171.568	231.448	111.688	0.482562	-1.05121	0.00593902	0.558899
MAP1S (1 of 2)	ENSDARG00000060326	166.09	224.554	107.627	0.479291	-1.06103	0.00594819	0.558899
CU306817.2	ENSDARG00000057903	444.041	569.264	318.819	0.560054	-0.836362	0.00597405	0.55892
traip	ENSDARG00000011262	55.4024	28.5617	82.243	2.87949	1.52581	0.00626263	0.565228
ENSDARG00000027609	ENSDARG00000027609	80.0194	45.3047	114.734	2.5325	1.34056	0.00630076	0.565228
si:ch211-170d8.5	ENSDARG00000046142	214.045	143.793	284.297	1.97712	0.983402	0.00618065	0.565228
CRISP3	ENSDARG00000091103	426.786	306.299	547.272	1.78672	0.837314	0.00625363	0.565228
rrm2	ENSDARG00000078069	500.038	362.438	637.637	1.7593	0.815002	0.00623523	0.565228
CNGB3 (2 of 2)	ENSDARG00000087082	514.593	373.272	655.914	1.7572	0.81328	0.00610888	0.565228
si:ch211-233a1.4	ENSDARG00000092752	873.314	649.04	1097.59	1.6911	0.75796	0.00628461	0.565228
stxbp5a	ENSDARG00000002656	365.829	472.745	258.913	0.54768	-0.868594	0.00614584	0.565228
mcf2lb	ENSDARG00000076480	245.78	324.027	167.532	0.517031	-0.951678	0.00608523	0.565228
si:ch211-188i4.4	ENSDARG00000092456	31.2219	49.2443	13.1995	0.268041	-1.89947	0.00613568	0.565228
AL772263.1	ENSDARG00000071165	16.1694	4.92443	27.4143	5.56701	2.4769	0.00636075	0.568271
frem1a	ENSDARG00000069473	409.682	525.929	293.435	0.557937	-0.841827	0.00639569	0.56906
CR847973.1	ENSDARG00000075433	3929.42	4922.46	2936.38	0.596527	-0.74534	0.00642349	0.56921
TUBB8P7 (3 of 3)	ENSDARG00000091444	457.012	584.037	329.988	0.565011	-0.823649	0.0064965	0.573349
ENSDARG00000092890	ENSDARG00000092890	114.16	69.9269	158.394	2.26514	1.1796	0.00656591	0.573414
AGAP2	ENSDARG00000061117	360.859	465.851	255.867	0.549247	-0.864473	0.00653509	0.573414
RGS14 (2 of 2)	ENSDARG00000060200	12.3568	21.6675	3.04604	0.140581	-2.83053	0.00657615	0.573414
CELA1 (3 of 7)	ENSDARG00000043171	785.492	583.052	987.932	1.69441	0.760786	0.00665569	0.575744
MYOM3	ENSDARG00000059838	1438.92	1794.46	1083.37	0.603732	-0.728019	0.00664833	0.575744
TMPRSS7	ENSDARG00000086161	63.9414	34.471	93.4118	2.70987	1.43822	0.00669202	0.576598
g2e3	ENSDARG00000001313	193.459	129.02	257.898	1.9989	0.999205	0.00676611	0.5781
ttnb	ENSDARG00000000563	14473.9	18870.4	10077.3	0.534027	-0.905015	0.00681553	0.5781
HIVEP2 (1 of 2)	ENSDARG00000018773	87.4315	124.096	50.7673	0.409098	-1.28948	0.00678964	0.5781
lingo2	ENSDARG00000069970	65.5355	95.5339	35.5371	0.371984	-1.42669	0.0067654	0.5781
wdr96	ENSDARG00000001825	59.4181	31.5163	87.3198	2.77062	1.47021	0.00688757	0.581946
DCSTAMP	ENSDARG00000078347	70.9727	39.3954	102.55	2.60309	1.38023	0.00695421	0.583057
faimb	ENSDARG00000020814	170.873	112.277	229.468	2.04377	1.03123	0.00694294	0.583057
GPRIN3	ENSDARG00000075043	179.554	240.312	118.796	0.494338	-1.01643	0.00701285	0.585721
sgca	ENSDARG00000074156	286.647	373.272	200.023	0.535865	-0.900059	0.00707614	0.586513
si:ch211-56a11.2	ENSDARG00000093677	40.6697	62.0478	19.2916	0.310915	-1.68541	0.00705708	0.586513
si:dkey-162h11.3	ENSDARG00000088432	320.9	226.524	415.277	1.83326	0.87441	0.00723887	0.59133
kif23	ENSDARG00000014943	341.471	242.282	440.66	1.81879	0.86298	0.00722972	0.59133
msi1	ENSDARG00000010710	773.922	576.158	971.686	1.68649	0.754026	0.00724277	0.59133
klhl31	ENSDARG00000039066	1373.71	1710.75	1036.67	0.605974	-0.722672	0.00716517	0.59133
ttll6	ENSDARG00000054023	64.9415	35.4559	94.4272	2.66323	1.41318	0.00734615	0.597532
ncapg	ENSDARG00000070109	546.15	400.849	691.451	1.72497	0.786569	0.00742363	0.60159
ampd1	ENSDARG00000033832	2880.48	3582.03	2178.93	0.608296	-0.717156	0.00754456	0.608551
tnr	ENSDARG00000020771	501.388	636.236	366.54	0.576107	-0.795592	0.00756536	0.608551
hrasb	ENSDARG00000005651	241.825	317.133	166.517	0.525069	-0.929422	0.00759509	0.608696
sema7a	ENSDARG00000078707	328.916	233.418	424.415	1.81826	0.862559	0.00772675	0.612776
lamb2	ENSDARG00000002084	1422.58	1767.87	1077.28	0.609367	-0.714616	0.00773774	0.612776
grin1a	ENSDARG00000027828	1247.72	1552.18	943.257	0.607698	-0.718574	0.00778466	0.612776
FNDC7 (1 of 7)	ENSDARG00000075676	1127.65	1404.45	850.86	0.605833	-0.723008	0.00778654	0.612776
PCDHAC1	ENSDARG00000077023	184.047	245.237	122.857	0.500973	-0.997195	0.00771458	0.612776
spata18	ENSDARG00000052343	98.0824	59.0931	137.072	2.31959	1.21387	0.00786121	0.614217
lrrtm1	ENSDARG00000052713	313.067	404.788	221.345	0.546818	-0.870867	0.00783518	0.614217
dnah5	ENSDARG00000087373	151.287	98.4886	204.085	2.07216	1.05114	0.00793927	0.614693
prnpa	ENSDARG00000026229	288.775	202.886	374.663	1.84666	0.88492	0.00793482	0.614693
INCENP	ENSDARG00000077270	549.642	404.788	694.497	1.7157	0.778801	0.00796357	0.614693
CABZ01018247.1	ENSDARG00000060263	162.136	217.66	106.611	0.489807	-1.02971	0.00798009	0.614693
C5H9orf171	ENSDARG00000068122	43.8325	21.6675	65.9975	3.04592	1.60688	0.00802142	0.6157
tdo2a	ENSDARG00000071429	1100.47	831.244	1369.7	1.64777	0.720519	0.00808951	0.618748
BX957362.1	ENSDARG00000052074	372.551	267.889	477.213	1.78138	0.832997	0.00828794	0.629508
eef2l2	ENSDARG00000035256	2989.17	3710.06	2268.28	0.611386	-0.709843	0.00827619	0.629508
BX530062.1	ENSDARG00000070073	13.6463	3.93954	23.353	5.92784	2.56751	0.00838149	0.633115
SLC22A7 (4 of 5)	ENSDARG00000062182	326.393	232.433	420.353	1.80849	0.854787	0.00839352	0.633115
CR450701.1	ENSDARG00000088628	128.193	81.7455	174.64	2.13638	1.09517	0.00865999	0.643538
cdk1	ENSDARG00000087554	339.933	243.267	436.599	1.79473	0.843769	0.00867334	0.643538
sv2ba	ENSDARG00000057427	1438.07	1094.21	1781.93	1.62851	0.703556	0.00868976	0.643538
ache	ENSDARG00000031796	1651.83	2044.62	1259.03	0.615776	-0.699523	0.00879575	0.643538
gria3a	ENSDARG00000032737	843.225	1051.86	634.591	0.603305	-0.72904	0.00879739	0.643538
myoz1a	ENSDARG00000056209	622.991	782.984	462.998	0.591325	-0.757978	0.00857263	0.643538
frem3	ENSDARG00000074677	608.05	764.271	451.829	0.591189	-0.758308	0.00876339	0.643538
CR388231.1	ENSDARG00000076443	101.387	140.839	61.9361	0.439766	-1.18519	0.00872743	0.643538
si:dkey-11p10.11	ENSDARG00000096452	23.2819	37.4257	9.13812	0.244167	-2.03406	0.00860425	0.643538
IL12B (3 of 3)	ENSDARG00000069504	41.817	20.6826	62.9515	3.04369	1.60582	0.00912193	0.651963
si:dkey-277m11.2	ENSDARG00000094879	41.817	20.6826	62.9515	3.04369	1.60582	0.00912193	0.651963
cdk6	ENSDARG00000070228	376.044	271.828	480.259	1.76677	0.821115	0.00911506	0.651963
mipa	ENSDARG00000037285	608.802	453.047	764.556	1.68758	0.754959	0.00902667	0.651963
rad21b	ENSDARG00000035655	299.141	386.075	212.207	0.549653	-0.863407	0.00904575	0.651963
GRM8 (1 of 2)	ENSDARG00000076508	218.436	286.602	150.271	0.524321	-0.931479	0.00911351	0.651963
dkk3b	ENSDARG00000070683	67.0433	96.5188	37.5678	0.389228	-1.36131	0.00905981	0.651963
haao	ENSDARG00000076487	967.97	732.755	1203.19	1.642	0.715456	0.00920104	0.655469
si:ch211-270n8.3	ENSDARG00000093646	24.216	9.84886	38.5832	3.91753	1.96994	0.0093377	0.656621
hnf1ba	ENSDARG00000006615	387.075	280.692	493.458	1.758	0.813938	0.00933056	0.656621
zgc:92113	ENSDARG00000013749	339.501	435.32	243.683	0.55978	-0.837069	0.00926829	0.656621
SPIRE1 (2 of 3)	ENSDARG00000038445	21.2969	34.471	8.12277	0.235641	-2.08534	0.00928788	0.656621
scn1lab	ENSDARG00000062744	423.714	537.748	309.681	0.575885	-0.796148	0.00940811	0.659445
EPS8L2 (2 of 2)	ENSDARG00000069011	56.3872	30.5315	82.243	2.69371	1.4296	0.00970679	0.659974
GOLT1A	ENSDARG00000088933	95.5593	58.1083	133.01	2.28901	1.19472	0.00946356	0.659974
ak7a	ENSDARG00000019001	118.146	74.8513	161.44	2.15681	1.1089	0.00963681	0.659974
cfhl1	ENSDARG00000056771	145.748	95.5339	195.962	2.05123	1.03649	0.00961988	0.659974
cenpf	ENSDARG00000055133	629.85	470.775	788.924	1.6758	0.744847	0.00964694	0.659974
hmgcra	ENSDARG00000052734	1360.74	1039.05	1682.43	1.61919	0.695274	0.00966928	0.659974
astn1	ENSDARG00000068323	697.771	871.624	523.919	0.601083	-0.734363	0.00974869	0.659974
csmd2	ENSDARG00000001559	570.213	716.012	424.415	0.592748	-0.754509	0.00974638	0.659974
BTBD17 (2 of 2)	ENSDARG00000077868	312.605	401.833	223.376	0.555892	-0.847122	0.00968623	0.659974
trpc1	ENSDARG00000061203	244.348	318.118	170.578	0.53621	-0.89913	0.00957918	0.659974
CABZ01016567.1	ENSDARG00000040633	92.432	129.02	55.844	0.432832	-1.20812	0.0095873	0.659974
SEMA7A (1 of 3)	ENSDARG00000070442	434.685	550.551	318.819	0.57909	-0.78814	0.0097957	0.661103
dpys	ENSDARG00000079543	890.687	674.647	1106.73	1.64045	0.714096	0.00985883	0.66331
fryb	ENSDARG00000056001	1433.7	1770.82	1096.57	0.619245	-0.691418	0.00992417	0.665652
CABZ01080134.1	ENSDARG00000079971	19.3119	31.5163	7.10742	0.225515	-2.1487	0.00996294	0.666203
umodl1	ENSDARG00000068923	50.3561	26.5919	74.1203	2.78732	1.47888	0.0101447	0.676283
rtn4rl2b	ENSDARG00000037495	81.4968	48.2594	114.734	2.37745	1.24941	0.0102005	0.677438
CNTNAP5	ENSDARG00000073802	135.762	183.189	88.3351	0.482208	-1.05227	0.0102242	0.677438
slc8a2a	ENSDARG00000008912	74.4655	43.335	105.596	2.43674	1.28495	0.0104365	0.686521
cx32.3	ENSDARG00000041787	409.616	300.39	518.842	1.72723	0.788457	0.0105502	0.686521
dla	ENSDARG00000010791	436.203	321.073	551.333	1.71716	0.780024	0.0104851	0.686521
RBM47	ENSDARG00000061985	1364.2	1044.96	1683.44	1.61101	0.687963	0.0104442	0.686521
rtn2b	ENSDARG00000057027	295.679	380.166	211.192	0.555526	-0.848074	0.0105287	0.686521
cul5b	ENSDARG00000004260	39.1924	59.0931	19.2916	0.32646	-1.61502	0.0105392	0.686521
plcd4a	ENSDARG00000057975	72.9577	42.3501	103.565	2.44546	1.2901	0.0106647	0.6895
trim101	ENSDARG00000018264	240.378	312.209	168.547	0.539855	-0.889356	0.0106909	0.6895
TRHDE (1 of 2)	ENSDARG00000062013	136.762	184.174	89.3505	0.485143	-1.04352	0.0106754	0.6895
ttna	ENSDARG00000028213	16300.9	21106.1	11495.7	0.544665	-0.87656	0.0107334	0.690202
zgc:86725	ENSDARG00000079111	862.242	1069.59	654.898	0.612291	-0.70771	0.0107892	0.691744
wdr27	ENSDARG00000053386	11.1231	2.95466	19.2916	6.52921	2.70691	0.0110822	0.699565
si:ch211-71m22.5	ENSDARG00000091266	23.7083	9.84886	37.5678	3.81443	1.93147	0.0112242	0.699565
si:dkeyp-79f4.1	ENSDARG00000094023	62.9108	35.4559	90.3658	2.54868	1.34975	0.0111083	0.699565
ddrgk1	ENSDARG00000075690	179.351	122.126	236.576	1.93715	0.953933	0.0112371	0.699565
vezf1a	ENSDARG00000008247	628.296	472.745	783.847	1.65808	0.72951	0.0112562	0.699565
MKI67	ENSDARG00000091150	1712.31	1317.78	2106.84	1.59879	0.676977	0.0111345	0.699565
mapk8ip3	ENSDARG00000062531	973.382	1203.53	743.233	0.617544	-0.695385	0.0113186	0.699565
gria3b	ENSDARG00000037498	635.531	792.833	478.228	0.603189	-0.729318	0.0111808	0.699565
pcsk1	ENSDARG00000002600	234.408	304.33	164.486	0.540486	-0.88767	0.0113411	0.699565
syt13	ENSDARG00000012306	187.078	246.221	127.934	0.519588	-0.944561	0.0111581	0.699565
cyp2aa8	ENSDARG00000090403	165.659	219.63	111.688	0.508529	-0.975597	0.0113362	0.699565
tnni1b	ENSDARG00000052708	147.225	196.977	97.4732	0.494845	-1.01495	0.0110273	0.699565
CABZ01052953.1	ENSDARG00000087460	74.5213	105.383	43.6599	0.414298	-1.27126	0.0113604	0.699565
mtnr1bb	ENSDARG00000086883	13.3569	22.6524	4.06138	0.179292	-2.47962	0.0113395	0.699565
slc6a1a	ENSDARG00000045944	893.662	1106.03	681.297	0.615986	-0.69903	0.0115052	0.706486
zgc:172051	ENSDARG00000086569	379.506	277.738	481.274	1.73284	0.793135	0.0115887	0.70961
fgf10b	ENSDARG00000067548	25.2161	10.8337	39.5985	3.65511	1.86991	0.0118319	0.715397
fam154b	ENSDARG00000006474	37.7861	18.7128	56.8594	3.03852	1.60337	0.0118999	0.715397
ebi3	ENSDARG00000053620	98.052	61.0629	135.041	2.21151	1.14503	0.0120169	0.715397
CABZ01065246.2	ENSDARG00000089734	132.178	86.6699	177.686	2.05014	1.03572	0.0120646	0.715397
zgc:110789	ENSDARG00000052497	315.793	228.494	403.092	1.76413	0.818958	0.0121098	0.715397
kcnj13	ENSDARG00000043443	502.886	375.241	630.53	1.68033	0.748746	0.0118168	0.715397
gar1	ENSDARG00000076526	558.06	418.576	697.543	1.66646	0.736791	0.011815	0.715397
abca1b	ENSDARG00000079009	2053.15	2520.32	1585.97	0.629273	-0.668242	0.0120911	0.715397
klhl41b	ENSDARG00000006757	1007.79	1243.91	771.663	0.620352	-0.68884	0.0118662	0.715397
FHL5	ENSDARG00000014805	154.703	205.841	103.565	0.503132	-0.99099	0.0117244	0.715397
pyya	ENSDARG00000053449	67.0585	95.5339	38.5832	0.403869	-1.30804	0.0119922	0.715397
DHRS7C (1 of 2)	ENSDARG00000039453	38.6999	58.1083	19.2916	0.331994	-1.59077	0.0120373	0.715397
prkg2	ENSDARG00000054741	38.6999	58.1083	19.2916	0.331994	-1.59077	0.0120373	0.715397
si:ch1073-464p5.5	ENSDARG00000079544	608.71	458.957	758.464	1.65258	0.724722	0.0121603	0.71644
nmrk1	ENSDARG00000037913	26.7239	11.8186	41.6292	3.52234	1.81653	0.0123353	0.716849
loxhd1a	ENSDARG00000094738	74.9579	44.3199	105.596	2.38259	1.25253	0.012269	0.716849
CU855694.1	ENSDARG00000091376	96.5442	60.078	133.01	2.21396	1.14663	0.0123459	0.716849
foxm1	ENSDARG00000003200	173.32	118.186	228.453	1.93299	0.950834	0.0123058	0.716849
camk2d2	ENSDARG00000014273	967.442	1193.68	741.203	0.620938	-0.687478	0.0123182	0.716849
STRIP2	ENSDARG00000059003	158.196	209.781	106.611	0.508204	-0.976521	0.0123935	0.716849
NPFFR1	ENSDARG00000091788	22.297	35.4559	9.13812	0.257732	-1.95606	0.0123975	0.716849
cpa4	ENSDARG00000043722	1772.92	1370.96	2174.87	1.58638	0.665743	0.012485	0.718102
scn8aa	ENSDARG00000005775	1389.51	1706.81	1072.21	0.628194	-0.670718	0.0124637	0.718102
mal	ENSDARG00000030094	126.654	82.7304	170.578	2.06186	1.04394	0.0125685	0.720644
cacng2b	ENSDARG00000009621	140.763	188.113	93.4118	0.496573	-1.00992	0.0125953	0.720644
glrbb	ENSDARG00000052769	480.091	601.765	358.417	0.59561	-0.747561	0.0126401	0.721314
rbpjl	ENSDARG00000074148	77.4658	46.2896	108.642	2.34701	1.23082	0.0127897	0.722285
si:ch73-15n24.1	ENSDARG00000079901	116.115	74.8513	157.379	2.10255	1.07214	0.0127415	0.722285
tmem38a	ENSDARG00000024047	1249.5	1535.44	963.564	0.62755	-0.672198	0.0127293	0.722285
TUBB8P7 (2 of 3)	ENSDARG00000038198	702.848	871.624	534.072	0.612732	-0.706671	0.0127647	0.722285
CDCA2	ENSDARG00000068759	260.604	186.143	335.064	1.80003	0.848023	0.0129322	0.723732
EPB41L1	ENSDARG00000076364	937.068	1155.27	718.865	0.622248	-0.684438	0.0129481	0.723732
aldoca	ENSDARG00000057661	185.6	243.267	127.934	0.525898	-0.927144	0.0129046	0.723732
si:ch1073-76a20.1	ENSDARG00000063640	121.836	164.476	79.197	0.481511	-1.05436	0.0129103	0.723732
pde6b	ENSDARG00000011671	453.205	337.816	568.594	1.68315	0.751162	0.0130528	0.725473
gria4b	ENSDARG00000059368	738.238	913.974	562.502	0.615446	-0.700295	0.013057	0.725473
UNC13A (1 of 5)	ENSDARG00000061829	427.775	537.748	317.803	0.59099	-0.758795	0.0131124	0.725473
slc6a4b	ENSDARG00000057017	16.8344	27.5768	6.09208	0.220913	-2.17845	0.0130997	0.725473
BAI1 (2 of 3)	ENSDARG00000076460	454.687	570.249	339.126	0.594698	-0.749772	0.0132067	0.726336
mfsd2b	ENSDARG00000030263	120.344	162.506	78.1817	0.4811	-1.05559	0.0131679	0.726336
NETO2 (1 of 2)	ENSDARG00000062343	110.881	150.688	71.0742	0.471666	-1.08416	0.0132279	0.726336
CU856539.4	ENSDARG00000090886	43.3096	22.6524	63.9668	2.82385	1.49766	0.0134315	0.735067
vmhc	ENSDARG00000079564	1805.12	2210.08	1400.16	0.633534	-0.658507	0.0134544	0.735067
actn3b	ENSDARG00000001431	5641.45	6980.87	4302.02	0.616259	-0.698392	0.0136006	0.7412
odf3l2	ENSDARG00000021432	12.6309	3.93954	21.3223	5.41237	2.43626	0.014006	0.741296
CU672266.1	ENSDARG00000090027	24.7084	10.8337	38.5832	3.56139	1.83244	0.0141174	0.741296
slc7a14b	ENSDARG00000079231	48.8331	26.5919	71.0742	2.67278	1.41834	0.0144584	0.741296
gna14a	ENSDARG00000025013	69.9269	41.3652	98.4886	2.38095	1.25154	0.0144659	0.741296
MPV17L	ENSDARG00000075517	131.162	86.6699	175.655	2.02671	1.01914	0.0137039	0.741296
fam151a	ENSDARG00000058218	184.844	128.035	241.652	1.88739	0.916393	0.0139973	0.741296
NUMA1 (1 of 4)	ENSDARG00000061928	188.859	130.99	246.729	1.88357	0.913473	0.0137418	0.741296
si:dkeyp-73d8.9	ENSDARG00000076043	204.907	143.793	266.021	1.85002	0.887542	0.0143784	0.741296
slc7a9	ENSDARG00000005894	209.923	147.733	272.113	1.84192	0.881214	0.0144495	0.741296
si:ch211-14k19.12	ENSDARG00000096584	240.525	171.37	309.681	1.80709	0.853665	0.0141378	0.741296
cdc20	ENSDARG00000020192	315.763	230.463	401.062	1.74024	0.799287	0.0143121	0.741296
elovl4b	ENSDARG00000027495	559.014	422.516	695.512	1.64612	0.71907	0.0139612	0.741296
si:ch211-243g18.2	ENSDARG00000044261	701.457	534.793	868.121	1.62328	0.698916	0.0137659	0.741296
nrxn1a	ENSDARG00000061647	1586.41	1941.21	1231.61	0.634457	-0.656405	0.0139996	0.741296
SV2A	ENSDARG00000059945	769.673	949.43	589.916	0.621337	-0.686552	0.0144743	0.741296
prrt1	ENSDARG00000062208	560.349	697.299	423.399	0.607199	-0.719759	0.0138707	0.741296
usp5	ENSDARG00000079198	523.467	652.979	393.954	0.603318	-0.729009	0.0136461	0.741296
mybpc2a	ENSDARG00000030157	264.335	338.801	189.87	0.560417	-0.835427	0.0140518	0.741296
klhl40a	ENSDARG00000039052	187.108	244.252	129.964	0.532092	-0.910253	0.0143959	0.741296
phyhipla	ENSDARG00000003998	168.674	221.599	115.749	0.522337	-0.936948	0.0144324	0.741296
ENSDARG00000004577	ENSDARG00000004577	134.3	179.249	89.3505	0.498471	-1.00442	0.014458	0.741296
slc25a6	ENSDARG00000005853	122.344	164.476	80.2123	0.487684	-1.03598	0.0143977	0.741296
vwa5b1	ENSDARG00000059705	51.6405	74.8513	28.4297	0.379816	-1.39663	0.0142426	0.741296
tph1b	ENSDARG00000036082	42.6852	63.0327	22.3376	0.354381	-1.49663	0.0141753	0.741296
p2rx2	ENSDARG00000002300	39.7	59.0931	20.3069	0.343643	-1.54102	0.0139257	0.741296
zgc:161979	ENSDARG00000041490	12.8644	21.6675	4.06138	0.187441	-2.41549	0.0144865	0.741296
si:dkeyp-87e3.1	ENSDARG00000093888	1187.29	1454.68	919.904	0.632377	-0.661144	0.0145487	0.742732
sc5d	ENSDARG00000044642	419.571	313.194	525.949	1.67931	0.747869	0.014777	0.750872
tmod4	ENSDARG00000020890	1132.48	1387.7	877.259	0.632166	-0.661625	0.0147721	0.750872
slc6a17	ENSDARG00000068787	271.321	346.68	195.962	0.565253	-0.823031	0.0148958	0.753696
CABZ01059391.1	ENSDARG00000040928	18.327	29.5466	7.10742	0.24055	-2.05559	0.0149017	0.753696
ppp1r42	ENSDARG00000057632	27.724	12.8035	42.6445	3.33069	1.73582	0.0150181	0.756073
ENSDARG00000053207	ENSDARG00000053207	1346.78	1646.73	1046.82	0.635698	-0.653587	0.0150136	0.756073
zgc:171470	ENSDARG00000057844	54.3566	30.5315	78.1817	2.56069	1.35653	0.0150927	0.756471
GPR101	ENSDARG00000039218	26.7747	41.3652	12.1842	0.294551	-1.76341	0.0150954	0.756471
sypa	ENSDARG00000042974	698.924	862.76	535.087	0.620204	-0.689185	0.0152007	0.758259
camk4	ENSDARG00000005372	220.498	284.632	156.363	0.549353	-0.864196	0.0151739	0.758259
tctex1d2	ENSDARG00000054255	52.8488	29.5466	76.151	2.57732	1.36587	0.0153876	0.759482
comta	ENSDARG00000015337	613.65	467.821	759.479	1.62344	0.699054	0.0154309	0.759482
SLC24A2 (1 of 2)	ENSDARG00000042988	962.711	744.574	1180.85	1.58594	0.665336	0.0154144	0.759482
BX294434.1	ENSDARG00000061272	544.931	676.617	413.246	0.610753	-0.711338	0.0154342	0.759482
SYNGAP1 (2 of 2)	ENSDARG00000069765	459.211	573.204	345.218	0.60226	-0.731541	0.015409	0.759482
CABZ01080274.1	ENSDARG00000089365	104.418	141.824	67.0128	0.472509	-1.08159	0.0153789	0.759482
slc38a5a	ENSDARG00000009901	463.191	348.65	577.732	1.65706	0.728623	0.0156239	0.764786
dnajb4	ENSDARG00000038978	82.507	114.247	50.7673	0.444365	-1.17018	0.015613	0.764786
abcg4a	ENSDARG00000061047	75.5367	105.383	45.6906	0.433568	-1.20567	0.0156776	0.764786
hif1al2	ENSDARG00000044550	37.715	56.1385	19.2916	0.343643	-1.54102	0.0156823	0.764786
adgb	ENSDARG00000005595	97.5291	62.0478	133.01	2.14368	1.10009	0.0158918	0.772303
grid1b	ENSDARG00000044161	1068.73	1307.93	829.538	0.634238	-0.656904	0.0159073	0.772303
rgs9a	ENSDARG00000037925	1279.66	996.704	1562.62	1.56778	0.648727	0.016021	0.772657
mir736	ENSDARG00000083623	126.837	169.4	84.2737	0.497483	-1.00728	0.0160165	0.772657
isl2b	ENSDARG00000053499	126.837	169.4	84.2737	0.497483	-1.00728	0.0160165	0.772657
SH2D4B (1 of 2)	ENSDARG00000015144	22.693	9.84886	35.5371	3.60825	1.8513	0.0162082	0.77996
marco	ENSDARG00000059294	48.3254	26.5919	70.0589	2.63459	1.39758	0.0162564	0.780559
efhb	ENSDARG00000069703	17.6619	6.8942	28.4297	4.12371	2.04394	0.0163879	0.781706
alx4b	ENSDARG00000074442	190.844	133.944	247.744	1.84961	0.887218	0.0163527	0.781706
syt5a	ENSDARG00000037941	770.602	593.886	947.318	1.59512	0.673662	0.0163642	0.781706
C11H1orf158	ENSDARG00000032885	19.1697	7.87909	30.4604	3.86598	1.95083	0.0176547	0.782501
fam228a	ENSDARG00000042936	36.2631	18.7128	53.8133	2.87575	1.52394	0.0180424	0.782501
lrrc9	ENSDARG00000054352	37.7709	19.6977	55.844	2.83505	1.50337	0.0179032	0.782501
odf2	ENSDARG00000028900	82.4664	51.2141	113.719	2.22046	1.15086	0.0172168	0.782501
TBC1D17 (2 of 2)	ENSDARG00000088972	91.4979	58.1083	124.888	2.14922	1.10381	0.0178711	0.782501
pax3a	ENSDARG00000010192	123.116	81.7455	164.486	2.01217	1.00875	0.0167734	0.782501
st6galnac1.1	ENSDARG00000043814	148.703	101.443	195.962	1.93174	0.9499	0.016778	0.782501
tfcp2l1	ENSDARG00000029497	187.829	131.975	243.683	1.84644	0.884745	0.0171222	0.782501
slc26a1	ENSDARG00000029832	184.813	130.005	239.622	1.84317	0.882192	0.0179393	0.782501
coe2	ENSDARG00000042525	197.353	139.854	254.852	1.82227	0.86574	0.0180415	0.782501
e2f8	ENSDARG00000057323	226.955	162.506	291.404	1.79319	0.842528	0.0169747	0.782501
ctsh	ENSDARG00000041108	329.764	244.252	415.277	1.7002	0.765704	0.0178149	0.782501
PLLP	ENSDARG00000062756	346.827	257.055	436.599	1.69846	0.76423	0.0168495	0.782501
tacc3	ENSDARG00000005454	434.081	326.982	541.18	1.65507	0.726896	0.017092	0.782501
slc2a2	ENSDARG00000056196	545.398	416.607	674.19	1.61829	0.694469	0.0179712	0.782501
rargb	ENSDARG00000054003	1752.61	1370.96	2134.26	1.55676	0.638547	0.0165547	0.782501
pdia2	ENSDARG00000018263	1629.18	1276.41	1981.96	1.55276	0.634831	0.0173555	0.782501
adssl1	ENSDARG00000009867	1873.65	2276.07	1471.24	0.646393	-0.629516	0.0180558	0.782501
myhb	ENSDARG00000001993	2370.45	2880.79	1860.11	0.645696	-0.631074	0.01791	0.782501
syt1a	ENSDARG00000030614	1743.08	2118.49	1367.67	0.645588	-0.631314	0.0178358	0.782501
adam23a	ENSDARG00000062323	1013.46	1238	788.924	0.637256	-0.650055	0.0174722	0.782501
CR388002.1	ENSDARG00000009026	948.653	1161.18	736.126	0.633946	-0.657567	0.016805	0.782501
sh3bgr	ENSDARG00000021633	722.896	888.367	557.425	0.627472	-0.672378	0.0173911	0.782501
egfl6	ENSDARG00000045958	687.999	847.002	528.995	0.62455	-0.67911	0.0169492	0.782501
nalcn	ENSDARG00000001835	564.903	698.284	431.522	0.617975	-0.694379	0.0174343	0.782501
pcdh1a	ENSDARG00000062720	513.557	637.221	389.893	0.611864	-0.708716	0.0167897	0.782501
cacna1c	ENSDARG00000008398	473.197	587.977	358.417	0.609577	-0.714119	0.0174291	0.782501
lrrc4.1	ENSDARG00000069402	338.131	425.471	250.791	0.589443	-0.762577	0.0177335	0.782501
neb	ENSDARG00000032630	13787.8	17438.4	10137.2	0.581316	-0.782605	0.0178066	0.782501
gria1a	ENSDARG00000021352	276.829	351.604	202.054	0.574663	-0.799212	0.0174824	0.782501
ucp3	ENSDARG00000091209	261.873	333.876	189.87	0.568683	-0.814304	0.0168805	0.782501
rapsn	ENSDARG00000041133	257.888	328.952	186.824	0.567936	-0.816199	0.0170315	0.782501
slc17a6a	ENSDARG00000001127	247.917	317.133	178.701	0.563489	-0.827542	0.0165845	0.782501
mylk4b	ENSDARG00000055412	237.454	304.33	170.578	0.560504	-0.835202	0.0167508	0.782501
aclyb	ENSDARG00000055652	225.006	288.572	161.44	0.559445	-0.837931	0.0179047	0.782501
MYL2 (1 of 2)	ENSDARG00000043349	202.572	261.98	143.164	0.546469	-0.871788	0.0165844	0.782501
znf648	ENSDARG00000087900	186.138	241.297	130.98	0.542815	-0.881467	0.0179	0.782501
nlgn2b	ENSDARG00000079251	176.168	229.478	122.857	0.535375	-0.90138	0.0171254	0.782501
DGKG	ENSDARG00000062696	170.69	222.584	118.796	0.53371	-0.905871	0.0175718	0.782501
ENSDARG00000014391	ENSDARG00000014391	119.374	159.551	79.197	0.496373	-1.0105	0.0178156	0.782501
BX119910.5	ENSDARG00000075115	118.374	158.567	78.1817	0.493052	-1.02019	0.0170729	0.782501
pik3cd	ENSDARG00000003250	72.0591	100.458	43.6599	0.434607	-1.20222	0.0176851	0.782501
EMC7 (2 of 2)	ENSDARG00000078209	55.1333	78.7909	31.4757	0.399485	-1.32379	0.0172705	0.782501
ENSDARG00000079443	ENSDARG00000079443	49.1631	70.9118	27.4143	0.386598	-1.37109	0.0178502	0.782501
KCNH1 (1 of 2)	ENSDARG00000023236	35.73	53.1838	18.2762	0.343643	-1.54102	0.0177098	0.782501
si:dkey-245p14.4	ENSDARG00000070320	31.2524	47.2745	15.2302	0.322165	-1.63413	0.0167859	0.782501
lhfpl4b	ENSDARG00000076943	43.1928	63.0327	23.353	0.37049	-1.43249	0.0181285	0.784092
PFKFB1 (2 of 2)	ENSDARG00000074457ption=6-phosphofructo-2-kinase/fructose-2,6-biphosphatase1 [Source:HGNC Symbol;Acc:8872]	130.132	87.6548	172.609	1.96919	0.977601	0.0182499	0.784175
agxtb	ENSDARG00000018478	2080.05	1633.93	2526.18	1.54608	0.628616	0.0181781	0.784175
isl1	ENSDARG00000004023	389.477	486.534	292.42	0.601027	-0.734499	0.0182643	0.784175
slc6a5	ENSDARG00000067964	204.08	262.965	145.195	0.552145	-0.856881	0.0182743	0.784175
FBXO15 (2 of 2)	ENSDARG00000029848	238.479	172.355	304.604	1.7673	0.821551	0.0183941	0.787613
s100u	ENSDARG00000071014	384.923	288.572	481.274	1.66778	0.73793	0.0184267	0.787613
ccne2	ENSDARG00000027918	208.385	148.718	268.051	1.80242	0.849933	0.0184877	0.788676
CLDN22	ENSDARG00000076137	15.6465	5.90931	25.3837	4.29553	2.10284	0.0185795	0.7895
cdhr1a	ENSDARG00000004643	374.891	280.692	469.09	1.67119	0.740874	0.0185652	0.7895
myl7	ENSDARG00000019096	211.558	271.828	151.287	0.556552	-0.845413	0.0187283	0.794276
hnrnpa0b	ENSDARG00000036162	1784.6	1403.46	2165.73	1.54314	0.625865	0.0187814	0.79498
CT025910.1	ENSDARG00000044591	396.462	494.413	298.512	0.60377	-0.727928	0.0189094	0.798847
cfb	ENSDARG00000055278	848.271	659.873	1036.67	1.57101	0.651693	0.0189688	0.799809
smdt1	ENSDARG00000095826	106.926	143.793	70.0589	0.487219	-1.03736	0.0190326	0.800949
ube2t	ENSDARG00000063285	84.4666	53.1838	115.749	2.1764	1.12195	0.0191529	0.801151
gabrb2	ENSDARG00000079586	288.308	364.408	212.207	0.582335	-0.780079	0.0191844	0.801151
CABZ01072244.1	ENSDARG00000091806	184.153	238.342	129.964	0.545284	-0.87492	0.0191043	0.801151
wfdc2	ENSDARG00000089187	84.0148	115.232	52.798	0.45819	-1.12598	0.0191124	0.801151
CR450711.2	ENSDARG00000090899	192.829	136.899	248.76	1.8171	0.86164	0.0193269	0.80249
opn1mw2	ENSDARG00000094617	287.622	211.75	363.494	1.71661	0.779566	0.0192601	0.80249
elovl2	ENSDARG00000045414	691.304	534.793	847.814	1.58531	0.664767	0.0192942	0.80249
si:dkey-57c22.1	ENSDARG00000093846	10.1078	2.95466	17.2609	5.84192	2.54644	0.0194962	0.804812
si:dkey-284e7.2	ENSDARG00000093483	10.1078	2.95466	17.2609	5.84192	2.54644	0.0194962	0.804812
si:dkey-106m10.6	ENSDARG00000094461	17.1543	6.8942	27.4143	3.97644	1.99148	0.0202569	0.804812
serpina7	ENSDARG00000087143	22.1853	9.84886	34.5218	3.50515	1.80948	0.0194697	0.804812
si:ch211-197l9.5	ENSDARG00000086679	23.6931	10.8337	36.5525	3.37395	1.75444	0.0200793	0.804812
si:ch211-202h22.9	ENSDARG00000079980	25.2009	11.8186	38.5832	3.2646	1.70691	0.0205273	0.804812
AL935200.4	ENSDARG00000088833	25.2009	11.8186	38.5832	3.2646	1.70691	0.0205273	0.804812
ankef1a	ENSDARG00000019135	38.771	20.6826	56.8594	2.74914	1.45898	0.0202205	0.804812
C13H10orf32	ENSDARG00000055070	47.3101	26.5919	68.0282	2.55823	1.35515	0.0205214	0.804812
IGFALS	ENSDARG00000037836	48.8178	27.5768	70.0589	2.5405	1.34511	0.0200807	0.804812
ERC2 (2 of 2)	ENSDARG00000090308	50.3256	28.5617	72.0896	2.524	1.33571	0.0196411	0.804812
ak7b	ENSDARG00000017023	54.3413	31.5163	77.1663	2.44845	1.29187	0.0204095	0.804812
ST3GAL1 (3 of 5)	ENSDARG00000057593	61.3726	36.4408	86.3044	2.36835	1.24388	0.019889	0.804812
si:ch211-186e20.7	ENSDARG00000077960	73.4197	45.3047	101.535	2.24115	1.16424	0.0204886	0.804812
amn	ENSDARG00000062947	85.4668	54.1687	116.765	2.15558	1.10807	0.0201543	0.804812
sepp1b	ENSDARG00000079727	244.988	178.264	311.711	1.74859	0.806192	0.0198369	0.804812
slc13a3	ENSDARG00000069478	261.035	191.068	331.003	1.73238	0.792759	0.0199951	0.804812
paf1	ENSDARG00000043886	315.702	234.403	397	1.69367	0.76015	0.0197777	0.804812
crb1	ENSDARG00000062245	421.003	319.103	522.903	1.63867	0.712522	0.020069	0.804812
mipb	ENSDARG00000013963	450.083	342.74	557.425	1.62638	0.701662	0.0204816	0.804812
si:ch211-152f6.6	ENSDARG00000081299	720.957	882.458	559.456	0.633975	-0.657503	0.0200508	0.804812
vmhcl	ENSDARG00000079782	600.831	738.664	462.998	0.626804	-0.673913	0.0199003	0.804812
aatkb	ENSDARG00000077477	569.934	701.239	438.63	0.625507	-0.676903	0.0202838	0.804812
smyd2b	ENSDARG00000005629	283.83	358.498	209.161	0.583437	-0.777351	0.0200461	0.804812
rn7sk	ENSDARG00000081270	278.845	352.589	205.1	0.581697	-0.781661	0.0198746	0.804812
slc18a3a	ENSDARG00000006356	235.484	300.39	170.578	0.567855	-0.816405	0.01959	0.804812
ELMO1 (2 of 2)	ENSDARG00000055400	210.573	269.859	151.287	0.560614	-0.83492	0.0203804	0.804812
rbfox3l	ENSDARG00000074310	124.867	165.461	84.2737	0.509327	-0.973335	0.0204867	0.804812
CT573433.2	ENSDARG00000087979	44.1929	64.0176	24.3683	0.38065	-1.39346	0.0203486	0.804812
SLC6A3	ENSDARG00000004219	36.7301	54.1687	19.2916	0.356139	-1.48949	0.0203932	0.804812
CR847851.5	ENSDARG00000088587	19.3271	30.5315	8.12277	0.266046	-1.91025	0.0199571	0.804812
sh2d4b	ENSDARG00000069374	26.7087	12.8035	40.6138	3.17209	1.66543	0.020837	0.806715
GPT (2 of 5)	ENSDARG00000052643	34.2476	17.7279	50.7673	2.86369	1.51787	0.0208915	0.806715
raver1	ENSDARG00000052617	175.767	124.096	227.438	1.83276	0.874018	0.0207181	0.806715
nop10	ENSDARG00000089426	231.941	168.415	295.466	1.75439	0.810966	0.0208066	0.806715
IMPG1 (1 of 2)	ENSDARG00000074839	308.67	229.478	387.862	1.69019	0.757186	0.0208803	0.806715
taar10	ENSDARG00000069214	345.781	259.025	432.537	1.66987	0.739734	0.020742	0.806715
tpx2	ENSDARG00000078654	596.003	459.942	732.065	1.59165	0.67052	0.0206282	0.806715
slc51a	ENSDARG00000045306	636.114	492.443	779.786	1.58351	0.663122	0.0209089	0.806715
kcnip1b	ENSDARG00000034808	215.558	275.768	155.348	0.563328	-0.827952	0.0206588	0.806715
efhc2	ENSDARG00000004204	45.8023	25.607	65.9975	2.57732	1.36587	0.0209612	0.807303
si:dkey-96l17.6	ENSDARG00000094540	29.7243	14.7733	44.6752	3.02405	1.59648	0.0211075	0.807366
CU638695.1	ENSDARG00000073876	32.7398	16.7431	48.7366	2.91086	1.54144	0.0210277	0.807366
zgc:92590	ENSDARG00000040282	71.9119	44.3199	99.5039	2.24513	1.1668	0.0210943	0.807366
bai3	ENSDARG00000059832	1092.81	1326.64	858.983	0.647487	-0.627077	0.021111	0.807366
cnga3a	ENSDARG00000070726	577.94	446.153	709.727	1.59077	0.669725	0.021336	0.812315
actn3a	ENSDARG00000013755	5250.8	6405.7	4095.91	0.639416	-0.645173	0.021464	0.812315
mmp24	ENSDARG00000018896	277.86	350.619	205.1	0.584965	-0.773579	0.0212794	0.812315
C1H20orf27 (2 of 2)	ENSDARG00000087426	181.676	234.403	128.949	0.550117	-0.86219	0.021374	0.812315
CABZ01078431.1	ENSDARG00000042608	69.5817	96.5188	42.6445	0.441826	-1.17845	0.0214536	0.812315
mthfd2l	ENSDARG00000054199	20.8197	32.5012	9.13812	0.281162	-1.83053	0.0214212	0.812315
C17orf105 (1 of 2)	ENSDARG00000089687	18.6621	7.87909	29.445	3.73711	1.90192	0.0215847	0.81263
si:dkey-30c15.10	ENSDARG00000088130	140.148	96.5188	183.778	1.90406	0.929079	0.0215639	0.81263
zgc:158463	ENSDARG00000089382	4007.95	4867.31	3148.59	0.646885	-0.628418	0.021569	0.81263
ANK1 (2 of 2)	ENSDARG00000074777	857.561	1043.98	671.144	0.642871	-0.637399	0.0216214	0.81263
mybl2	ENSDARG00000032264	231.433	168.415	294.45	1.74836	0.806	0.0216639	0.812706
zgc:92137	ENSDARG00000009443	1440.94	1138.53	1743.35	1.53123	0.614692	0.0217183	0.812706
MYL3	ENSDARG00000029321	93.9855	127.05	60.9208	0.479501	-1.06039	0.0217353	0.812706
mcf2a	ENSDARG00000022895	136.133	93.5641	178.701	1.90993	0.933519	0.0221368	0.818111
ndnl2	ENSDARG00000058212	206.354	148.718	263.99	1.77511	0.827906	0.0220503	0.818111
FP236810.3	ENSDARG00000093043	227.417	165.461	289.374	1.7489	0.806444	0.0221753	0.818111
pabpc4	ENSDARG00000059259	1978.01	2389.33	1566.68	0.655697	-0.608898	0.0221235	0.818111
mthfd1l	ENSDARG00000042221	428.897	530.853	326.941	0.615879	-0.699281	0.0220797	0.818111
AL935029.1	ENSDARG00000077162	382.537	475.7	289.374	0.608311	-0.717118	0.0221801	0.818111
KCNJ12 (2 of 2)	ENSDARG00000062618	236.5	300.39	172.609	0.574616	-0.799331	0.0221198	0.818111
CRIP2 (1 of 2)	ENSDARG00000033201	216.066	275.768	156.363	0.56701	-0.818553	0.0220448	0.818111
GPR156	ENSDARG00000086215	64.8806	39.3954	90.3658	2.29381	1.19775	0.0222194	0.818176
pcdh15a	ENSDARG00000052232	362.814	273.798	451.829	1.65023	0.722664	0.0224933	0.821381
nadl1.2	ENSDARG00000007149	734.958	896.246	573.671	0.640082	-0.643672	0.0224948	0.821381
zgc:91860	ENSDARG00000041599	491.707	605.705	377.709	0.623586	-0.68134	0.022388	0.821381
ngb	ENSDARG00000053475	174.706	225.539	123.872	0.549228	-0.864523	0.0224548	0.821381
cabp7b	ENSDARG00000060846	58.1336	81.7455	34.5218	0.422308	-1.24363	0.0224678	0.821381
fbl	ENSDARG00000053912	1166.61	920.868	1412.35	1.53371	0.617027	0.0226384	0.825243
CABZ01094378.1	ENSDARG00000089609	67.3885	41.3652	93.4118	2.25822	1.17519	0.0230203	0.826722
arhgap11a	ENSDARG00000015403	147.164	102.428	191.9	1.87351	0.905746	0.0229125	0.826722
GPR112 (1 of 2)	ENSDARG00000087813	396.401	301.375	491.428	1.63062	0.705419	0.02283	0.826722
CR678040.1	ENSDARG00000063007	760.885	926.778	594.993	0.642002	-0.639351	0.0228726	0.826722
SLC4A8	ENSDARG00000015531	434.39	536.763	332.018	0.618557	-0.693022	0.0229733	0.826722
myo10l1	ENSDARG00000074723	298.309	374.257	222.361	0.59414	-0.751125	0.0230073	0.826722
CU638738.1	ENSDARG00000040135	222.051	282.662	161.44	0.571141	-0.808081	0.0228125	0.826722
kctd16a	ENSDARG00000004648	117.404	155.612	79.197	0.508939	-0.974435	0.022957	0.826722
cdk5r1a	ENSDARG00000037916	56.6411	79.7757	33.5064	0.420008	-1.25151	0.0228236	0.826722
si:dkey-11n6.3	ENSDARG00000095557	240.449	176.295	304.604	1.72781	0.788946	0.02323	0.829064
hmmr	ENSDARG00000021794	275.052	203.871	346.233	1.69829	0.764084	0.0231512	0.829064
cbln2b	ENSDARG00000077151	184.676	237.357	131.995	0.556102	-0.846578	0.0231876	0.829064
mettl11b	ENSDARG00000042033	36.2377	53.1838	19.2916	0.362734	-1.46302	0.0232377	0.829064
sfr1	ENSDARG00000021974	11.6156	3.93954	19.2916	4.89691	2.29187	0.0235369	0.829106
cthl	ENSDARG00000032206	148.164	103.413	192.916	1.86549	0.899553	0.0235619	0.829106
AMDHD1	ENSDARG00000007366	316.671	237.357	395.985	1.66831	0.738384	0.0234568	0.829106
cbsa	ENSDARG00000053500	642.592	500.322	784.863	1.56871	0.649583	0.0234636	0.829106
elmod1	ENSDARG00000062056	489.229	601.765	376.693	0.625981	-0.67581	0.0236075	0.829106
fgf13a	ENSDARG00000035056	358.625	446.153	271.097	0.607633	-0.718728	0.0236192	0.829106
BX255895.1	ENSDARG00000079670	268.904	338.801	199.008	0.587389	-0.767612	0.0233315	0.829106
gpd1a	ENSDARG00000043701	245.978	311.224	180.732	0.580713	-0.784104	0.0233848	0.829106
trim13	ENSDARG00000010010	187.169	240.312	134.026	0.557715	-0.8424	0.023358	0.829106
glipr1b	ENSDARG00000030078	74.567	102.428	46.7059	0.455987	-1.13293	0.0235092	0.829106
cbln14	ENSDARG00000053845	69.8964	43.335	96.4579	2.22587	1.15437	0.023758	0.82997
GRIK2 (1 of 2)	ENSDARG00000074515	366.103	455.017	277.19	0.609185	-0.715049	0.0237513	0.82997
CR848746.2	ENSDARG00000090473	11.8796	19.6977	4.06138	0.206186	-2.27798	0.0237323	0.82997
col5a3b	ENSDARG00000028524	3475.65	2749.8	4201.5	1.52793	0.611578	0.0238524	0.831934
vsnl1a	ENSDARG00000023228	732.989	892.307	573.671	0.642908	-0.637317	0.0238935	0.832036
si:dkey-57a22.12	ENSDARG00000093594	23.1854	10.8337	35.5371	3.28022	1.71379	0.0239334	0.832078
trim9	ENSDARG00000039123	226.544	287.587	165.501	0.575484	-0.797153	0.0239711	0.832078
gucy2f	ENSDARG00000025504	129.101	88.6397	169.563	1.91294	0.935795	0.024101	0.833932
capn3b	ENSDARG00000043035	265.919	334.861	196.977	0.588235	-0.765535	0.0240751	0.833932
tpd52l1	ENSDARG00000042548	200.323	144.778	255.867	1.7673	0.821551	0.0241702	0.835003
si:ch211-240l19.5	ENSDARG00000039393	275.545	204.856	346.233	1.69013	0.757132	0.0243608	0.83724
dlc	ENSDARG00000002336	344.243	260.01	428.476	1.64792	0.720648	0.0243598	0.83724
kcnd2	ENSDARG00000032799	236.515	299.405	173.624	0.579897	-0.786132	0.0243886	0.83724
rgs8	ENSDARG00000070037	234.022	296.451	171.594	0.578827	-0.788797	0.0242885	0.83724
cldnc	ENSDARG00000015955	245.957	181.219	310.696	1.71448	0.777769	0.0244303	0.837354
CABZ01102518.1	ENSDARG00000086526	25.2973	38.4105	12.1842	0.317209	-1.6565	0.0244737	0.837522
si:ch211-204a13.1	ENSDARG00000092992	13.1233	4.92443	21.3223	4.3299	2.11433	0.026719	0.839408
st3gal1l	ENSDARG00000079310	16.6466	6.8942	26.399	3.82916	1.93703	0.0250414	0.839408
ttll9	ENSDARG00000062806	37.7556	20.6826	54.8287	2.65096	1.40651	0.0262555	0.839408
her13	ENSDARG00000007097	55.8339	33.4861	78.1817	2.33475	1.22327	0.0264308	0.839408
C8H1orf173	ENSDARG00000069262	66.8809	41.3652	92.3965	2.23368	1.15942	0.0252311	0.839408
terf1	ENSDARG00000058710	77.4201	49.2443	105.596	2.14433	1.10053	0.025562	0.839408
rab11fip4b	ENSDARG00000070319	91.9751	60.078	123.872	2.06186	1.04394	0.0246675	0.839408
mfsd4b	ENSDARG00000008263	163.197	116.217	210.177	1.80849	0.854787	0.0267236	0.839408
fam3c	ENSDARG00000056152	245.45	181.219	309.681	1.70887	0.773047	0.0253763	0.839408
cfhl2	ENSDARG00000056778	253.974	188.113	319.834	1.70022	0.765723	0.0255416	0.839408
TMC5	ENSDARG00000013252	263.498	195.992	331.003	1.68886	0.756047	0.0261028	0.839408
ndc80	ENSDARG00000071694	279.545	208.796	350.294	1.67769	0.746475	0.0259198	0.839408
KLF16	ENSDARG00000069342	325.688	245.237	406.138	1.65611	0.727798	0.0246254	0.839408
slc6a13	ENSDARG00000000730	357.767	271.828	443.706	1.6323	0.706908	0.0259948	0.839408
slc22a2	ENSDARG00000030530	408.403	313.194	503.612	1.60799	0.685257	0.0261347	0.839408
ush1c	ENSDARG00000051876	426.958	327.967	525.949	1.60367	0.681373	0.0257553	0.839408
myo7aa	ENSDARG00000061937	443.006	340.77	545.241	1.60002	0.678093	0.025488	0.839408
h6pd	ENSDARG00000060153	669.626	524.944	814.308	1.55123	0.63341	0.0263225	0.839408
COL7A1	ENSDARG00000021720	780.959	613.584	948.333	1.54556	0.628134	0.0249096	0.839408
zgc:158614	ENSDARG00000061634	792.975	624.418	961.533	1.53989	0.622825	0.0259082	0.839408
gpnmb	ENSDARG00000062688	1126.9	895.261	1358.53	1.51747	0.601669	0.0265435	0.839408
lrp2a	ENSDARG00000060649	1763.74	1406.42	2121.06	1.50813	0.59276	0.026016	0.839408
slc25a4	ENSDARG00000027355	1827.67	2196.3	1459.05	0.664324	-0.59004	0.0266481	0.839408
tmem59l	ENSDARG00000003655	836.711	1013.45	659.975	0.651218	-0.618788	0.0260846	0.839408
sez6l2	ENSDARG00000076052	690.659	839.123	542.195	0.646145	-0.63007	0.0265787	0.839408
nadl1.1	ENSDARG00000015025	714.078	867.684	560.471	0.645939	-0.63053	0.0258703	0.839408
syn2a	ENSDARG00000045945	627.342	764.271	490.412	0.641673	-0.64009	0.0260669	0.839408
xpr1	ENSDARG00000062449	642.283	782.984	501.581	0.640602	-0.6425	0.0250597	0.839408
gria4a	ENSDARG00000037496	621.849	758.362	485.335	0.639979	-0.643904	0.0253681	0.839408
stxbp5l	ENSDARG00000006383	533.62	652.979	414.261	0.634417	-0.656496	0.0257707	0.839408
ttc39c	ENSDARG00000010191	463.333	569.264	357.402	0.627831	-0.671551	0.0258159	0.839408
nlgn3b	ENSDARG00000062376	339.207	421.531	256.883	0.609404	-0.71453	0.026111	0.839408
olfm2a	ENSDARG00000077847	322.251	401.833	242.668	0.603901	-0.727615	0.0250614	0.839408
cntn1b	ENSDARG00000045685	301.817	377.211	226.422	0.600253	-0.736357	0.0254272	0.839408
AIMP1 (1 of 2)	ENSDARG00000036894	303.309	379.181	227.438	0.599813	-0.737416	0.0250589	0.839408
grin2aa	ENSDARG00000034493	304.802	381.151	228.453	0.599377	-0.738465	0.0246977	0.839408
cntnap5b	ENSDARG00000075189	293.339	367.362	219.315	0.596998	-0.744201	0.0248292	0.839408
inab	ENSDARG00000053248	249.486	314.179	184.793	0.588178	-0.765675	0.0262831	0.839408
trpm3	ENSDARG00000039181	232.037	293.496	170.578	0.581194	-0.782908	0.0256735	0.839408
slc29a4	ENSDARG00000059690	198.647	253.116	144.179	0.569618	-0.811934	0.0263	0.839408
hivep3a	ENSDARG00000075928	188.677	241.297	136.056	0.563854	-0.826605	0.0257233	0.839408
CU694197.1	ENSDARG00000088952	156.287	201.902	110.673	0.548152	-0.867352	0.0265886	0.839408
kiaa1549lb	ENSDARG00000062086	147.809	192.053	103.565	0.539255	-0.890962	0.0251399	0.839408
GCGR (2 of 2)	ENSDARG00000070973	142.824	186.143	99.5039	0.534555	-0.903589	0.0246501	0.839408
tmem178	ENSDARG00000020758	135.853	177.279	94.4272	0.532646	-0.908751	0.0261034	0.839408
gfra2b	ENSDARG00000044015	134.853	176.295	93.4118	0.529862	-0.91631	0.0252397	0.839408
CLPB	ENSDARG00000088463	76.5673	104.398	48.7366	0.466835	-1.09901	0.0265215	0.839408
ATCAY (3 of 3)	ENSDARG00000071682	76.5673	104.398	48.7366	0.466835	-1.09901	0.0265215	0.839408
crtac1b	ENSDARG00000075394	68.5968	94.549	42.6445	0.451031	-1.1487	0.0255512	0.839408
BX664721.5	ENSDARG00000090371	65.6117	90.6095	40.6138	0.448229	-1.15769	0.0266185	0.839408
hn1a	ENSDARG00000054002	64.6116	89.6246	39.5985	0.441826	-1.17845	0.0248197	0.839408
ephx4	ENSDARG00000061162	63.119	87.6548	38.5832	0.440171	-1.18386	0.0253024	0.839408
THSD7B (1 of 2)	ENSDARG00000061497	63.119	87.6548	38.5832	0.440171	-1.18386	0.0253024	0.839408
cbln12	ENSDARG00000068232	32.7601	48.2594	17.2609	0.357669	-1.4833	0.0263982	0.839408
FLNB (1 of 2)	ENSDARG00000092598	32.7601	48.2594	17.2609	0.357669	-1.4833	0.0263982	0.839408
CR407557.1	ENSDARG00000074395	26.7899	40.3803	13.1995	0.32688	-1.61317	0.0251255	0.839408
C1QL1 (2 of 2)	ENSDARG00000031013	26.7899	40.3803	13.1995	0.32688	-1.61317	0.0251255	0.839408
apba2b	ENSDARG00000060639	481.289	589.947	372.632	0.631637	-0.662833	0.0268056	0.840769
CR392006.1	ENSDARG00000017036	606.415	738.664	474.167	0.641924	-0.639525	0.0268924	0.84228
KCNT2 (2 of 3)	ENSDARG00000075812	21.8198	33.4861	10.1535	0.303214	-1.72159	0.0269436	0.842672
SYNPO2L (1 of 2)	ENSDARG00000077293	516.187	631.312	401.062	0.635283	-0.654528	0.0269939	0.843039
si:dkey-57a22.11	ENSDARG00000092651	54.3261	32.5012	76.151	2.34302	1.22837	0.027218	0.847639
necab2	ENSDARG00000056745	806.322	976.022	636.622	0.652262	-0.616476	0.027219	0.847639
BX663520.1	ENSDARG00000041685	1237.69	985.871	1489.51	1.51086	0.59537	0.0272677	0.847944
grin2ab	ENSDARG00000070543	235.037	296.451	173.624	0.585677	-0.771824	0.027319	0.848328
YIPF7	ENSDARG00000039726	126.39	165.461	87.3198	0.527737	-0.922109	0.0273925	0.8494
stoml3a	ENSDARG00000079914	33.2323	17.7279	48.7366	2.74914	1.45898	0.0276594	0.851136
manf	ENSDARG00000063177	270.006	201.902	338.11	1.67463	0.743842	0.0276847	0.851136
UGT8	ENSDARG00000037455	500.642	389.03	612.254	1.5738	0.654249	0.027756	0.851136
ncaldb	ENSDARG00000011334	1276.79	1018.37	1535.2	1.50751	0.592165	0.0278389	0.851136
MUC5AC (1 of 3)	ENSDARG00000058556	1425.71	1138.53	1712.89	1.50448	0.589262	0.0278085	0.851136
si:dkey-31k12.2	ENSDARG00000096542	543.114	662.828	423.399	0.638777	-0.646616	0.0276508	0.851136
lnx2a	ENSDARG00000029177	304.325	379.181	229.468	0.605168	-0.724592	0.0275599	0.851136
si:ch211-13o20.3	ENSDARG00000091871	245.008	308.269	181.747	0.589572	-0.76226	0.027637	0.851136
FP102801.1	ENSDARG00000087364	182.706	233.418	131.995	0.565488	-0.822432	0.0278167	0.851136
TMEM63C	ENSDARG00000004158	168.751	216.675	120.826	0.557638	-0.842599	0.0275468	0.851136
olfcs2	ENSDARG00000033266	22.6778	10.8337	34.5218	3.1865	1.67197	0.0285149	0.851209
CABZ01079296.1	ENSDARG00000088285	40.2636	22.6524	57.8747	2.55491	1.35327	0.0285442	0.851209
si:dkey-14d8.7	ENSDARG00000045834	88.4519	58.1083	118.796	2.04438	1.03167	0.0283983	0.851209
apod	ENSDARG00000060345	254.958	190.083	319.834	1.6826	0.750694	0.0284009	0.851209
FRMPD2	ENSDARG00000074119	285.546	214.705	356.387	1.65989	0.731086	0.0283401	0.851209
anln	ENSDARG00000060917	319.641	242.282	397	1.63859	0.712454	0.0284243	0.851209
zfp36l1b	ENSDARG00000021443	736.786	581.083	892.489	1.53591	0.619092	0.0280558	0.851209
elnb	ENSDARG00000069017	1005.52	799.727	1211.31	1.51465	0.598986	0.0285101	0.851209
ZBTB11	ENSDARG00000017886	427.466	524.944	329.988	0.628615	-0.669752	0.0283996	0.851209
ppp3cb	ENSDARG00000025106	364.149	450.093	278.205	0.618106	-0.694075	0.028309	0.851209
csf1ra	ENSDARG00000007889	326.759	405.773	247.744	0.610549	-0.71182	0.0278956	0.851209
syt4	ENSDARG00000036505	310.31	386.075	234.545	0.607511	-0.719017	0.0280848	0.851209
BX511021.3	ENSDARG00000077545	241.023	303.345	178.701	0.589102	-0.763412	0.028035	0.851209
ADAMTS14	ENSDARG00000078494	208.126	263.949	152.302	0.577012	-0.793327	0.0279298	0.851209
slc35g2a	ENSDARG00000056262	136.361	177.279	95.4425	0.538373	-0.893321	0.028526	0.851209
CU302376.1	ENSDARG00000086027	66.6118	91.5944	41.6292	0.454495	-1.13766	0.0284734	0.851209
si:ch211-22k7.9	ENSDARG00000087788	54.1636	75.8362	32.4911	0.428438	-1.22284	0.0283279	0.851209
drd1b	ENSDARG00000038918	45.7007	65.0025	26.399	0.406123	-1.30001	0.0281095	0.851209
CU928213.1	ENSDARG00000086031	25.6933	12.8035	38.5832	3.01348	1.59143	0.028851	0.853113
tmem54	ENSDARG00000035875	27.2011	13.7884	40.6138	2.94551	1.55852	0.0288023	0.853113
pde6d	ENSDARG00000074892	236.403	175.31	297.496	1.69698	0.762967	0.0287905	0.853113
dtnbb	ENSDARG00000013020	228.067	287.587	168.547	0.586075	-0.770842	0.0287047	0.853113
IGLON5	ENSDARG00000022176	202.648	257.055	148.241	0.576688	-0.794138	0.028882	0.853113
BEGAIN (1 of 2)	ENSDARG00000043673	200.155	254.101	146.21	0.575402	-0.797359	0.028766	0.853113
C12H10orf71 (1 of 2)	ENSDARG00000086945	147.824	191.068	104.581	0.547348	-0.869469	0.0288155	0.853113
sptb	ENSDARG00000030490	1122.91	1350.28	895.535	0.663223	-0.592435	0.0290036	0.855548
trim63	ENSDARG00000028027	290.876	362.438	219.315	0.60511	-0.724731	0.0291344	0.858244
enkur	ENSDARG00000031248	38.7558	21.6675	55.844	2.57732	1.36587	0.0292211	0.858795
PLEKHA4	ENSDARG00000071460	102.479	135.914	69.0435	0.507993	-0.977118	0.0292319	0.858795
si:ch211-222e20.4	ENSDARG00000092578	100.991	67.9571	134.026	1.97221	0.979813	0.0294007	0.860567
wu:fb63c12	ENSDARG00000096426	118.547	81.7455	155.348	1.90039	0.926292	0.0298113	0.860567
slc30a10	ENSDARG00000034877	136.102	95.5339	176.67	1.84929	0.886974	0.0296064	0.860567
si:ch211-238e22.1	ENSDARG00000092981	162.181	116.217	208.146	1.79102	0.84078	0.0295796	0.860567
cpa1	ENSDARG00000030915	278.515	209.781	347.248	1.65529	0.727086	0.0301468	0.860567
C13H10orf11	ENSDARG00000057166	342.197	260.995	423.399	1.62225	0.697998	0.0293708	0.860567
pvalb9	ENSDARG00000071601	520.675	406.758	634.591	1.56012	0.641658	0.0298515	0.860567
mtp	ENSDARG00000076271	589.358	462.896	715.819	1.54639	0.628906	0.0301142	0.860567
NAALADL1	ENSDARG00000020952	665.564	524.944	806.185	1.53575	0.618947	0.0300569	0.860567
klhl8	ENSDARG00000015344	2838.77	2274.1	3403.44	1.49661	0.581697	0.029839	0.860567
bcar1	ENSDARG00000056525	1989.79	2382.44	1597.14	0.67038	-0.576949	0.0300865	0.860567
plxna4	ENSDARG00000019328	1244.06	1493.09	995.039	0.666431	-0.585473	0.0298962	0.860567
si:ch73-96b22.1	ENSDARG00000087641	1152.34	1383.76	920.919	0.665517	-0.587452	0.030095	0.860567
clstn3	ENSDARG00000073883	1157.82	1390.66	924.98	0.665138	-0.588274	0.0298174	0.860567
hbae3	ENSDARG00000079305	726.094	878.518	573.671	0.652998	-0.614849	0.0294556	0.860567
sgcd	ENSDARG00000009789	528.681	644.115	413.246	0.641571	-0.640318	0.0298584	0.860567
btbd6b	ENSDARG00000032369	391.583	481.609	301.558	0.626146	-0.675428	0.0296936	0.860567
NAPB (1 of 2)	ENSDARG00000013669	368.149	454.032	282.266	0.621688	-0.685739	0.029889	0.860567
SLITRK5 (2 of 2)	ENSDARG00000076987	120.42	157.582	83.2584	0.528351	-0.920433	0.0301678	0.860567
SLC29A4 (2 of 2)	ENSDARG00000079873	100.986	133.944	68.0282	0.507884	-0.97743	0.0299778	0.860567
chrnb2a	ENSDARG00000008674	36.7454	53.1838	20.3069	0.381825	-1.38902	0.0299553	0.860567
kcnj5	ENSDARG00000061014	30.7751	45.3047	16.2455	0.358584	-1.47962	0.0302002	0.860567
CABZ01088168.1	ENSDARG00000087967	27.79	41.3652	14.2148	0.343643	-1.54102	0.0297526	0.860567
hspb2	ENSDARG00000052450	32.2677	47.2745	17.2609	0.36512	-1.45356	0.0302581	0.861091
si:dkey-27b3.8	ENSDARG00000095015	11.1079	3.93954	18.2762	4.63918	2.21387	0.0305775	0.861553
CKAP2L	ENSDARG00000092098	158.166	113.262	203.069	1.79292	0.842309	0.0304924	0.861553
celsr1b	ENSDARG00000058259	382.801	294.481	471.121	1.59983	0.677923	0.0304337	0.861553
map7d3	ENSDARG00000060771	832.01	660.858	1003.16	1.51797	0.602142	0.0304094	0.861553
ptpn5	ENSDARG00000074866	425.988	521.989	329.988	0.632173	-0.661609	0.0304728	0.861553
ggctb	ENSDARG00000005085	340.237	420.546	259.929	0.618074	-0.694149	0.0305447	0.861553
CAMKV (2 of 3)	ENSDARG00000027963	149.824	193.038	106.611	0.552283	-0.856521	0.0305697	0.861553
sox14	ENSDARG00000070929	85.0454	114.247	55.844	0.488802	-1.03268	0.0305905	0.861553
RCVRN (1 of 4)	ENSDARG00000009637	2179.27	1751.13	2607.41	1.48899	0.574333	0.0308766	0.864787
cyfip2	ENSDARG00000036375	1164.82	1397.55	932.088	0.666943	-0.584365	0.030852	0.864787
vsnl1b	ENSDARG00000044053	524.203	638.206	410.2	0.642739	-0.637695	0.030751	0.864787
dpysl4	ENSDARG00000057316	272.443	339.786	205.1	0.603616	-0.728298	0.0308163	0.864787
CR385022.1	ENSDARG00000079569	46.7008	65.9873	27.4143	0.415449	-1.26726	0.0309037	0.864787
cdcp2	ENSDARG00000075866	52.3106	31.5163	73.1049	2.31959	1.21387	0.031127	0.866586
s100z	ENSDARG00000038729	92.96	62.0478	123.872	1.9964	0.997401	0.0310907	0.866586
ctsbb	ENSDARG00000067570	303.578	230.463	376.693	1.63451	0.708854	0.0310904	0.866586
mamdc1	ENSDARG00000024017	287.399	357.514	217.284	0.607765	-0.718415	0.0310149	0.866586
c6ast3	ENSDARG00000024503	74.897	48.2594	101.535	2.10393	1.07309	0.0312121	0.867469
zgc:165525	ENSDARG00000001463	324.134	247.206	401.062	1.62238	0.698109	0.0312383	0.867469
CR854881.4	ENSDARG00000089990	1747.01	1404.45	2089.58	1.48783	0.573212	0.0313446	0.869314
slc12a5b	ENSDARG00000078187	463.886	566.309	361.463	0.638279	-0.647741	0.0314837	0.871297
cacna1r	ENSDARG00000062346	252.009	315.163	188.854	0.599227	-0.738826	0.031554	0.871297
ntrk2b	ENSDARG00000059645	225.59	283.647	167.532	0.590636	-0.759659	0.0315473	0.871297
si:ch211-251f6.6	ENSDARG00000053448	190.2	241.297	139.102	0.576478	-0.794663	0.031576	0.871297
eno2	ENSDARG00000014287	1038.71	1246.87	830.553	0.666113	-0.586161	0.0316709	0.871709
gria2a	ENSDARG00000070173	763.515	920.868	606.162	0.65825	-0.603292	0.0316479	0.871709
chodl	ENSDARG00000034528	110.957	145.763	76.151	0.52243	-0.936691	0.0317628	0.873137
C7H15orf43	ENSDARG00000039477	17.6467	7.87909	27.4143	3.47938	1.79883	0.0322507	0.875101
spata17	ENSDARG00000054414	17.6467	7.87909	27.4143	3.47938	1.79883	0.0322507	0.875101
ggt1a	ENSDARG00000023526	31.2168	16.7431	45.6906	2.72893	1.44833	0.0323654	0.875101
kif6	ENSDARG00000053240	31.2168	16.7431	45.6906	2.72893	1.44833	0.0323654	0.875101
slx4ip	ENSDARG00000039069	54.8185	33.4861	76.151	2.27411	1.1853	0.0323828	0.875101
alg6	ENSDARG00000017617	295.547	224.554	366.54	1.6323	0.706908	0.0325826	0.875101
TBC1D14	ENSDARG00000003520	321.118	245.237	397	1.61885	0.694966	0.0323475	0.875101
rbm24a	ENSDARG00000078293	576.295	454.032	698.558	1.53856	0.621585	0.0326245	0.875101
gys2	ENSDARG00000004904	697.121	552.521	841.722	1.52342	0.607315	0.0322739	0.875101
slc1a2a	ENSDARG00000052138	817.44	651.01	983.87	1.5113	0.59579	0.032502	0.875101
ugt5b4	ENSDARG00000057612	1418.57	1140.5	1696.64	1.48763	0.57302	0.0324154	0.875101
ppp3ca	ENSDARG00000004988	618.94	749.498	488.382	0.651611	-0.617916	0.0319753	0.875101
bves	ENSDARG00000058548	182.229	231.448	133.01	0.574687	-0.799151	0.0326236	0.875101
ENSDARG00000040013	ENSDARG00000040013	160.795	205.841	115.749	0.562324	-0.830526	0.0321685	0.875101
plxnb2b	ENSDARG00000036985	142.854	184.174	101.535	0.551298	-0.859095	0.0325371	0.875101
myh6	ENSDARG00000090637	133.884	173.34	94.4272	0.544752	-0.876329	0.0326372	0.875101
ptchd4	ENSDARG00000008249	63.1342	86.6699	39.5985	0.456888	-1.13009	0.0325135	0.875101
OGFOD2	ENSDARG00000056211	42.2232	60.078	24.3683	0.405611	-1.30183	0.0323608	0.875101
CCL19 (2 of 2)	ENSDARG00000039351	42.2232	60.078	24.3683	0.405611	-1.30183	0.0323608	0.875101
EXT1 (1 of 4)	ENSDARG00000017795	21.3273	32.5012	10.1535	0.312402	-1.67852	0.0320458	0.875101
ncf2	ENSDARG00000005821	29.709	15.7582	43.6599	2.77062	1.47021	0.0328811	0.878214
KCNK17	ENSDARG00000076580	29.709	15.7582	43.6599	2.77062	1.47021	0.0328811	0.878214
igsf9b	ENSDARG00000010408	478.533	374.257	582.809	1.55724	0.638995	0.0328495	0.878214
si:ch73-226l13.2	ENSDARG00000095939	514.628	403.803	625.453	1.54891	0.63125	0.0329144	0.878214
si:ch211-71m22.2	ENSDARG00000092893	19.1545	8.86397	29.445	3.32188	1.732	0.0331303	0.879099
cx23	ENSDARG00000054150	49.2951	29.5466	69.0435	2.33677	1.22452	0.033128	0.879099
fa2h	ENSDARG00000090063	1047.05	839.123	1254.97	1.49557	0.580697	0.0331492	0.879099
dtna	ENSDARG00000031015	281.429	349.634	213.223	0.609845	-0.713486	0.033016	0.879099
bmf2	ENSDARG00000041414	56.1639	77.806	34.5218	0.44369	-1.17237	0.0331107	0.879099
myo5aa	ENSDARG00000061635	823.862	990.795	656.929	0.663032	-0.592849	0.0332614	0.879932
PPP2R5B	ENSDARG00000054931	390.614	478.654	302.573	0.632133	-0.661701	0.0332349	0.879932
abhd6b	ENSDARG00000070894	16.3572	25.607	7.10742	0.277557	-1.84914	0.0333749	0.880799
CYP11A1 (2 of 2)	ENSDARG00000092696	16.3572	25.607	7.10742	0.277557	-1.84914	0.0333749	0.880799
rad51ap1	ENSDARG00000045853	53.3108	32.5012	74.1203	2.28054	1.18937	0.0334434	0.881538
CU929148.1	ENSDARG00000090724	24.3125	36.4408	12.1842	0.334355	-1.58055	0.0337009	0.887253
junbb	ENSDARG00000088371	190.707	241.297	140.118	0.580686	-0.78417	0.0337417	0.887256
PACRG (2 of 2)	ENSDARG00000087556	12.6157	4.92443	20.3069	4.12371	2.04394	0.0340318	0.889325
C17H14orf166B	ENSDARG00000060062	12.6157	4.92443	20.3069	4.12371	2.04394	0.0340318	0.889325
si:dkey-114d20.9	ENSDARG00000094476	22.1701	10.8337	33.5064	3.09278	1.62891	0.0339569	0.889325
CREM (1 of 2)	ENSDARG00000023217	533.168	419.561	646.776	1.54155	0.624383	0.0338665	0.889325
dctn1b	ENSDARG00000056753	499.307	606.69	391.924	0.646003	-0.630386	0.0340652	0.889325
PDE2A (2 of 2)	ENSDARG00000091508	60.1491	82.7304	37.5678	0.454099	-1.13892	0.0340268	0.889325
ACAP2 (1 of 2)	ENSDARG00000056478	288.414	357.514	219.315	0.613445	-0.704995	0.0341253	0.88983
CABZ01072699.2	ENSDARG00000088201	59.8343	37.4257	82.243	2.1975	1.13587	0.0345304	0.89118
ENSDARG00000090967	ENSDARG00000090967	90.9446	61.0629	120.826	1.97872	0.984565	0.0346012	0.89118
plp1a	ENSDARG00000057770	158.15	114.247	202.054	1.76857	0.822587	0.0345657	0.89118
ercc6l	ENSDARG00000002479	219.325	163.491	275.159	1.68302	0.751053	0.0346849	0.89118
gabra6a	ENSDARG00000075058	397.802	309.254	486.351	1.57266	0.653204	0.0348332	0.89118
dscama	ENSDARG00000024865	709.707	854.881	564.532	0.660364	-0.598667	0.0344576	0.89118
LMTK3	ENSDARG00000029114	574.595	695.329	453.86	0.652726	-0.61545	0.0345005	0.89118
C13H10orf71 (2 of 2)	ENSDARG00000086970	506.292	614.569	398.016	0.647634	-0.626749	0.0347003	0.89118
rtn2a	ENSDARG00000016088	252.024	314.179	189.87	0.604337	-0.726575	0.0344582	0.89118
b3gat1	ENSDARG00000040547	126.913	164.476	89.3505	0.543243	-0.880329	0.034856	0.89118
rab3b	ENSDARG00000042803	117.943	153.642	82.243	0.535289	-0.901609	0.0348721	0.89118
RNF122	ENSDARG00000063483	115.45	150.688	80.2123	0.532309	-0.909664	0.0345452	0.89118
KCNJ3 (1 of 2)	ENSDARG00000062217	106.479	139.854	73.1049	0.522724	-0.935879	0.0343009	0.89118
PRKACB (3 of 4)	ENSDARG00000068026	30.2827	44.3199	16.2455	0.366552	-1.44791	0.0347315	0.89118
CR524823.3	ENSDARG00000086693	30.2827	44.3199	16.2455	0.366552	-1.44791	0.0347315	0.89118
CACNG5 (2 of 2)	ENSDARG00000039240	12.8797	20.6826	5.07673	0.245459	-2.02645	0.0347799	0.89118
rfesd	ENSDARG00000058725	12.8797	20.6826	5.07673	0.245459	-2.02645	0.0347799	0.89118
BX005022.1	ENSDARG00000069459	33.7247	18.7128	48.7366	2.60445	1.38098	0.0357038	0.89347
kif17	ENSDARG00000055238	33.7247	18.7128	48.7366	2.60445	1.38098	0.0357038	0.89347
si:dkey-103j14.4	ENSDARG00000093705	62.3423	39.3954	85.2891	2.16495	1.11433	0.0354406	0.89347
poglut1	ENSDARG00000053463	117.024	81.7455	152.302	1.86312	0.897723	0.0359428	0.89347
aurka	ENSDARG00000012485	127.055	89.6246	164.486	1.83528	0.875999	0.0355112	0.89347
slc34a1a	ENSDARG00000028824	154.135	111.292	196.977	1.76991	0.823677	0.0357204	0.89347
pnp6	ENSDARG00000040942	252.913	191.068	314.757	1.64736	0.720155	0.0358083	0.89347
atpif1a	ENSDARG00000067975	486.026	382.136	589.916	1.54373	0.626425	0.0359454	0.89347
mlec	ENSDARG00000059630	494.55	389.03	600.07	1.54248	0.625249	0.0357662	0.89347
otof	ENSDARG00000030832	506.582	398.879	614.284	1.54003	0.622957	0.0357278	0.89347
grk1b	ENSDARG00000011184	863.014	691.39	1034.64	1.49646	0.581554	0.0358513	0.89347
hmgcs1	ENSDARG00000052738	1445.07	1167.09	1723.04	1.47636	0.562043	0.0357276	0.89347
nfe2l2a	ENSDARG00000042824	1524.29	1231.11	1817.47	1.47629	0.561975	0.0354038	0.89347
paics	ENSDARG00000033539	1098.61	1312.85	884.367	0.673622	-0.569989	0.0359007	0.89347
PCDHAC2 (2 of 2)	ENSDARG00000092081	460.932	560.4	361.463	0.645009	-0.632608	0.0358475	0.89347
scamp5	ENSDARG00000018743	425.527	519.035	332.018	0.639684	-0.644569	0.0350239	0.89347
SMARCAD1 (2 of 2)	ENSDARG00000073721	306.371	378.196	234.545	0.620168	-0.68927	0.0357319	0.89347
DNER	ENSDARG00000061031	236.576	295.466	177.686	0.601375	-0.733664	0.0355411	0.89347
TNNC2 (2 of 2)	ENSDARG00000095002	229.098	286.602	171.594	0.598718	-0.740053	0.0354428	0.89347
ankrd9	ENSDARG00000028804	221.62	277.738	165.501	0.595891	-0.74688	0.0353206	0.89347
ntng1a	ENSDARG00000014973	211.649	265.919	157.379	0.591829	-0.756748	0.0351149	0.89347
NUAK1 (1 of 2)	ENSDARG00000020086	145.854	187.128	104.581	0.558871	-0.839412	0.0354947	0.89347
scn1bb	ENSDARG00000071252	113.957	148.718	79.197	0.532532	-0.909059	0.0354417	0.89347
MYO18B (3 of 4)	ENSDARG00000090163	17.8498	27.5768	8.12277	0.294551	-1.76341	0.0353845	0.89347
pdcb	ENSDARG00000017634	1099.64	885.412	1313.86	1.48389	0.569388	0.0360525	0.895113
crp7	ENSDARG00000071456	103.494	135.914	71.0742	0.522934	-0.935298	0.036143	0.896338
slc37a4b	ENSDARG00000077180	459.439	558.43	360.448	0.645466	-0.631586	0.0362497	0.897962
BX005423.1	ENSDARG00000051709	14.1235	5.90931	22.3376	3.78007	1.91841	0.0365305	0.898372
CMAS (3 of 3)	ENSDARG00000091267	14.1235	5.90931	22.3376	3.78007	1.91841	0.0365305	0.898372
trpm5	ENSDARG00000059792	80.4053	53.1838	107.627	2.02367	1.01698	0.0363576	0.898372
diaph3	ENSDARG00000090785	213.801	159.551	268.051	1.68003	0.748487	0.0365244	0.898372
fbxo41	ENSDARG00000078908	179.752	227.509	131.995	0.580176	-0.785438	0.0363979	0.898372
SLITRK4	ENSDARG00000079781	144.362	185.159	103.565	0.559333	-0.83822	0.0363393	0.898372
ryr2b	ENSDARG00000003706	93.0311	123.111	62.9515	0.51134	-0.967645	0.0365547	0.898372
cacna2d1a	ENSDARG00000014804	752.113	903.14	601.085	0.66555	-0.587381	0.0367107	0.901189
ptf1a	ENSDARG00000014479	30.7091	16.7431	44.6752	2.66828	1.41591	0.0373204	0.902085
prr15la	ENSDARG00000025615	63.3424	40.3803	86.3044	2.13729	1.09578	0.0375247	0.902085
CRP	ENSDARG00000045089	107.992	74.8513	141.133	1.88551	0.914957	0.0373704	0.902085
MYO5B (1 of 3)	ENSDARG00000061810	136.579	97.5037	175.655	1.80152	0.849215	0.0369796	0.902085
abcg2b	ENSDARG00000079361	142.595	102.428	182.762	1.7843	0.835357	0.0375334	0.902085
fhdc1	ENSDARG00000074812	158.643	115.232	202.054	1.75346	0.810203	0.0371798	0.902085
KIF20B	ENSDARG00000071009	206.278	153.642	258.913	1.68517	0.752895	0.0371895	0.902085
tmlhe	ENSDARG00000077547	391.771	305.315	478.228	1.56635	0.647402	0.0370216	0.902085
tspan7b	ENSDARG00000008407	1038.31	1239.97	836.645	0.67473	-0.567619	0.0374456	0.902085
BAI1 (3 of 3)	ENSDARG00000078529	578.61	698.284	458.936	0.657235	-0.60552	0.0373129	0.902085
lhx1a	ENSDARG00000014018	362.717	444.183	281.251	0.633186	-0.659298	0.0373275	0.902085
rbm24b	ENSDARG00000031809	331.805	407.743	255.867	0.627521	-0.672264	0.0371442	0.902085
fam5b	ENSDARG00000014302	232.098	289.556	174.64	0.603128	-0.729464	0.0375065	0.902085
frem2a	ENSDARG00000076856	231.098	288.572	173.624	0.601668	-0.732961	0.0368127	0.902085
ROBO3 (2 of 3)	ENSDARG00000042646	140.377	180.234	100.519	0.557715	-0.8424	0.0370377	0.902085
gpr22	ENSDARG00000004592	95.5238	126.065	64.9822	0.515464	-0.956057	0.0371162	0.902085
cax1	ENSDARG00000045601	89.0459	118.186	59.9054	0.506873	-0.980304	0.0369207	0.902085
pcdh2g29	ENSDARG00000076707	38.7456	55.1536	22.3376	0.405007	-1.30398	0.0374526	0.902085
si:ch211-215c18.3	ENSDARG00000095308	19.3423	29.5466	9.13812	0.309278	-1.69302	0.0369339	0.902085
GRIK3	ENSDARG00000077715	262.01	325.012	199.008	0.612309	-0.707669	0.0375802	0.902213
clic5b	ENSDARG00000070584	253.405	192.053	314.757	1.63891	0.712737	0.0376546	0.903007
si:dkeyp-13d11.1	ENSDARG00000076343	15.6313	6.8942	24.3683	3.53461	1.82155	0.0382684	0.904786
si:dkey-92i17.2	ENSDARG00000093612	29.2014	15.7582	42.6445	2.70619	1.43626	0.0380694	0.904786
PRTFDC1 (2 of 2)	ENSDARG00000074528	83.9133	56.1385	111.688	1.98951	0.992413	0.0382003	0.904786
zgc:101788	ENSDARG00000055644	204.77	152.657	256.883	1.68274	0.750813	0.0380843	0.904786
cdx1b	ENSDARG00000058999	323.088	249.176	397	1.59325	0.671975	0.0382248	0.904786
kif1ab	ENSDARG00000062024	1075.71	1283.31	868.121	0.676472	-0.563897	0.0382026	0.904786
homer1b	ENSDARG00000007517	230.605	287.587	173.624	0.603728	-0.728029	0.0381937	0.904786
il1rapl2	ENSDARG00000037553	225.62	281.677	169.563	0.601975	-0.732224	0.0381615	0.904786
zfand1	ENSDARG00000009178	87.5533	116.217	58.8901	0.506727	-0.980719	0.0379263	0.904786
nrn1lb	ENSDARG00000061149	83.5681	111.292	55.844	0.501779	-0.994876	0.0382346	0.904786
npy	ENSDARG00000036222	37.2531	53.1838	21.3223	0.400916	-1.31863	0.0379938	0.904786
hapln4	ENSDARG00000018542	37.2531	53.1838	21.3223	0.400916	-1.31863	0.0379938	0.904786
PDE9A (2 of 4)	ENSDARG00000075929	20.8349	31.5163	10.1535	0.322165	-1.63413	0.0380978	0.904786
gng12a	ENSDARG00000003375	202.262	150.688	253.837	1.68452	0.75234	0.0383233	0.9049
TULP1 (2 of 2)	ENSDARG00000078210	356.676	276.753	436.599	1.57758	0.65771	0.0383562	0.9049
PDE6H	ENSDARG00000056791	143.595	103.413	183.778	1.77712	0.829544	0.0384507	0.905169
IMPG2 (2 of 4)	ENSDARG00000071099	562.202	446.153	678.251	1.52022	0.60428	0.0384473	0.905169
nab1a	ENSDARG00000042940	71.6124	96.5188	46.7059	0.483905	-1.0472	0.0385144	0.90569
SDR42E2	ENSDARG00000059914	108.992	75.8362	142.148	1.87441	0.90644	0.038561	0.90581
zgc:194314	ENSDARG00000078859	27.6936	14.7733	40.6138	2.74914	1.45898	0.0387564	0.907252
gbgt1l1	ENSDARG00000025275	36.2326	20.6826	51.7827	2.50368	1.32405	0.0386686	0.907252
gk5	ENSDARG00000062864	402.788	315.163	490.412	1.55606	0.637895	0.0388305	0.907252
zgc:91999	ENSDARG00000046122	324.835	398.879	250.791	0.628739	-0.669468	0.038811	0.907252
cbln1	ENSDARG00000057296	211.664	264.934	158.394	0.597861	-0.742117	0.038768	0.907252
sstr1a	ENSDARG00000003049	22.3275	33.4861	11.1688	0.333535	-1.58409	0.0389404	0.908845
shbg	ENSDARG00000019492	458.931	361.453	556.41	1.53937	0.622339	0.0390225	0.909302
IMPG2 (4 of 4)	ENSDARG00000094099	561.695	446.153	677.236	1.51794	0.602119	0.0391685	0.909302
slc12a5a	ENSDARG00000075815	299.908	369.332	230.484	0.624055	-0.680255	0.0391262	0.909302
shox2	ENSDARG00000075713	99.0166	130.005	68.0282	0.523274	-0.934362	0.0391566	0.909302
si:ch211-286e11.3	ENSDARG00000094260	10.8947	17.7279	4.06138	0.229095	-2.12598	0.0390771	0.909302
C5H9orf117	ENSDARG00000090068	26.1858	13.7884	38.5832	2.79823	1.48452	0.0393592	0.909989
guk1a	ENSDARG00000030340	636.886	508.201	765.571	1.50643	0.591137	0.0393369	0.909989
rcv1	ENSDARG00000019902	1421.93	1153.3	1690.55	1.46584	0.551724	0.0393651	0.909989
GRID1 (2 of 2)	ENSDARG00000074583	128.421	165.461	91.3812	0.552283	-0.856521	0.0392689	0.909989
si:ch211-218d20.10	ENSDARG00000093137	10.6002	3.93954	17.2609	4.38144	2.13141	0.0397813	0.912184
ca4c	ENSDARG00000044512	10.6002	3.93954	17.2609	4.38144	2.13141	0.0397813	0.912184
cdkn2d	ENSDARG00000094176	24.678	12.8035	36.5525	2.85488	1.51343	0.0398554	0.912184
hnf1bb	ENSDARG00000022295	53.8032	33.4861	74.1203	2.21346	1.14631	0.0395924	0.912184
si:ch211-222k6.3	ENSDARG00000071578	53.8032	33.4861	74.1203	2.21346	1.14631	0.0395924	0.912184
kif2c	ENSDARG00000076228	233.342	176.295	290.389	1.64718	0.719999	0.0396503	0.912184
hmp19	ENSDARG00000053663	772.592	924.808	620.377	0.670817	-0.576009	0.0398968	0.912184
tln2a	ENSDARG00000017901	728.216	872.609	583.824	0.669056	-0.579801	0.0399203	0.912184
RAPGEF4 (1 of 2)	ENSDARG00000075924	334.313	409.712	258.913	0.631939	-0.662143	0.0397581	0.912184
dkk1b	ENSDARG00000045219	31.2828	45.3047	17.2609	0.380995	-1.39216	0.0396804	0.912184
VWA5A (3 of 4)	ENSDARG00000088917	29.7903	43.335	16.2455	0.374883	-1.41549	0.0399172	0.912184
wisp1b	ENSDARG00000076685	28.2977	41.3652	15.2302	0.368189	-1.44148	0.0400444	0.91406
CNBD1	ENSDARG00000091489	23.1702	11.8186	34.5218	2.92096	1.54644	0.0402205	0.914163
ADCY3	ENSDARG00000077145	441.021	534.793	347.248	0.649314	-0.623013	0.0402554	0.914163
lhfpl4a	ENSDARG00000078998	311.879	383.121	240.637	0.628097	-0.67094	0.0401211	0.914163
BX000430.1	ENSDARG00000028552	162.318	205.841	118.796	0.577122	-0.793051	0.0401513	0.914163
CABZ01084273.1	ENSDARG00000090064	91.0461	120.156	61.9361	0.515464	-0.956057	0.0402586	0.914163
mybl1	ENSDARG00000030999	121.024	85.6851	156.363	1.82486	0.867786	0.0403022	0.914201
si:dkey-233h12.1	ENSDARG00000094174	80.5829	107.353	53.8133	0.501277	-0.996321	0.0403629	0.914628
casc5	ENSDARG00000070239	294.501	226.524	362.479	1.60018	0.678234	0.0404255	0.915095
gda	ENSDARG00000002986	522.583	414.637	630.53	1.52068	0.604716	0.0404799	0.915375
dnm1b	ENSDARG00000009281	1023.4	1219.29	827.507	0.67868	-0.559196	0.0405708	0.916479
zgc:153738	ENSDARG00000069230	33.217	18.7128	47.7213	2.55019	1.3506	0.0408463	0.917797
ropn1l	ENSDARG00000058370	33.217	18.7128	47.7213	2.55019	1.3506	0.0408463	0.917797
CCDC135	ENSDARG00000075654	56.3111	35.4559	77.1663	2.1764	1.12195	0.0407175	0.917797
inip	ENSDARG00000028523	88.4214	60.078	116.765	1.94355	0.958696	0.0414634	0.917797
cers3b	ENSDARG00000036337	127.04	90.6095	163.471	1.80412	0.851298	0.0409826	0.917797
slc35e3	ENSDARG00000045493	133.056	95.5339	170.578	1.78552	0.836348	0.0415627	0.917797
zgc:113516	ENSDARG00000008035	155.12	113.262	196.977	1.73913	0.798366	0.0413539	0.917797
C2	ENSDARG00000019772	192.723	143.793	241.652	1.68055	0.748937	0.0417874	0.917797
si:dkeyp-89c11.1	ENSDARG00000069292	218.294	164.476	272.113	1.65442	0.726328	0.041303	0.917797
cmyb	ENSDARG00000053666	256.898	195.992	317.803	1.62151	0.697338	0.0412826	0.917797
igfbp1a	ENSDARG00000014947	263.914	201.902	325.926	1.61428	0.690893	0.0418501	0.917797
zgc:172253	ENSDARG00000074191	327.581	254.101	401.062	1.57836	0.658425	0.0416622	0.917797
ERICH1	ENSDARG00000078130	393.249	308.269	478.228	1.55133	0.633508	0.0411049	0.917797
tbx2a	ENSDARG00000018025	418.312	328.952	507.673	1.54331	0.626023	0.0411415	0.917797
zgc:64189	ENSDARG00000033501	494.504	391.985	597.024	1.52308	0.606991	0.0414968	0.917797
alyref	ENSDARG00000077732	1373.75	1116.86	1630.65	1.46003	0.545995	0.0417404	0.917797
TAF15	ENSDARG00000070019	2057.58	1675.29	2439.88	1.45639	0.542397	0.0413586	0.917797
CT956064.4	ENSDARG00000088494	932.169	1110.95	753.387	0.678146	-0.560333	0.041716	0.917797
kiaa1549la	ENSDARG00000062477	682.363	817.455	547.272	0.669482	-0.578883	0.0418078	0.917797
syngr3a	ENSDARG00000014871	527.787	636.236	419.338	0.659092	-0.601449	0.0413208	0.917797
lrp1bb	ENSDARG00000061517	516.816	623.433	410.2	0.65797	-0.603907	0.041161	0.917797
ENSDARG00000088330	ENSDARG00000088330	417.094	506.231	327.957	0.64784	-0.626291	0.0412405	0.917797
gnb5a	ENSDARG00000092921	291.445	358.498	224.392	0.62592	-0.675949	0.0416818	0.917797
slc35g2b	ENSDARG00000045447	193.231	242.282	144.179	0.595088	-0.748824	0.0418105	0.917797
lrp1ba	ENSDARG00000094171	136.899	175.31	98.4886	0.561798	-0.831877	0.0410011	0.917797
mmp16b	ENSDARG00000058876	116.465	150.688	82.243	0.545785	-0.873594	0.0416857	0.917797
si:ch73-211l13.8	ENSDARG00000095850	105.002	136.899	73.1049	0.534006	-0.905073	0.0415243	0.917797
ahsa1	ENSDARG00000028664	96.0314	126.065	65.9975	0.523518	-0.933689	0.0413491	0.917797
ENSDARG00000088801	ENSDARG00000088801	75.1052	100.458	49.752	0.49525	-1.01377	0.041692	0.917797
gh1	ENSDARG00000038185	118.958	153.642	84.2737	0.548506	-0.866419	0.0419416	0.91888
plk2b	ENSDARG00000019130	273.996	337.816	210.177	0.622163	-0.684634	0.0419985	0.919202
CU184872.1	ENSDARG00000069291	52.1939	71.8967	32.4911	0.451914	-1.14588	0.0420733	0.919917
CU633479.6	ENSDARG00000093148	786.579	939.581	633.576	0.674318	-0.5685	0.0421451	0.920563
CABZ01076275.1	ENSDARG00000059295	1692.58	1378.84	2006.32	1.45508	0.541099	0.0422035	0.920916
ENSDARG00000077704	ENSDARG00000077704	12.108	4.92443	19.2916	3.91753	1.96994	0.0433758	0.922376
si:ch211-223a21.1	ENSDARG00000089708	12.108	4.92443	19.2916	3.91753	1.96994	0.0433758	0.922376
CR318624.1	ENSDARG00000086451	12.108	4.92443	19.2916	3.91753	1.96994	0.0433758	0.922376
axdnd1	ENSDARG00000062355	79.3899	53.1838	105.596	1.98549	0.989496	0.0425064	0.922376
DNAH10	ENSDARG00000061486	115.501	81.7455	149.256	1.82586	0.868576	0.0432273	0.922376
si:ch211-175f12.2	ENSDARG00000095831	126.532	90.6095	162.455	1.79292	0.842309	0.0434117	0.922376
hnmt	ENSDARG00000012796	191.215	142.808	239.622	1.67792	0.746677	0.0428435	0.922376
cdk2	ENSDARG00000026577	199.739	149.703	249.775	1.66848	0.73853	0.0426789	0.922376
si:ch211-69i14.10	ENSDARG00000094561	226.311	171.37	281.251	1.64119	0.714742	0.0426904	0.922376
zgc:153031	ENSDARG00000068876	246.866	188.113	305.619	1.62466	0.700134	0.0424494	0.922376
m6pr	ENSDARG00000018432	268.422	205.841	331.003	1.60805	0.685312	0.042685	0.922376
utp3	ENSDARG00000056720	325.566	253.116	398.016	1.57247	0.653029	0.0436326	0.922376
ttk	ENSDARG00000041361	335.597	260.995	410.2	1.57168	0.652306	0.0425189	0.922376
slc4a2a	ENSDARG00000028173	437.345	345.695	528.995	1.53024	0.613756	0.0435393	0.922376
si:dkey-206f10.1	ENSDARG00000032838	456.393	361.453	551.333	1.52532	0.609115	0.0435534	0.922376
guk1b	ENSDARG00000005776	523.568	416.607	630.53	1.51349	0.597879	0.0427291	0.922376
kpna2	ENSDARG00000038066	791.239	638.206	944.272	1.47957	0.56518	0.0431781	0.922376
cyb5a	ENSDARG00000055643	916.558	741.619	1091.5	1.47178	0.557558	0.0430043	0.922376
prph2a	ENSDARG00000038018	1353.18	1101.1	1605.26	1.45787	0.543861	0.0426826	0.922376
jph2	ENSDARG00000028625	1355	1607.33	1102.67	0.686022	-0.543674	0.0427685	0.922376
ENSDARG00000076126	ENSDARG00000076126	1080.27	1284.29	876.244	0.682278	-0.551568	0.0425414	0.922376
sorl1	ENSDARG00000013892	846.926	1009.51	684.343	0.677898	-0.56086	0.0433658	0.922376
si:ch211-226o13.2	ENSDARG00000089875	591.627	710.103	473.151	0.666314	-0.585726	0.0432848	0.922376
obsl1b	ENSDARG00000077388	557.222	669.722	444.722	0.664039	-0.590661	0.043345	0.922376
cdh13	ENSDARG00000014215	496.89	598.811	394.97	0.65959	-0.600358	0.0436668	0.922376
adam10b	ENSDARG00000015502	478.934	578.128	379.739	0.656843	-0.606379	0.042853	0.922376
cacna1ba	ENSDARG00000021735	405.138	491.458	318.819	0.64872	-0.624332	0.0429996	0.922376
RASGRF1	ENSDARG00000073824	229.128	284.632	173.624	0.609995	-0.71313	0.0426284	0.922376
TRIM63 (2 of 2)	ENSDARG00000086685	205.201	256.07	154.333	0.602696	-0.730497	0.0435897	0.922376
rgs16	ENSDARG00000040177	141.392	180.234	102.55	0.568982	-0.813545	0.0434789	0.922376
KCNAB1 (2 of 3)	ENSDARG00000040741	122.451	157.582	87.3198	0.554124	-0.85172	0.043508	0.922376
adcy2a	ENSDARG00000058392	119.958	154.627	85.2891	0.551579	-0.85836	0.0432938	0.922376
CRHR2	ENSDARG00000062377	43.731	61.0629	26.399	0.432325	-1.20981	0.0436386	0.922376
TULP1 (1 of 2)	ENSDARG00000075295	319.55	248.191	390.908	1.57503	0.655378	0.043725	0.922712
C1H7orf55	ENSDARG00000019765	765.667	617.523	913.812	1.4798	0.565403	0.0438403	0.923356
BAD (2 of 2)	ENSDARG00000087993	76.1053	101.443	50.7673	0.50045	-0.998701	0.0438304	0.923356
ABTB1	ENSDARG00000063354	113.48	146.748	80.2123	0.546599	-0.871444	0.0439616	0.925019
si:ch211-255p10.3	ENSDARG00000096616	434.066	524.944	343.187	0.653759	-0.613169	0.0440999	0.92525
ENSDARG00000087114	ENSDARG00000087114	54.6865	74.8513	34.5218	0.461205	-1.11652	0.0440671	0.92525
tmem240	ENSDARG00000087916	54.6865	74.8513	34.5218	0.461205	-1.11652	0.0440671	0.92525
pdha1b	ENSDARG00000010555	164.136	121.141	207.131	1.70983	0.773854	0.0443355	0.92659
si:dkey-14d8.6	ENSDARG00000045835	277.438	213.72	341.156	1.59628	0.67471	0.0443161	0.92659
gucy1b3	ENSDARG00000086790	259.548	320.088	199.008	0.621729	-0.685643	0.0443764	0.92659
pafah1b2	ENSDARG00000035352	216.172	268.874	163.471	0.607983	-0.717897	0.0443661	0.92659
PEG3 (11 of 51)	ENSDARG00000077017	18.8499	28.5617	9.13812	0.319943	-1.64411	0.044256	0.92659
plk1	ENSDARG00000058471	526.061	419.561	632.561	1.50767	0.592322	0.0445293	0.928895
wibg	ENSDARG00000046024	161.628	119.171	204.085	1.71253	0.776132	0.0446688	0.930914
cnga1	ENSDARG00000012125	125.025	89.6246	160.425	1.78996	0.839929	0.0448204	0.932702
kdrl	ENSDARG00000015815	572.193	686.465	457.921	0.667071	-0.584088	0.044883	0.932702
TMEM8B (1 of 2)	ENSDARG00000075126	123.451	158.567	88.3351	0.557085	-0.84403	0.0448553	0.932702
ENSDARG00000089192	ENSDARG00000089192	39.7406	23.6373	55.844	2.36254	1.24034	0.0450777	0.934257
ENSDARG00000077349	ENSDARG00000077349	100.524	130.99	70.0589	0.534842	-0.902815	0.0450853	0.934257
NRSN2	ENSDARG00000056572	62.657	84.7002	40.6138	0.479501	-1.06039	0.0450864	0.934257
muc13b	ENSDARG00000079647	717.032	578.128	855.937	1.48053	0.566115	0.045162	0.934935
rab38b	ENSDARG00000069159	34.2172	19.6977	48.7366	2.47423	1.30698	0.0453044	0.936993
sox19a	ENSDARG00000010770	257.883	197.962	317.803	1.60538	0.682911	0.0454441	0.938991
mis18a	ENSDARG00000035333	43.7563	26.5919	60.9208	2.29095	1.19595	0.0455904	0.941122
plcg2	ENSDARG00000068763	201.231	151.672	250.791	1.6535	0.725524	0.0460109	0.942523
si:ch73-353p21.5	ENSDARG00000077631	215.771	163.491	268.051	1.63955	0.713298	0.0457093	0.942523
BX248120.1	ENSDARG00000088839	317.534	247.206	387.862	1.56898	0.649829	0.0458275	0.942523
acy3.2	ENSDARG00000005525	472.918	376.226	569.609	1.51401	0.598371	0.0460474	0.942523
hprt1	ENSDARG00000008884	559.633	448.123	671.144	1.49768	0.582727	0.0460212	0.942523
lztfl1	ENSDARG00000041997	1541.53	1823.02	1260.04	0.691184	-0.532858	0.0459658	0.942523
olfm1a	ENSDARG00000018270	342.821	417.592	268.051	0.641898	-0.639583	0.0458203	0.942523
ndufv3	ENSDARG00000090389	145.885	185.159	106.611	0.575784	-0.7964	0.0459339	0.942523
SLC46A3 (2 of 2)	ENSDARG00000079933	96.5391	126.065	67.0128	0.531572	-0.911663	0.0459339	0.942523
C20H6orf58 (1 of 2)	ENSDARG00000090722	403.661	488.503	318.819	0.652644	-0.615632	0.0461231	0.943187
SLC47A1 (4 of 6)	ENSDARG00000079340	240.835	184.174	297.496	1.6153	0.691806	0.0462736	0.945163
CR762408.1	ENSDARG00000062723	23.3276	34.471	12.1842	0.353461	-1.50038	0.0463064	0.945163
syt9a	ENSDARG00000003994	126.944	162.506	91.3812	0.562324	-0.830526	0.0463717	0.945609
smyhc2	ENSDARG00000071433	2665.79	3151.63	2179.95	0.691688	-0.531806	0.0464533	0.946388
EFCAB10	ENSDARG00000092825	15.1236	6.8942	23.353	3.38733	1.76015	0.0473012	0.950375
zgc:198241	ENSDARG00000076483	24.1703	12.8035	35.5371	2.77557	1.47279	0.0467975	0.950375
tmem243a	ENSDARG00000042214	32.7094	18.7128	46.7059	2.49593	1.31958	0.0466955	0.950375
pcgf5b	ENSDARG00000052388	50.2799	31.5163	69.0435	2.19072	1.13141	0.047067	0.950375
ENSDARG00000086603	ENSDARG00000086603	144.073	105.383	182.762	1.73427	0.794329	0.0471625	0.950375
KYNU (1 of 2)	ENSDARG00000028345	193.708	145.763	241.652	1.65784	0.729308	0.0471097	0.950375
dlb	ENSDARG00000004232	284.947	220.614	349.279	1.58321	0.662853	0.0467959	0.950375
ugt5b2	ENSDARG00000091916	488.95	390.015	587.885	1.50734	0.592006	0.0471712	0.950375
plekho1b	ENSDARG00000077499	691.953	558.43	825.476	1.47821	0.56385	0.0469581	0.950375
slc25a1b	ENSDARG00000076381	766.637	620.478	912.796	1.47112	0.556913	0.0470613	0.950375
calrl	ENSDARG00000020103	1951.65	1598.47	2304.84	1.4419	0.527973	0.0470506	0.950375
SYNGAP1 (1 of 2)	ENSDARG00000063713	692.887	826.319	559.456	0.677046	-0.562675	0.0474337	0.950375
scdb	ENSDARG00000030265	467.993	563.355	372.632	0.661452	-0.596292	0.0472685	0.950375
BRINP1	ENSDARG00000078302	394.69	477.67	311.711	0.652567	-0.615803	0.047003	0.950375
slc25a1a	ENSDARG00000057110	240.114	296.451	183.778	0.619927	-0.68983	0.0471847	0.950375
MPP3 (1 of 2)	ENSDARG00000015184	232.636	287.587	177.686	0.617851	-0.69467	0.0473965	0.950375
FP102463.1	ENSDARG00000086257	164.334	206.826	121.842	0.589102	-0.763412	0.0473489	0.950375
kcnc3b	ENSDARG00000037933	159.348	200.917	117.78	0.586214	-0.770501	0.0473121	0.950375
reep6	ENSDARG00000087349	77.3745	52.1989	102.55	1.9646	0.974234	0.0476507	0.951227
pop7	ENSDARG00000036394	109.002	140.839	77.1663	0.547906	-0.868	0.0476944	0.951227
ccdc85a	ENSDARG00000039497	97.5392	127.05	68.0282	0.535443	-0.901195	0.0476834	0.951227
B4GALNT1 (2 of 2)	ENSDARG00000077352	71.6276	95.5339	47.7213	0.499522	-1.00138	0.0476568	0.951227
ELOVL4 (3 of 3)	ENSDARG00000093260	50.2089	68.942	31.4757	0.456554	-1.13114	0.047598	0.951227
TSG101 (3 of 5)	ENSDARG00000070529	16.6314	7.87909	25.3837	3.22165	1.6878	0.0481394	0.951397
upp2	ENSDARG00000036833	21.1547	10.8337	31.4757	2.90534	1.53871	0.0480725	0.951397
cx50.5	ENSDARG00000069451	21.1547	10.8337	31.4757	2.90534	1.53871	0.0480725	0.951397
slc1a8a	ENSDARG00000034628	271.407	209.781	333.034	1.58753	0.666786	0.0479974	0.951397
rcvrna	ENSDARG00000052223	656.858	529.869	783.847	1.47932	0.564938	0.0479732	0.951397
calb2b	ENSDARG00000036344	667.961	796.773	539.149	0.676666	-0.563484	0.0481262	0.951397
ACTL7B	ENSDARG00000004658	407.661	492.443	322.88	0.65567	-0.608958	0.0481078	0.951397
cacna2d3	ENSDARG00000078760	236.129	291.526	180.732	0.61995	-0.689777	0.0481297	0.951397
grm2a	ENSDARG00000004150	111.495	143.793	79.197	0.55077	-0.860479	0.047949	0.951397
UBASH3B (2 of 2)	ENSDARG00000077399	63.6571	85.6851	41.6292	0.48584	-1.04145	0.0478032	0.951397
pbk	ENSDARG00000007221	145.073	106.368	183.778	1.72776	0.788902	0.0482053	0.95142
speg	ENSDARG00000039256	328.373	399.864	256.883	0.642425	-0.638399	0.0482279	0.95142
ppp2r3a	ENSDARG00000077722	502.906	603.735	402.077	0.665983	-0.586443	0.0483195	0.951506
tcap	ENSDARG00000007344	145.392	184.174	106.611	0.578863	-0.788706	0.0482897	0.951506
FGD5 (1 of 2)	ENSDARG00000070653	102.525	132.96	72.0896	0.542192	-0.883125	0.0484297	0.951957
chrna3	ENSDARG00000054497	54.1941	73.8664	34.5218	0.467354	-1.09741	0.048423	0.951957
nr5a2	ENSDARG00000042556	306.995	239.327	374.663	1.56548	0.646608	0.0485548	0.952696
lin7a	ENSDARG00000013414	557.76	667.753	447.768	0.670559	-0.576563	0.0485369	0.952696
mvb12bb	ENSDARG00000079478	100.946	70.9118	130.98	1.84708	0.885246	0.0488313	0.955728
mlc1	ENSDARG00000063026	140.057	102.428	177.686	1.73473	0.794715	0.0490075	0.955728
si:dkey-239i20.2	ENSDARG00000043518	175.152	130.99	219.315	1.67429	0.743548	0.0489786	0.955728
serpind1	ENSDARG00000021208	480.919	384.105	577.732	1.5041	0.588898	0.0489533	0.955728
aqp9b	ENSDARG00000053480	653.842	527.899	779.786	1.47715	0.562817	0.0489478	0.955728
agxta	ENSDARG00000052099	758.098	614.569	901.627	1.46709	0.552957	0.048923	0.955728
si:dkeyp-77c8.1	ENSDARG00000093940	80.5982	106.368	54.8287	0.515464	-0.956057	0.0490162	0.955728
fbxl8	ENSDARG00000054222	73.3588	49.2443	97.4732	1.97938	0.98505	0.0492142	0.956096
ppp1r2	ENSDARG00000054007	248.344	191.068	305.619	1.59953	0.67765	0.0491704	0.956096
si:ch211-198j3.1	ENSDARG00000094581	353.107	277.738	428.476	1.54274	0.625491	0.0492982	0.956096
si:dkey-235h8.1	ENSDARG00000095906	381.679	301.375	461.983	1.53292	0.616278	0.0491328	0.956096
anp32b	ENSDARG00000023330	996.182	812.531	1179.83	1.45205	0.538087	0.049172	0.956096
sept5a	ENSDARG00000013843	287.49	351.604	223.376	0.635306	-0.654477	0.0492783	0.956096
tm4sf5	ENSDARG00000055185	214.756	163.491	266.021	1.62713	0.702327	0.0494046	0.956308
slc38a4	ENSDARG00000018149	2370.2	1945.15	2795.25	1.43704	0.523095	0.0494408	0.956308
fxyd6	ENSDARG00000095094	183.783	229.478	138.087	0.601743	-0.73278	0.0494036	0.956308
pdap1a	ENSDARG00000092546	714.986	579.113	850.86	1.46925	0.555077	0.0495791	0.958133
CR293523.1	ENSDARG00000081153	10.0925	3.93954	16.2455	4.12371	2.04394	0.0518295	0.959284
ENSDARG00000074707	ENSDARG00000074707	10.0925	3.93954	16.2455	4.12371	2.04394	0.0518295	0.959284
xrra1	ENSDARG00000089578	11.6003	4.92443	18.2762	3.71134	1.89194	0.0553195	0.959284
BX323444.2	ENSDARG00000087019	11.6003	4.92443	18.2762	3.71134	1.89194	0.0553195	0.959284
C10H11orf63	ENSDARG00000068982	36.2174	21.6675	50.7673	2.34302	1.22837	0.054568	0.959284
si:dkey-61n16.5	ENSDARG00000094702	43.2487	26.5919	59.9054	2.25277	1.1717	0.0509711	0.959284
si:dkey-66i24.9	ENSDARG00000096689	45.7566	28.5617	62.9515	2.20405	1.14016	0.0526988	0.959284
nme5	ENSDARG00000041617	45.7566	28.5617	62.9515	2.20405	1.14016	0.0526988	0.959284
cks2	ENSDARG00000071410	48.2645	30.5315	65.9975	2.16162	1.11211	0.0541746	0.959284
CABZ01115256.1	ENSDARG00000087135	51.2801	32.5012	70.0589	2.15558	1.10807	0.0501599	0.959284
lrrc6	ENSDARG00000053318	52.2802	33.4861	71.0742	2.1225	1.08576	0.0533004	0.959284
btr06	ENSDARG00000054184	57.8037	37.4257	78.1817	2.08899	1.0628	0.0502734	0.959284
DGKA (1 of 2)	ENSDARG00000002898	64.3273	42.3501	86.3044	2.03788	1.02707	0.049782	0.959284
rpgra	ENSDARG00000056617	63.8196	42.3501	85.2891	2.01391	1.01	0.054284	0.959284
dnajc22	ENSDARG00000037067	74.3589	50.2292	98.4886	1.96078	0.971431	0.0513336	0.959284
zgc:153650	ENSDARG00000013525	81.8826	56.1385	107.627	1.91716	0.938974	0.0516131	0.959284
mns1	ENSDARG00000060169	86.8984	60.078	113.719	1.89285	0.920561	0.051507	0.959284
si:ch211-139k8.2	ENSDARG00000091946	87.8985	61.0629	114.734	1.87895	0.909926	0.0533106	0.959284
CCDC150	ENSDARG00000090935	86.3907	60.078	112.703	1.87595	0.907622	0.0553245	0.959284
skp2	ENSDARG00000004937	91.4065	64.0176	118.796	1.85567	0.89194	0.0548944	0.959284
f11rl	ENSDARG00000068114	96.4223	67.9571	124.888	1.83774	0.877933	0.0543402	0.959284
ercc1	ENSDARG00000031680	126.01	91.5944	160.425	1.75147	0.808565	0.0527668	0.959284
BX004880.1	ENSDARG00000062913	137.041	100.458	173.624	1.72832	0.789371	0.0521198	0.959284
cdc14aa	ENSDARG00000013858	144.057	106.368	181.747	1.70867	0.772872	0.0534244	0.959284
chek2	ENSDARG00000025820	148.565	110.307	186.824	1.69367	0.76015	0.0551326	0.959284
CU462878.1	ENSDARG00000090072	155.089	115.232	194.946	1.69178	0.758541	0.0525351	0.959284
GADD45G (1 of 3)	ENSDARG00000016725	156.089	116.217	195.962	1.68618	0.753757	0.0535757	0.959284
si:ch211-217k17.3	ENSDARG00000095518	177.153	132.96	221.345	1.66476	0.735312	0.0507874	0.959284
NIPAL4	ENSDARG00000059365	186.676	140.839	232.514	1.65093	0.723276	0.0512538	0.959284
MFN1 (2 of 4)	ENSDARG00000011884	208.725	159.551	257.898	1.61639	0.692778	0.0543388	0.959284
gltpa	ENSDARG00000061921	211.233	161.521	260.944	1.61554	0.692016	0.0538506	0.959284
hydin	ENSDARG00000056764	227.788	174.325	281.251	1.61337	0.69008	0.049952	0.959284
si:dkey-204f11.64	ENSDARG00000094695	226.772	174.325	279.22	1.60172	0.679626	0.0537795	0.959284
arhgap19	ENSDARG00000083189	243.328	187.128	299.527	1.60065	0.678659	0.0499755	0.959284
zgc:136851	ENSDARG00000018757	234.789	181.219	288.358	1.59121	0.670129	0.0550468	0.959284
fscn2b	ENSDARG00000074396	261.36	202.886	319.834	1.57642	0.656651	0.0535934	0.959284
wdr18	ENSDARG00000041113	274.392	213.72	335.064	1.56777	0.648714	0.0537369	0.959284
mavs	ENSDARG00000069733	287.424	224.554	350.294	1.55996	0.641506	0.0538319	0.959284
npr1b	ENSDARG00000018750	298.948	234.403	363.494	1.55072	0.632941	0.0549142	0.959284
ggt1b	ENSDARG00000018342	312.488	245.237	379.739	1.54846	0.630836	0.05335	0.959284
fads2	ENSDARG00000019532	319.504	251.146	387.862	1.54437	0.627019	0.0536392	0.959284
si:dkeyp-35f12.3	ENSDARG00000003317	330.536	260.01	401.062	1.54249	0.625258	0.0525741	0.959284
SLC6A16 (2 of 2)	ENSDARG00000037422	352.599	277.738	427.461	1.53908	0.622068	0.0506172	0.959284
uhrf1	ENSDARG00000091448	354.599	279.708	429.491	1.5355	0.61871	0.0516014	0.959284
mep1a.2	ENSDARG00000008029	370.632	293.496	447.768	1.52563	0.60941	0.0530627	0.959284
si:dkey-71h2.2	ENSDARG00000043394	391.68	311.224	472.136	1.51703	0.60125	0.0526985	0.959284
dlgap5	ENSDARG00000045167	406.22	323.043	489.397	1.51496	0.599281	0.0518297	0.959284
dgat1b	ENSDARG00000054914	396.188	315.163	477.213	1.51418	0.598532	0.0532471	0.959284
eif4ebp3	ENSDARG00000054916	412.236	327.967	496.504	1.51389	0.598256	0.0515838	0.959284
cyp3c4	ENSDARG00000070021	405.712	323.043	488.382	1.51182	0.596284	0.053064	0.959284
gcshb	ENSDARG00000042096	456.332	365.393	547.272	1.49776	0.582809	0.0534242	0.959284
CU302316.2	ENSDARG00000029048	500.429	402.818	598.039	1.48464	0.57011	0.0550071	0.959284
tmem237a	ENSDARG00000041735	553.572	446.153	660.99	1.48153	0.56709	0.052534	0.959284
aqp12	ENSDARG00000043279	545.033	440.244	649.822	1.47605	0.56174	0.0553594	0.959284
dnajb11	ENSDARG00000015088	683.384	554.491	812.277	1.46491	0.550808	0.0526309	0.959284
pola1	ENSDARG00000045308	744.036	604.72	883.351	1.46076	0.54672	0.0520104	0.959284
uroc1	ENSDARG00000070394	891.403	726.846	1055.96	1.4528	0.538834	0.0510518	0.959284
pnp4b	ENSDARG00000029230	997.136	816.47	1177.8	1.44255	0.528624	0.053263	0.959284
ezra	ENSDARG00000020944	1418.14	1168.07	1668.21	1.42817	0.514172	0.0547945	0.959284
cadpsb	ENSDARG00000070567	1285.88	1513.77	1057.99	0.698911	-0.516819	0.0546815	0.959284
myha	ENSDARG00000095930	3263.77	3844.99	2682.54	0.697672	-0.519379	0.0538843	0.959284
nrxn2a	ENSDARG00000061454	972.189	1149.36	795.016	0.691702	-0.531777	0.052388	0.959284
pla2g15	ENSDARG00000090495	791.163	938.596	643.729	0.685843	-0.54405	0.0516238	0.959284
TUBB8P7 (1 of 3)	ENSDARG00000016301	770.714	914.959	626.469	0.684696	-0.546465	0.0512536	0.959284
ankrd1b	ENSDARG00000076192	766.221	910.034	622.407	0.683938	-0.548062	0.0507279	0.959284
BSN (2 of 3)	ENSDARG00000079822	694.918	826.319	563.517	0.681961	-0.55224	0.0515972	0.959284
snap91	ENSDARG00000076591	667.483	794.803	540.164	0.67962	-0.557199	0.0506871	0.959284
kalrna	ENSDARG00000078117	579.24	690.405	468.075	0.677971	-0.560704	0.0537109	0.959284
mthfd1a	ENSDARG00000018266	592.196	706.163	478.228	0.67722	-0.562303	0.0522919	0.959284
dhrs7c	ENSDARG00000071877	538.357	642.146	434.568	0.676744	-0.563318	0.0552025	0.959284
MYH7B (3 of 3)	ENSDARG00000094982	523.893	625.402	422.384	0.675379	-0.56623	0.0549721	0.959284
gmpr	ENSDARG00000016160	505.922	605.705	406.138	0.670522	-0.576643	0.0519512	0.959284
tnni1al	ENSDARG00000036671	472.024	565.324	378.724	0.669923	-0.577932	0.0541263	0.959284
ablim2	ENSDARG00000055223	476.502	571.234	381.77	0.668326	-0.581377	0.052339	0.959284
GALNTL6	ENSDARG00000040048escription=UDP-N-acetyl-alpha-D-galactosamine:polypeptideN-acetylgalactosaminyltransferase-like 6 [Source:HGNCSymbol;Acc:33844]	466.024	559.415	372.632	0.66611	-0.586168	0.0513027	0.959284
mllt11	ENSDARG00000071026	461.038	553.506	368.571	0.665884	-0.586657	0.0515374	0.959284
unc45b	ENSDARG00000008433	405.692	488.503	322.88	0.660958	-0.59737	0.0527231	0.959284
si:dkey-238c7.12	ENSDARG00000095556	361.316	436.304	286.328	0.656257	-0.607668	0.0550667	0.959284
alpk3a	ENSDARG00000078989	341.867	413.652	270.082	0.652921	-0.61502	0.0549151	0.959284
DOCK10 (1 of 2)	ENSDARG00000075327	335.866	407.743	263.99	0.647443	-0.627176	0.051166	0.959284
jakmip2	ENSDARG00000053547	314.925	383.121	246.729	0.643999	-0.63487	0.0515558	0.959284
aox3	ENSDARG00000071475	282.028	343.725	220.33	0.641007	-0.641589	0.0549684	0.959284
MDGA1	ENSDARG00000074376	267.564	326.982	208.146	0.636567	-0.651616	0.0542141	0.959284
kcnip1a	ENSDARG00000022109	255.593	313.194	197.993	0.632173	-0.661609	0.0532102	0.959284
ntrk3a	ENSDARG00000077228	230.666	283.647	177.686	0.626432	-0.674771	0.0545957	0.959284
syt11b	ENSDARG00000056105	220.696	271.828	169.563	0.623786	-0.680877	0.0551529	0.959284
CACNA2D2 (2 of 3)	ENSDARG00000078169	218.203	268.874	167.532	0.623088	-0.682492	0.0552915	0.959284
GRM8 (2 of 2)	ENSDARG00000077654	225.173	277.738	172.609	0.621481	-0.686217	0.0520628	0.959284
kcnc1a	ENSDARG00000051852	204.232	253.116	155.348	0.613743	-0.704293	0.0519446	0.959284
si:dkey-106l3.6	ENSDARG00000095421	184.29	229.478	139.102	0.606168	-0.722211	0.0525786	0.959284
CU459081.1	ENSDARG00000078504	167.842	209.781	125.903	0.600165	-0.73657	0.0541594	0.959284
CACNA1H (1 of 2)	ENSDARG00000060496	144.9	183.189	106.611	0.581975	-0.78097	0.0507559	0.959284
CR558302.3	ENSDARG00000055053	144.9	183.189	106.611	0.581975	-0.78097	0.0507559	0.959284
arf3a	ENSDARG00000070539	136.93	173.34	100.519	0.579897	-0.786132	0.0533431	0.959284
tmtc2	ENSDARG00000045753	129.944	165.461	94.4272	0.570692	-0.809215	0.0504853	0.959284
lactbl1b	ENSDARG00000070467	124.466	158.567	90.3658	0.569892	-0.81124	0.0531379	0.959284
GPR158 (2 of 2)	ENSDARG00000079665	117.988	150.688	85.2891	0.566	-0.821127	0.0544142	0.959284
dusp2	ENSDARG00000036572	107.017	137.884	76.151	0.552283	-0.856521	0.0521079	0.959284
ANKRD6 (2 of 2)	ENSDARG00000057790	89.0763	116.217	61.9361	0.532937	-0.907962	0.0530161	0.959284
ACTN2 (2 of 2)	ENSDARG00000090343	81.5983	107.353	55.844	0.520193	-0.942881	0.0512063	0.959284
kctd8	ENSDARG00000067507	76.1205	100.458	51.7827	0.515464	-0.956057	0.053494	0.959284
ankrd29	ENSDARG00000057159	73.6278	97.5037	49.752	0.510257	-0.970703	0.0525819	0.959284
rab11bb	ENSDARG00000023324	69.6426	92.5793	46.7059	0.504497	-0.987084	0.0530733	0.959284
prkag3a	ENSDARG00000017537	60.1796	80.7606	39.5985	0.490319	-1.02821	0.0551271	0.959284
ncs1b	ENSDARG00000054186	55.1942	74.8513	35.5371	0.474769	-1.0747	0.0517083	0.959284
BRINP3	ENSDARG00000061051	53.7017	72.8815	34.5218	0.47367	-1.07805	0.053181	0.959284
si:dkey-25o1.6	ENSDARG00000093608	53.7017	72.8815	34.5218	0.47367	-1.07805	0.053181	0.959284
INPP5A	ENSDARG00000089915	52.2091	70.9118	33.5064	0.472509	-1.08159	0.0547077	0.959284
kcnh4	ENSDARG00000061990	51.209	69.9269	32.4911	0.464644	-1.1058	0.0511138	0.959284
nlgn1	ENSDARG00000077710	44.2386	61.0629	27.4143	0.448952	-1.15537	0.052794	0.959284
CU457815.1	ENSDARG00000045633	44.2386	61.0629	27.4143	0.448952	-1.15537	0.052794	0.959284
gpr176	ENSDARG00000042515	40.2534	56.1385	24.3683	0.434075	-1.20398	0.0509965	0.959284
WIPI1 (1 of 2)	ENSDARG00000037357	38.7608	54.1687	23.353	0.431115	-1.21385	0.0521956	0.959284
BX119910.6	ENSDARG00000076777	37.2683	52.1989	22.3376	0.427932	-1.22455	0.0534026	0.959284
DOC2A	ENSDARG00000078736	33.283	47.2745	19.2916	0.408076	-1.29309	0.0502458	0.959284
HCN3 (2 of 2)	ENSDARG00000076615	31.7905	45.3047	18.2762	0.403407	-1.30969	0.0511	0.959284
LRRTM4 (1 of 4)	ENSDARG00000059535	28.8054	41.3652	16.2455	0.392734	-1.34837	0.0526182	0.959284
hoxc11b	ENSDARG00000079406	28.8054	41.3652	16.2455	0.392734	-1.34837	0.0526182	0.959284
RAB37	ENSDARG00000068083	25.8203	37.4257	14.2148	0.379816	-1.39663	0.0537341	0.959284
OLFM4 (3 of 8)	ENSDARG00000074322	25.8203	37.4257	14.2148	0.379816	-1.39663	0.0537341	0.959284
slc39a5	ENSDARG00000079525	24.3277	35.4559	13.1995	0.372279	-1.42554	0.0540752	0.959284
si:dkey-231j24.3	ENSDARG00000095819	22.8351	33.4861	12.1842	0.363857	-1.45856	0.0542287	0.959284
si:dkey-149i8.3	ENSDARG00000093306	22.8351	33.4861	12.1842	0.363857	-1.45856	0.0542287	0.959284
scn12aa	ENSDARG00000059692	21.3426	31.5163	11.1688	0.354381	-1.49663	0.0541455	0.959284
zgc:171951	ENSDARG00000087311	19.85	29.5466	10.1535	0.343643	-1.54102	0.0537635	0.959284
osgin2	ENSDARG00000040302	19.85	29.5466	10.1535	0.343643	-1.54102	0.0537635	0.959284
TRIM35 (39 of 42)	ENSDARG00000092407	16.8649	25.607	8.12277	0.317209	-1.6565	0.0517703	0.959284
si:ch211-117c19.1	ENSDARG00000059678	11.8948	18.7128	5.07673	0.271297	-1.88206	0.0551901	0.959284
DPP10	ENSDARG00000088928	11.8948	18.7128	5.07673	0.271297	-1.88206	0.0551901	0.959284
si:ch211-195d17.4	ENSDARG00000096734	10.4022	16.7431	4.06138	0.242571	-2.04352	0.0502386	0.959284
hamp2	ENSDARG00000053227	110.962	79.7757	142.148	1.78185	0.833376	0.055517	0.95959
si:ch73-112l6.5	ENSDARG00000093162	222.757	171.37	274.143	1.59972	0.677815	0.0555251	0.95959
mcfd2	ENSDARG00000039757	379.14	301.375	456.906	1.51607	0.600337	0.0555904	0.95959
si:dkey-71l10.3	ENSDARG00000095917	608.675	723.891	493.458	0.681675	-0.552845	0.0554306	0.95959
FBXO40 (1 of 2)	ENSDARG00000069775	41.2535	57.1234	25.3837	0.444365	-1.17018	0.0555972	0.95959
srl	ENSDARG00000018306	1170.2	1377.86	962.548	0.698584	-0.517494	0.0556752	0.960177
tfeb	ENSDARG00000010794	280.901	219.63	342.172	1.55795	0.639648	0.0558133	0.961636
fam3a	ENSDARG00000070675	373.124	296.451	449.798	1.51728	0.601487	0.0558921	0.961636
kal1a	ENSDARG00000012896	348.853	421.531	276.174	0.655169	-0.610061	0.0558593	0.961636
BX927318.2	ENSDARG00000088616	13.1081	5.90931	20.3069	3.43643	1.78091	0.0573952	0.962532
CABZ01074659.1	ENSDARG00000090143	13.1081	5.90931	20.3069	3.43643	1.78091	0.0573952	0.962532
tmprss3a	ENSDARG00000053315	13.1081	5.90931	20.3069	3.43643	1.78091	0.0573952	0.962532
si:ch211-57i17.5	ENSDARG00000041375	13.1081	5.90931	20.3069	3.43643	1.78091	0.0573952	0.962532
si:dkey-199m13.2	ENSDARG00000094278	14.6159	6.8942	22.3376	3.24006	1.69602	0.0584538	0.962532
si:dkey-238o14.1	ENSDARG00000092051	14.6159	6.8942	22.3376	3.24006	1.69602	0.0584538	0.962532
CAPG (2 of 2)	ENSDARG00000035560	14.6159	6.8942	22.3376	3.24006	1.69602	0.0584538	0.962532
cbln13	ENSDARG00000026904	16.1237	7.87909	24.3683	3.09278	1.62891	0.0587801	0.962532
FAM83F (2 of 2)	ENSDARG00000038012	16.1237	7.87909	24.3683	3.09278	1.62891	0.0587801	0.962532
CHRNA9 (1 of 3)	ENSDARG00000011029	16.1237	7.87909	24.3683	3.09278	1.62891	0.0587801	0.962532
fam212b	ENSDARG00000073900	17.6315	8.86397	26.399	2.97824	1.57446	0.0585783	0.962532
f9a	ENSDARG00000010097	19.1393	9.84886	28.4297	2.8866	1.52937	0.0579961	0.962532
TMPRSS3 (1 of 3)	ENSDARG00000036545	27.6783	15.7582	39.5985	2.51289	1.32935	0.0588159	0.962532
si:dkey-8k3.1	ENSDARG00000094594	46.7567	29.5466	63.9668	2.16495	1.11433	0.0563424	0.962532
zgc:113317	ENSDARG00000040781	67.3276	45.3047	89.3505	1.97221	0.979813	0.0572606	0.962532
SH3TC1 (1 of 2)	ENSDARG00000077330	82.375	57.1234	107.627	1.88411	0.913883	0.0576093	0.962532
zgc:112148	ENSDARG00000001804	89.8987	63.0327	116.765	1.85245	0.889433	0.0569564	0.962532
bco2a	ENSDARG00000055722	115.47	83.7153	147.225	1.75864	0.814462	0.0579191	0.962532
melk	ENSDARG00000030759	133.518	98.4886	168.547	1.71134	0.775127	0.0585286	0.962532
KCTD9 (2 of 2)	ENSDARG00000021209	149.566	111.292	187.839	1.6878	0.755146	0.0562431	0.962532
C12H16orf93	ENSDARG00000096777	145.55	108.337	182.762	1.68697	0.754437	0.0585444	0.962532
cnfn	ENSDARG00000041115	168.613	127.05	210.177	1.65428	0.726203	0.0571157	0.962532
nin	ENSDARG00000060298	224.249	173.34	275.159	1.58739	0.666661	0.05922	0.962532
cacybp	ENSDARG00000014731	279.393	218.645	340.141	1.55568	0.637545	0.0569304	0.962532
hao2	ENSDARG00000027992	306.457	241.297	371.617	1.54008	0.623005	0.0574338	0.962532
tead1a	ENSDARG00000028159	308.457	243.267	373.647	1.53596	0.619138	0.0586304	0.962532
zgc:92326	ENSDARG00000041060	327.505	259.025	395.985	1.52875	0.612355	0.0581182	0.962532
CABZ01034848.1	ENSDARG00000071253	377.125	300.39	453.86	1.5109	0.595409	0.0578821	0.962532
six7	ENSDARG00000070107	414.713	331.907	497.52	1.49898	0.583977	0.057119	0.962532
RBM33 (1 of 2)	ENSDARG00000068562	460.825	370.317	551.333	1.48881	0.574163	0.0566339	0.962532
rom1a	ENSDARG00000019752	529.478	428.425	630.53	1.47174	0.557521	0.0583139	0.962532
lbr	ENSDARG00000014013	620.701	504.262	737.141	1.46182	0.547769	0.0569748	0.962532
ldlr	ENSDARG00000029476	919.899	755.407	1084.39	1.4355	0.521557	0.0582116	0.962532
ugt5b3	ENSDARG00000094549	966.503	794.803	1138.2	1.43206	0.518089	0.0588142	0.962532
xdh	ENSDARG00000055240	1032.66	849.956	1215.37	1.42992	0.515934	0.0585311	0.962532
c6ast4	ENSDARG00000052578	1213.62	999.659	1427.58	1.42806	0.51406	0.0567324	0.962532
atp1b1a	ENSDARG00000013144	2341.43	1934.32	2748.54	1.42094	0.506843	0.0568568	0.962532
kidins220b	ENSDARG00000017338	2375.96	2787.23	1964.69	0.704892	-0.504525	0.0580792	0.962532
apoea	ENSDARG00000086370	1144.8	1346.34	943.257	0.700609	-0.513319	0.0580198	0.962532
camta1a	ENSDARG00000077428	1004.65	1183.83	825.476	0.697291	-0.520166	0.0570682	0.962532
MAP4 (1 of 3)	ENSDARG00000068745	903.44	1064.66	742.218	0.69714	-0.52048	0.059188	0.962532
atp2a2a	ENSDARG00000029439	903.932	1065.65	742.218	0.696496	-0.521814	0.05853	0.962532
IGFN1 (1 of 3)	ENSDARG00000005526	4578.98	5399.14	3758.81	0.696187	-0.522454	0.0586495	0.962532
mybpc1	ENSDARG00000045560	904.425	1066.63	742.218	0.695852	-0.523147	0.0578786	0.962532
ptprn2	ENSDARG00000035970	819.151	967.158	671.144	0.693934	-0.527129	0.058385	0.962532
atp2a1l	ENSDARG00000035458	5726.87	6775.03	4678.72	0.690582	-0.534115	0.0590901	0.962532
syn1	ENSDARG00000060368	583.255	693.36	473.151	0.682404	-0.551302	0.0575914	0.962532
celf4	ENSDARG00000070045	524.909	625.402	424.415	0.678627	-0.55931	0.0579212	0.962532
SLCO5A1 (2 of 2)	ENSDARG00000086104	473.04	565.324	380.755	0.673516	-0.570217	0.0573164	0.962532
gabbr1b	ENSDARG00000016667	484.503	579.113	389.893	0.673259	-0.570766	0.0560912	0.962532
chrna1	ENSDARG00000009021	441.127	527.899	354.356	0.671257	-0.575063	0.0582307	0.962532
CLCN4	ENSDARG00000035808	345.375	416.607	274.143	0.658039	-0.603755	0.0589568	0.962532
tg	ENSDARG00000020084	336.389	406.758	266.021	0.654003	-0.612632	0.056695	0.962532
mtmr7b	ENSDARG00000070412	285.028	346.68	223.376	0.64433	-0.634129	0.0572328	0.962532
CR631124.1	ENSDARG00000088837	264.086	322.058	206.115	0.639995	-0.643868	0.0579065	0.962532
shank2	ENSDARG00000062325	255.608	312.209	199.008	0.637419	-0.649686	0.057626	0.962532
asb5b	ENSDARG00000053222	233.174	285.617	180.732	0.632776	-0.660232	0.0593	0.962532
glra1	ENSDARG00000012019	241.145	295.466	186.824	0.632302	-0.661313	0.0567825	0.962532
slc8a4a	ENSDARG00000055154	233.667	286.602	180.732	0.630602	-0.665199	0.0572881	0.962532
prdm8b	ENSDARG00000054683	157.379	196.977	117.78	0.597938	-0.741932	0.0569946	0.962532
CABZ01111454.1	ENSDARG00000090225	150.901	189.098	112.703	0.596005	-0.746603	0.0585845	0.962532
ins	ENSDARG00000035350	140.93	177.279	104.581	0.58992	-0.761409	0.0589443	0.962532
cacna1f	ENSDARG00000023683	138.437	174.325	102.55	0.58827	-0.765451	0.0590189	0.962532
nsmfb	ENSDARG00000061506	135.945	171.37	100.519	0.586562	-0.769644	0.0590857	0.962532
unc5db	ENSDARG00000061541	130.959	165.461	96.4579	0.582965	-0.778518	0.0591917	0.962532
WSCD1 (2 of 3)	ENSDARG00000078006	119.989	152.657	87.3198	0.571999	-0.805916	0.0576289	0.962532
BSCL2 (1 of 2)	ENSDARG00000025912	119.989	152.657	87.3198	0.571999	-0.805916	0.0576289	0.962532
nr4a2a	ENSDARG00000017007	116.003	147.733	84.2737	0.570447	-0.809836	0.059196	0.962532
MAPK8IP1 (1 of 2)	ENSDARG00000090326	118.988	151.672	86.3044	0.569019	-0.813452	0.0560138	0.962532
cygb2	ENSDARG00000070148	92.0767	119.171	64.9822	0.545284	-0.87492	0.0592961	0.962532
DNAJC14	ENSDARG00000091478	69.1502	91.5944	46.7059	0.509921	-0.971654	0.0574377	0.962532
ryr2a	ENSDARG00000079171	58.687	78.7909	38.5832	0.489691	-1.03006	0.0567683	0.962532
tmeff1a	ENSDARG00000008191	57.1944	76.8211	37.5678	0.48903	-1.03201	0.0584764	0.962532
C18H3orf33	ENSDARG00000040582	31.298	44.3199	18.2762	0.412371	-1.27798	0.0581652	0.962532
BX855614.1	ENSDARG00000079085	13.3873	20.6826	6.09208	0.294551	-1.76341	0.0586853	0.962532
mir451a	ENSDARG00000095304	13.3873	20.6826	6.09208	0.294551	-1.76341	0.0586853	0.962532
si:rp71-39b20.6	ENSDARG00000093243	116.47	84.7002	148.241	1.75018	0.807503	0.0593599	0.962787
SLC22A7 (5 of 5)	ENSDARG00000091252	65.8198	44.3199	87.3198	1.97022	0.978355	0.0595303	0.963523
dek	ENSDARG00000070108	403.174	323.043	483.305	1.4961	0.581209	0.059646	0.963523
pls1	ENSDARG00000039272	769.531	630.327	908.735	1.44169	0.527759	0.0597094	0.963523
diras1a	ENSDARG00000028066	455.098	543.657	366.54	0.674212	-0.568726	0.05964	0.963523
ca10a	ENSDARG00000052644	429.664	514.11	345.218	0.671486	-0.574572	0.0596442	0.963523
ENSDARG00000077905	ENSDARG00000077905	252.623	308.269	196.977	0.638978	-0.646163	0.0597147	0.963523
CABZ01065679.1	ENSDARG00000062839	47.7314	65.0025	30.4604	0.468604	-1.09356	0.0596342	0.963523
guca1c	ENSDARG00000030758	277.377	217.66	337.095	1.54872	0.63108	0.0599138	0.965325
gpr173	ENSDARG00000042922	97.062	125.08	69.0435	0.551993	-0.857278	0.0599149	0.965325
LIMA1 (2 of 2)	ENSDARG00000076009	554.526	450.093	658.96	1.46405	0.549968	0.0599915	0.965845
zgc:174356	ENSDARG00000088263	73.3435	50.2292	96.4579	1.92036	0.941374	0.0600646	0.966309
CR352328.3	ENSDARG00000088656	31.694	18.7128	44.6752	2.38741	1.25545	0.0608831	0.966443
DMBX1 (3 of 3)	ENSDARG00000021959	31.694	18.7128	44.6752	2.38741	1.25545	0.0608831	0.966443
SGOL1	ENSDARG00000069916	94.4069	66.9722	121.842	1.81928	0.863371	0.0602419	0.966443
si:ch211-117m20.4	ENSDARG00000094286	108.947	78.7909	139.102	1.76546	0.820047	0.0610739	0.966443
si:ch211-203k16.3	ENSDARG00000069305	235.774	183.189	288.358	1.5741	0.654532	0.0606605	0.966443
slc31a1	ENSDARG00000013961	660.767	539.717	781.817	1.44857	0.534626	0.0610322	0.966443
opn1sw1	ENSDARG00000045677	5268.83	4320.69	6216.96	1.43888	0.524947	0.0610633	0.966443
PPFIA3	ENSDARG00000077053	707.458	836.168	578.747	0.692142	-0.530859	0.060736	0.966443
TNS1 (2 of 2)	ENSDARG00000078842	644.618	763.286	525.949	0.689059	-0.537301	0.0606331	0.966443
gnb2	ENSDARG00000035357	559.836	664.798	454.875	0.684231	-0.547445	0.0608776	0.966443
CR352286.1	ENSDARG00000077920	539.387	641.161	437.614	0.682534	-0.551026	0.0606384	0.966443
2015-09-03	ENSDARG00000030656	430.664	515.095	346.233	0.672173	-0.573096	0.0601922	0.966443
ENSDARG00000045979	ENSDARG00000045979	337.405	406.758	268.051	0.658995	-0.601661	0.0610926	0.966443
lims2	ENSDARG00000014976	311.97	377.211	246.729	0.654087	-0.612445	0.0608725	0.966443
cdk5r2a	ENSDARG00000071011	290.029	351.604	228.453	0.649744	-0.622056	0.0610831	0.966443
kif5c	ENSDARG00000076027	273.072	331.907	214.238	0.645477	-0.631562	0.0607819	0.966443
fhl1a	ENSDARG00000071498	213.233	261.98	164.486	0.627858	-0.671489	0.0608543	0.966443
mapk11	ENSDARG00000045836	170.35	211.75	128.949	0.608967	-0.715565	0.0602631	0.966443
CCDC88A (2 of 2)	ENSDARG00000078440	102.047	130.99	73.1049	0.558096	-0.841414	0.0603559	0.966443
PDE2A (1 of 2)	ENSDARG00000079064	66.165	87.6548	44.6752	0.509672	-0.972358	0.0609869	0.966443
si:ch211-205a14.12	ENSDARG00000095875	14.8799	22.6524	7.10742	0.313761	-1.67226	0.0610621	0.966443
CT737190.3	ENSDARG00000091514	14.8799	22.6524	7.10742	0.313761	-1.67226	0.0610621	0.966443
FSTL5	ENSDARG00000086731	14.8799	22.6524	7.10742	0.313761	-1.67226	0.0610621	0.966443
tmem179b	ENSDARG00000069495	50.2647	32.5012	68.0282	2.0931	1.06564	0.0612102	0.9676
clcn1b	ENSDARG00000012269	81.6135	106.368	56.8594	0.534555	-0.903589	0.0615655	0.971104
tmed1a	ENSDARG00000031325	62.1798	82.7304	41.6292	0.503191	-0.990822	0.0615578	0.971104
dnajb5	ENSDARG00000052881	35.2833	49.2443	21.3223	0.43299	-1.2076	0.0615458	0.971104
si:ch211-235f12.5	ENSDARG00000068303	35.7097	21.6675	49.752	2.29616	1.19922	0.0616921	0.971416
chst1	ENSDARG00000088593	95.5695	123.111	68.0282	0.552577	-0.855752	0.0617189	0.971416
ATP8B4	ENSDARG00000079453	95.5695	123.111	68.0282	0.552577	-0.855752	0.0617189	0.971416
si:dkey-22o12.7	ENSDARG00000096632	381.618	305.315	457.921	1.49983	0.584803	0.0618725	0.97313
dre-mir-459	ENSDARG00000080051	55.2805	36.4408	74.1203	2.03399	1.02431	0.062963	0.973305
CABZ01015787.1	ENSDARG00000068944	71.8357	49.2443	94.4272	1.91753	0.939246	0.0624471	0.973305
rbmx2	ENSDARG00000044380	87.8833	62.0478	113.719	1.83276	0.874018	0.0633674	0.973305
pycrl	ENSDARG00000015236	179.63	136.899	222.361	1.62427	0.699789	0.0619768	0.973305
CELA1 (2 of 7)	ENSDARG00000043168	203.186	156.597	249.775	1.59502	0.673575	0.0632064	0.973305
si:ch211-288g17.4	ENSDARG00000070960	235.266	183.189	287.343	1.56856	0.649443	0.0628275	0.973305
tmco1	ENSDARG00000069099	346.03	275.768	416.292	1.50957	0.59414	0.062885	0.973305
impdh1a	ENSDARG00000042336	516.923	419.561	614.284	1.46411	0.550025	0.0627467	0.973305
hsd17b12b	ENSDARG00000035872	627.179	512.141	742.218	1.44925	0.535303	0.0624758	0.973305
rbm25	ENSDARG00000006395	966.965	797.757	1136.17	1.42421	0.51016	0.0627688	0.973305
slc29a1a	ENSDARG00000031651	1070.7	885.412	1255.98	1.41853	0.504396	0.0636696	0.973305
CABZ01084323.1	ENSDARG00000059452	1639.56	1918.56	1360.56	0.70916	-0.495817	0.0627886	0.973305
stxbp1a	ENSDARG00000001994	1805.11	2112.58	1497.64	0.708913	-0.496319	0.0620584	0.973305
ENSDARG00000035437	ENSDARG00000035437	2734.57	3201.86	2267.27	0.708109	-0.497957	0.062395	0.973305
rbfox3	ENSDARG00000010083	562.344	666.768	457.921	0.686778	-0.542085	0.0632677	0.973305
slc32a1	ENSDARG00000059775	539.895	641.161	438.63	0.684118	-0.547683	0.0621759	0.973305
ntd5	ENSDARG00000040944	468.085	557.445	378.724	0.679392	-0.557683	0.0634644	0.973305
chrne	ENSDARG00000034307	396.767	474.715	318.819	0.6716	-0.574325	0.0636238	0.973305
rlbp1b	ENSDARG00000045808	390.781	467.821	313.742	0.670646	-0.576377	0.0634589	0.973305
im:6903943	ENSDARG00000060439	335.42	403.803	267.036	0.661302	-0.596618	0.0636157	0.973305
MYL4 (1 of 2)	ENSDARG00000011519	341.898	411.682	272.113	0.660978	-0.597327	0.0622465	0.973305
c1qtnf4	ENSDARG00000024299	322.449	389.03	255.867	0.657706	-0.604486	0.0623927	0.973305
cdk5r1b	ENSDARG00000045087	298.014	360.468	235.56	0.653484	-0.613775	0.0629633	0.973305
CABZ01076351.1	ENSDARG00000075865	295.522	357.514	233.53	0.653205	-0.614392	0.0631989	0.973305
UNC80 (2 of 2)	ENSDARG00000079480	220.218	269.859	170.578	0.632102	-0.661771	0.0624601	0.973305
fgf13b	ENSDARG00000056633	211.74	260.01	163.471	0.62871	-0.669534	0.0620852	0.973305
cnga5	ENSDARG00000060287	183.321	226.524	140.118	0.618557	-0.693022	0.0632178	0.973305
slc22a7a	ENSDARG00000056028	180.828	223.569	138.087	0.617648	-0.695142	0.0634107	0.973305
gria1b	ENSDARG00000032714	178.335	220.614	136.056	0.616716	-0.697322	0.0636033	0.973305
TACO1 (1 of 2)	ENSDARG00000062943	159.887	198.947	120.826	0.607329	-0.71945	0.0636566	0.973305
fstl3	ENSDARG00000025670	148.916	186.143	111.688	0.600011	-0.736939	0.062965	0.973305
ENSDARG00000016531	ENSDARG00000016531	115.511	146.748	84.2737	0.574275	-0.800186	0.0626345	0.973305
UBASH3B (1 of 2)	ENSDARG00000061243	103.047	131.975	74.1203	0.561625	-0.832321	0.0623079	0.973305
kctd1	ENSDARG00000074056	98.0621	126.065	70.0589	0.555735	-0.847532	0.0619563	0.973305
si:ch211-284e13.4	ENSDARG00000060330	94.0769	121.141	67.0128	0.553181	-0.854177	0.0635942	0.973305
CPNE8 (1 of 2)	ENSDARG00000025189	94.0769	121.141	67.0128	0.553181	-0.854177	0.0635942	0.973305
TRPC7 (2 of 4)	ENSDARG00000037660	22.3427	32.5012	12.1842	0.374883	-1.41549	0.063461	0.973305
CABZ01048093.1	ENSDARG00000087041	22.3427	32.5012	12.1842	0.374883	-1.41549	0.063461	0.973305
BX548160.2	ENSDARG00000080021	17.865	26.5919	9.13812	0.343643	-1.54102	0.0634478	0.973305
si:dkey-4c15.15	ENSDARG00000071819	16.3725	24.6221	8.12277	0.329897	-1.59991	0.0625828	0.973305
armc4	ENSDARG00000055128	96.4071	68.942	123.872	1.79676	0.845398	0.0638572	0.975362
RASSF7 (3 of 3)	ENSDARG00000094325	147.042	110.307	183.778	1.66605	0.736434	0.0639678	0.975362
epha6	ENSDARG00000022971	296.522	358.498	234.545	0.654243	-0.612102	0.0639831	0.975362
KIFC2	ENSDARG00000053431	131.467	165.461	97.4732	0.589102	-0.763412	0.0639384	0.975362
atoh7	ENSDARG00000069552	34.2019	20.6826	47.7213	2.30731	1.20621	0.0641544	0.976204
IQUB	ENSDARG00000061899	34.2019	20.6826	47.7213	2.30731	1.20621	0.0641544	0.976204
AL954146.5	ENSDARG00000091294	38.2176	23.6373	52.798	2.23368	1.15942	0.0641915	0.976204
DGKI	ENSDARG00000063578	443.65	528.884	358.417	0.677686	-0.561311	0.0642175	0.976204
nlgn4a	ENSDARG00000079455	412.231	492.443	332.018	0.674227	-0.568694	0.0643095	0.976923
mc1r	ENSDARG00000020237	23.155	12.8035	33.5064	2.61697	1.3879	0.0643732	0.977208
adcyap1b	ENSDARG00000027740	608.736	719.952	497.52	0.691046	-0.533146	0.0646791	0.980486
mxc	ENSDARG00000024789	9.90978	15.7582	4.06138	0.257732	-1.95606	0.0646678	0.980486
tnni2b.2	ENSDARG00000029995	1022.69	1199.59	845.783	0.70506	-0.504182	0.0647352	0.980655
cbln5	ENSDARG00000053802	108.439	78.7909	138.087	1.75258	0.809478	0.0648817	0.981225
GPR89A	ENSDARG00000077983	108.439	78.7909	138.087	1.75258	0.809478	0.0648817	0.981225
nlgn3a	ENSDARG00000062581	502.505	596.841	408.169	0.683883	-0.548179	0.0649078	0.981225
mdh1b	ENSDARG00000092649	603.75	714.042	493.458	0.691077	-0.533081	0.0650155	0.981706
pcbp3	ENSDARG00000054378	337.42	405.773	269.067	0.663097	-0.592709	0.0650298	0.981706
si:ch211-202h22.8	ENSDARG00000078138	44.7412	28.5617	60.9208	2.13295	1.09285	0.0651767	0.981884
rab11fip1b	ENSDARG00000036462	254.806	199.932	309.681	1.54893	0.631273	0.0651232	0.981884
atcaya	ENSDARG00000071678	190.306	234.403	146.21	0.623755	-0.680949	0.0651603	0.981884
arf1	ENSDARG00000009484	939.378	776.09	1102.67	1.4208	0.5067	0.0652264	0.981955
map9	ENSDARG00000037276	88.8834	63.0327	114.734	1.82023	0.864122	0.0653661	0.9827
sult1st3	ENSDARG00000018361	186.138	142.808	229.468	1.60683	0.684213	0.0653318	0.9827
si:dkey-19a16.2	ENSDARG00000058794	28.6785	16.7431	40.6138	2.42571	1.27841	0.0654788	0.983039
FNDC7 (3 of 7)	ENSDARG00000087524	78.6284	102.428	54.8287	0.535289	-0.901609	0.0654754	0.983039
SNORD22	ENSDARG00000083784	53.7727	35.4559	72.0896	2.03322	1.02377	0.0656054	0.983327
slc7a14a	ENSDARG00000010816	449.143	534.793	363.494	0.679691	-0.557049	0.0656738	0.983327
ADAMTS15 (2 of 2)	ENSDARG00000033544	209.755	257.055	162.455	0.631986	-0.662035	0.0657235	0.983327
add3b	ENSDARG00000056250	209.755	257.055	162.455	0.631986	-0.662035	0.0657235	0.983327
cacng7b	ENSDARG00000070624	37.776	52.1989	23.353	0.447384	-1.16042	0.0655701	0.983327
camk2b2	ENSDARG00000021065	95.077	122.126	68.0282	0.557034	-0.844164	0.0657738	0.983404
kif16bb	ENSDARG00000080018	196.662	151.672	241.652	1.59325	0.671975	0.0661706	0.983849
si:dkey-104e13.1	ENSDARG00000093590	222.726	173.34	272.113	1.56982	0.650601	0.0660596	0.983849
arpp19b	ENSDARG00000039880	282.87	223.569	342.172	1.5305	0.614	0.0659191	0.983849
irf2bpl	ENSDARG00000004297	502.013	595.856	408.169	0.685013	-0.545796	0.0661214	0.983849
si:dkey-29b22.4	ENSDARG00000093118	375.825	450.093	301.558	0.66999	-0.577788	0.0659633	0.983849
TRHDE (2 of 2)	ENSDARG00000076044	259.624	315.163	204.085	0.647552	-0.626933	0.0658931	0.983849
dmbx1a	ENSDARG00000009922	145.931	182.204	109.657	0.601839	-0.732551	0.0662097	0.983849
GPR137B (2 of 3)	ENSDARG00000077608	65.6726	86.6699	44.6752	0.515464	-0.956057	0.0660768	0.983849
vwc2	ENSDARG00000076495	30.8056	43.335	18.2762	0.421743	-1.24556	0.0661557	0.983849
ssbp1	ENSDARG00000039350	149.043	112.277	185.808	1.65491	0.726753	0.0664065	0.9861
CABZ01064674.1	ENSDARG00000088540	32.6941	19.6977	45.6906	2.31959	1.21387	0.0667331	0.98831
FP102052.1	ENSDARG00000069333	92.3914	65.9873	118.796	1.80028	0.848219	0.0668269	0.98831
BX511271.1	ENSDARG00000043395	223.726	174.325	273.128	1.56678	0.6478	0.066918	0.98831
nupr1	ENSDARG00000094557	349.523	279.708	419.338	1.4992	0.584194	0.0668423	0.98831
CABZ01008011.1	ENSDARG00000033993	349.523	279.708	419.338	1.4992	0.584194	0.0668423	0.98831
sdr16c5b	ENSDARG00000017794	1226.53	1018.37	1434.68	1.4088	0.494469	0.0666377	0.98831
obscn	ENSDARG00000043309	74.6432	97.5037	51.7827	0.531084	-0.912988	0.0668573	0.98831
flrt1a	ENSDARG00000077556	61.6874	81.7455	41.6292	0.509254	-0.973544	0.0669053	0.98831
zgc:114174	ENSDARG00000057884	4808.67	5647.34	3970	0.702987	-0.50843	0.0670022	0.988884
si:ch211-277e21.1	ENSDARG00000096800	27.1707	15.7582	38.5832	2.44845	1.29187	0.0678795	0.989692
si:ch1073-126c3.2	ENSDARG00000092858	27.1707	15.7582	38.5832	2.44845	1.29187	0.0678795	0.989692
si:dkeyp-51f11.3	ENSDARG00000094414	43.2334	27.5768	58.8901	2.13549	1.09457	0.0679709	0.989692
E2F2	ENSDARG00000079233	104.423	75.8362	133.01	1.75392	0.81058	0.0679288	0.989692
pdzd3a	ENSDARG00000040568	106.931	77.806	136.056	1.74866	0.806252	0.0672196	0.989692
TONSL	ENSDARG00000071294	124.979	92.5793	157.379	1.69993	0.765479	0.0673625	0.989692
lrwd1	ENSDARG00000035147	130.995	97.5037	164.486	1.68697	0.754437	0.067204	0.989692
fuom	ENSDARG00000039422	153.551	116.217	190.885	1.6425	0.715889	0.0680528	0.989692
si:ch211-194e15.5	ENSDARG00000061804	188.139	144.778	231.499	1.59899	0.677161	0.0673459	0.989692
errfi1	ENSDARG00000070171	419.176	338.801	499.55	1.47447	0.560193	0.0674399	0.989692
idi1	ENSDARG00000019976	728.374	599.795	856.952	1.42874	0.514744	0.067958	0.989692
aldh1l1	ENSDARG00000077004	2530.65	2107.66	2953.64	1.40139	0.486856	0.0677695	0.989692
tuba2	ENSDARG00000045014	1483.05	1731.43	1234.66	0.713088	-0.487848	0.0679375	0.989692
ncam2	ENSDARG00000017466	854.14	1002.61	705.666	0.703826	-0.506709	0.0676509	0.989692
hbbe1.1	ENSDARG00000089963	772.343	908.065	636.622	0.701076	-0.512358	0.0674747	0.989692
cadm1a	ENSDARG00000031075	722.967	850.941	594.993	0.699217	-0.516187	0.0674878	0.989692
si:dkey-251i10.2	ENSDARG00000093957	375.333	449.108	301.558	0.67146	-0.574628	0.0675243	0.989692
lgi1a	ENSDARG00000020493	255.639	310.239	201.039	0.648012	-0.625908	0.0673541	0.989692
RNF208	ENSDARG00000078056	173.858	214.705	133.01	0.619503	-0.690818	0.0680558	0.989692
LRFN4 (1 of 2)	ENSDARG00000055132	149.423	186.143	112.703	0.605466	-0.723883	0.0674738	0.989692
gcgb	ENSDARG00000040907	53.7169	71.8967	35.5371	0.49428	-1.0166	0.068009	0.989692
CR391967.1	ENSDARG00000091377	53.7169	71.8967	35.5371	0.49428	-1.0166	0.068009	0.989692
zgc:173593	ENSDARG00000077360	110.439	80.7606	140.118	1.73498	0.794916	0.0681489	0.99038
pik3ip1	ENSDARG00000003281	299.03	360.468	237.591	0.659118	-0.601392	0.0682394	0.99038
dennd6b	ENSDARG00000011605	157.902	195.992	119.811	0.611304	-0.710038	0.0682066	0.99038
fam49a	ENSDARG00000035907	868.111	1018.37	717.85	0.704899	-0.504511	0.0684131	0.991729
PCDH9	ENSDARG00000063264	237.19	288.572	185.808	0.64389	-0.635114	0.0684234	0.991729
CR936975.4	ENSDARG00000094836	245.668	298.42	192.916	0.646456	-0.629375	0.0685146	0.992391
si:dkey-202b22.6	ENSDARG00000045552	11.0927	4.92443	17.2609	3.50515	1.80948	0.0705889	0.995966
CABZ01086401.1	ENSDARG00000086743	11.0927	4.92443	17.2609	3.50515	1.80948	0.0705889	0.995966
avp	ENSDARG00000058567	18.6316	9.84886	27.4143	2.78351	1.4769	0.0694236	0.995966
guca1b	ENSDARG00000013393	35.2021	21.6675	48.7366	2.2493	1.16947	0.0696893	0.995966
CABZ01071407.1	ENSDARG00000013134	59.7887	40.3803	79.197	1.96128	0.971794	0.0699245	0.995966
KIF9	ENSDARG00000031693	67.3124	46.2896	88.3351	1.90831	0.932298	0.070332	0.995966
cyp2aa2	ENSDARG00000087868	85.8678	61.0629	110.673	1.81244	0.857931	0.0705496	0.995966
si:dkey-246i14.3	ENSDARG00000090427	99.4075	71.8967	126.918	1.76529	0.819903	0.069343	0.995966
GSG2	ENSDARG00000092290	119.963	88.6397	151.287	1.70676	0.771259	0.0689568	0.995966
si:dkey-103j14.5	ENSDARG00000002219	123.471	91.5944	155.348	1.69604	0.762172	0.0696404	0.995966
mnd1	ENSDARG00000074451	142.519	107.353	177.686	1.65516	0.72697	0.0701141	0.995966
slc5a9	ENSDARG00000005518	165.075	126.065	204.085	1.61888	0.694995	0.0703274	0.995966
ppp1r18	ENSDARG00000071251	230.235	180.234	280.236	1.55484	0.636768	0.0696358	0.995966
cgna	ENSDARG00000055607	277.347	219.63	335.064	1.52559	0.609366	0.0692497	0.995966
ncapd3	ENSDARG00000034773	367.555	295.466	439.645	1.48797	0.573348	0.0691834	0.995966
slc27a1b	ENSDARG00000038352	373.064	300.39	445.737	1.48386	0.569355	0.070307	0.995966
ptpn2b	ENSDARG00000035986	387.096	312.209	461.983	1.47972	0.565327	0.0702732	0.995966
si:dkey-162h11.2	ENSDARG00000091715	467.272	380.166	554.379	1.45826	0.544243	0.0700901	0.995966
sec11a	ENSDARG00000008936	483.812	393.954	573.671	1.45619	0.542194	0.0695129	0.995966
hnf4a	ENSDARG00000021494	520.893	425.471	616.315	1.44855	0.534609	0.0701241	0.995966
cald1l	ENSDARG00000070314	606.086	497.367	714.804	1.43717	0.523235	0.0698975	0.995966
kif5aa	ENSDARG00000005470	1898.5	2212.05	1584.96	0.716509	-0.480944	0.0704195	0.995966
SEC16A	ENSDARG00000063300	1960.84	2284.94	1636.74	0.716317	-0.48133	0.070147	0.995966
pabpc1b	ENSDARG00000021140	1288.56	1504.91	1072.21	0.712474	-0.489091	0.0689316	0.995966
TMC6 (1 of 2)	ENSDARG00000004875	306.015	368.347	243.683	0.661558	-0.596061	0.069271	0.995966
CABZ01073112.1	ENSDARG00000091350	266.117	322.058	210.177	0.652606	-0.615717	0.0692119	0.995966
chrnd	ENSDARG00000019342	257.639	312.209	203.069	0.650428	-0.620539	0.069206	0.995966
gfra4	ENSDARG00000056651	213.756	260.995	166.517	0.638008	-0.648353	0.0700945	0.995966
atxn7l3	ENSDARG00000029331	211.263	258.04	164.486	0.637444	-0.64963	0.0704042	0.995966
map3k12	ENSDARG00000042565	172.365	212.735	131.995	0.620466	-0.688576	0.0696325	0.995966
xkr6	ENSDARG00000043410	114.526	144.778	84.2737	0.582089	-0.78069	0.0700621	0.995966
cnih3	ENSDARG00000014953	109.541	138.869	80.2123	0.577612	-0.791827	0.0702357	0.995966
CSRNP3	ENSDARG00000079741	89.5992	115.232	63.9668	0.555115	-0.849141	0.0696821	0.995966
jagn1a	ENSDARG00000041071	84.6139	109.322	59.9054	0.547971	-0.867829	0.0690576	0.995966
LINGO3 (2 of 2)	ENSDARG00000067815	44.2539	60.078	28.4297	0.473213	-1.07944	0.0700295	0.995966
CR847851.8	ENSDARG00000089297	27.8205	39.3954	16.2455	0.412371	-1.27798	0.0691493	0.995966
OLFM4 (6 of 8)	ENSDARG00000087569	26.3279	37.4257	15.2302	0.406945	-1.29709	0.0705669	0.995966
BX005093.1	ENSDARG00000062565	11.4023	17.7279	5.07673	0.286369	-1.80405	0.0695727	0.995966
IAPP	ENSDARG00000074122	11.4023	17.7279	5.07673	0.286369	-1.80405	0.0695727	0.995966
si:dkey-81h8.1	ENSDARG00000094074	11.4023	17.7279	5.07673	0.286369	-1.80405	0.0695727	0.995966
RNASEH2C (1 of 2)	ENSDARG00000089637	94.3917	67.9571	120.826	1.77798	0.830237	0.0707346	0.997377
far1	ENSDARG00000006899	303.903	242.282	365.525	1.50867	0.593282	0.0708887	0.998903
tmem182	ENSDARG00000040374	423.232	503.277	343.187	0.681905	-0.552357	0.0709502	0.999124
CALHM1 (1 of 2)	ENSDARG00000005314	10.585	4.92443	16.2455	3.29897	1.72202	0.0901095	1
si:ch211-170d8.2	ENSDARG00000094887	10.585	4.92443	16.2455	3.29897	1.72202	0.0901095	1
tcte1	ENSDARG00000077387	10.585	4.92443	16.2455	3.29897	1.72202	0.0901095	1
ehf	ENSDARG00000052115	10.585	4.92443	16.2455	3.29897	1.72202	0.0901095	1
BX649296.1	ENSDARG00000089729	12.6004	5.90931	19.2916	3.2646	1.70691	0.0719468	1
si:dkey-238o14.6	ENSDARG00000092586	12.0928	5.90931	18.2762	3.09278	1.62891	0.0901758	1
CCDC37 (2 of 2)	ENSDARG00000090342	12.0928	5.90931	18.2762	3.09278	1.62891	0.0901758	1
CABZ01112215.1	ENSDARG00000079534	10.0773	4.92443	15.2302	3.09278	1.62891	0.115056	1
ENSDARG00000032477	ENSDARG00000032477	12.0928	5.90931	18.2762	3.09278	1.62891	0.0901758	1
olfcj1	ENSDARG00000079954	10.0773	4.92443	15.2302	3.09278	1.62891	0.115056	1
si:dkey-28f6.2	ENSDARG00000095642	10.0773	4.92443	15.2302	3.09278	1.62891	0.115056	1
C18H15orf26	ENSDARG00000018281	14.1082	6.8942	21.3223	3.09278	1.62891	0.0722129	1
si:dkey-156m18.1	ENSDARG00000094475	10.0773	4.92443	15.2302	3.09278	1.62891	0.115056	1
si:ch211-213a13.2	ENSDARG00000093024	12.0928	5.90931	18.2762	3.09278	1.62891	0.0901758	1
CABZ01044356.1	ENSDARG00000087080	12.0928	5.90931	18.2762	3.09278	1.62891	0.0901758	1
rca2.2	ENSDARG00000095512	12.0928	5.90931	18.2762	3.09278	1.62891	0.0901758	1
si:dkey-222h21.6	ENSDARG00000092294	15.616	7.87909	23.353	2.96392	1.56751	0.0717353	1
si:dkey-104k17.1	ENSDARG00000094771	15.616	7.87909	23.353	2.96392	1.56751	0.0717353	1
si:dkey-11o1.2	ENSDARG00000095772	13.6006	6.8942	20.3069	2.94551	1.55852	0.0891702	1
stk33	ENSDARG00000054318	15.1084	7.87909	22.3376	2.83505	1.50337	0.0874893	1
TNFRSF14 (10 of 12)	ENSDARG00000094219	15.1084	7.87909	22.3376	2.83505	1.50337	0.0874893	1
si:dkey-27h10.2	ENSDARG00000094485	11.0774	5.90931	16.2455	2.74914	1.45898	0.141503	1
si:dkeyp-85d8.2	ENSDARG00000096227	16.6161	8.86397	24.3683	2.74914	1.45898	0.0853881	1
CR854948.2	ENSDARG00000086711	11.0774	5.90931	16.2455	2.74914	1.45898	0.141503	1
slc2a9l1	ENSDARG00000070672	11.0774	5.90931	16.2455	2.74914	1.45898	0.141503	1
si:dkey-236e20.3	ENSDARG00000071495	11.0774	5.90931	16.2455	2.74914	1.45898	0.141503	1
KCNA10 (1 of 2)	ENSDARG00000059935	14.6007	7.87909	21.3223	2.70619	1.43626	0.106619	1
CU694254.1	ENSDARG00000087038	14.6007	7.87909	21.3223	2.70619	1.43626	0.106619	1
NUGGC (2 of 4)	ENSDARG00000071001	14.6007	7.87909	21.3223	2.70619	1.43626	0.106619	1
LAMB3 (1 of 2)	ENSDARG00000059369	14.6007	7.87909	21.3223	2.70619	1.43626	0.106619	1
CU681855.1	ENSDARG00000091299	18.1239	9.84886	26.399	2.68041	1.42245	0.0830341	1
mir96	ENSDARG00000083126	16.1085	8.86397	23.353	2.63459	1.39758	0.102962	1
dyx1c1	ENSDARG00000007792	16.1085	8.86397	23.353	2.63459	1.39758	0.102962	1
bokb	ENSDARG00000008807	19.6317	10.8337	28.4297	2.62418	1.39187	0.0805391	1
si:ch211-114c12.5	ENSDARG00000092931	19.6317	10.8337	28.4297	2.62418	1.39187	0.0805391	1
FP340264.1	ENSDARG00000089772	21.1395	11.8186	30.4604	2.57732	1.36587	0.0779784	1
mir183	ENSDARG00000080467	10.5698	5.90931	15.2302	2.57732	1.36587	0.177073	1
BX323023.2	ENSDARG00000095088	14.093	7.87909	20.3069	2.57732	1.36587	0.129807	1
si:dkey-262g12.4	ENSDARG00000095670	17.6163	9.84886	25.3837	2.57732	1.36587	0.0992194	1
tubb1	ENSDARG00000053066	14.093	7.87909	20.3069	2.57732	1.36587	0.129807	1
si:ch211-93g21.2	ENSDARG00000092842	21.1395	11.8186	30.4604	2.57732	1.36587	0.0779784	1
si:dkeyp-87d8.9	ENSDARG00000096300	10.5698	5.90931	15.2302	2.57732	1.36587	0.177073	1
CR376848.1	ENSDARG00000057230	10.5698	5.90931	15.2302	2.57732	1.36587	0.177073	1
CABZ01072511.1	ENSDARG00000090053	17.6163	9.84886	25.3837	2.57732	1.36587	0.0992194	1
HIST1H4F	ENSDARG00000090149	14.093	7.87909	20.3069	2.57732	1.36587	0.129807	1
pih1d3	ENSDARG00000038612	19.124	10.8337	27.4143	2.53046	1.3394	0.0954838	1
HTRA2 (6 of 31)	ENSDARG00000076713	15.6008	8.86397	22.3376	2.52005	1.33345	0.124023	1
NEK11	ENSDARG00000087564	15.6008	8.86397	22.3376	2.52005	1.33345	0.124023	1
XAF1	ENSDARG00000068939	12.0775	6.8942	17.2609	2.50368	1.32405	0.167145	1
CUZD1 (5 of 5)	ENSDARG00000090009	12.0775	6.8942	17.2609	2.50368	1.32405	0.167145	1
psmb10	ENSDARG00000001656	12.0775	6.8942	17.2609	2.50368	1.32405	0.167145	1
zgc:194242	ENSDARG00000079532	12.0775	6.8942	17.2609	2.50368	1.32405	0.167145	1
dmrt1	ENSDARG00000007349	17.1086	9.84886	24.3683	2.47423	1.30698	0.118432	1
dytn	ENSDARG00000071025	17.1086	9.84886	24.3683	2.47423	1.30698	0.118432	1
PLEKHA2	ENSDARG00000078221	22.1396	12.8035	31.4757	2.45837	1.2977	0.0882381	1
fabp10b	ENSDARG00000091101	13.5853	7.87909	19.2916	2.44845	1.29187	0.157855	1
si:ch211-281g2.3	ENSDARG00000092291	13.5853	7.87909	19.2916	2.44845	1.29187	0.157855	1
si:dkey-96h14.3	ENSDARG00000094142	18.6164	10.8337	26.399	2.43674	1.28495	0.113079	1
si:ch211-170p16.1	ENSDARG00000091590	10.0621	5.90931	14.2148	2.4055	1.26634	0.221339	1
CABZ01069022.1	ENSDARG00000086417	10.0621	5.90931	14.2148	2.4055	1.26634	0.221339	1
AL929108.1	ENSDARG00000088156	10.0621	5.90931	14.2148	2.4055	1.26634	0.221339	1
SCARNA8	ENSDARG00000084112	15.0931	8.86397	21.3223	2.4055	1.26634	0.149213	1
SH2D6	ENSDARG00000090607	10.0621	5.90931	14.2148	2.4055	1.26634	0.221339	1
NRTN	ENSDARG00000079849	15.0931	8.86397	21.3223	2.4055	1.26634	0.149213	1
atoh1b	ENSDARG00000033400	15.0931	8.86397	21.3223	2.4055	1.26634	0.149213	1
pgpep1l	ENSDARG00000041092	10.0621	5.90931	14.2148	2.4055	1.26634	0.221339	1
ENSDARG00000086607	ENSDARG00000086607	25.1552	14.7733	35.5371	2.4055	1.26634	0.0814583	1
he1a	ENSDARG00000023656	10.0621	5.90931	14.2148	2.4055	1.26634	0.221339	1
mchr2	ENSDARG00000036117	10.0621	5.90931	14.2148	2.4055	1.26634	0.221339	1
CU855880.2	ENSDARG00000089183	10.0621	5.90931	14.2148	2.4055	1.26634	0.221339	1
si:dkey-32m20.1	ENSDARG00000075715	26.663	15.7582	37.5678	2.38402	1.2534	0.0782669	1
BX571707.1	ENSDARG00000039065	21.632	12.8035	30.4604	2.37906	1.25039	0.103149	1
CU459094.1	ENSDARG00000051954	16.6009	9.84886	23.353	2.37113	1.24558	0.141193	1
ak8	ENSDARG00000030961	28.1708	16.7431	39.5985	2.36507	1.24188	0.0751985	1
AL935186.1	ENSDARG00000025046	11.5699	6.8942	16.2455	2.35641	1.23659	0.20562	1
got1l1	ENSDARG00000053644	23.1397	13.7884	32.4911	2.35641	1.23659	0.0985729	1
si:dkey-29f21.1	ENSDARG00000095006	11.5699	6.8942	16.2455	2.35641	1.23659	0.20562	1
si:dkeyp-118h3.7	ENSDARG00000094079	29.6786	17.7279	41.6292	2.34822	1.23157	0.0722532	1
aqp3b	ENSDARG00000069518	18.1087	10.8337	25.3837	2.34302	1.22837	0.133756	1
ISX	ENSDARG00000074250	24.6475	14.7733	34.5218	2.33677	1.22452	0.094245	1
hes2.2	ENSDARG00000068168	24.6475	14.7733	34.5218	2.33677	1.22452	0.094245	1
zp2.2	ENSDARG00000091737	24.6475	14.7733	34.5218	2.33677	1.22452	0.094245	1
NXNL1 (2 of 2)	ENSDARG00000096605	13.0777	7.87909	18.2762	2.31959	1.21387	0.191695	1
si:ch211-145h19.4	ENSDARG00000096006	13.0777	7.87909	18.2762	2.31959	1.21387	0.191695	1
tbx5b	ENSDARG00000092060	26.1553	15.7582	36.5525	2.31959	1.21387	0.0901542	1
CR388231.2	ENSDARG00000086979	13.0777	7.87909	18.2762	2.31959	1.21387	0.191695	1
cln5	ENSDARG00000060907	19.6165	11.8186	27.4143	2.31959	1.21387	0.126854	1
si:ch211-176g6.1	ENSDARG00000096522	13.0777	7.87909	18.2762	2.31959	1.21387	0.191695	1
si:ch211-147m20.3	ENSDARG00000094853	13.0777	7.87909	18.2762	2.31959	1.21387	0.191695	1
cfhl5	ENSDARG00000092786	13.0777	7.87909	18.2762	2.31959	1.21387	0.191695	1
si:dkeyp-73d8.13	ENSDARG00000093905	14.5854	8.86397	20.3069	2.29095	1.19595	0.179265	1
ENSDARG00000086059	ENSDARG00000086059	14.5854	8.86397	20.3069	2.29095	1.19595	0.179265	1
ENSDARG00000075723	ENSDARG00000075723	14.5854	8.86397	20.3069	2.29095	1.19595	0.179265	1
si:ch211-270n8.4	ENSDARG00000094423	22.6321	13.7884	31.4757	2.28277	1.19078	0.114478	1
tbx4	ENSDARG00000030058	30.6787	18.7128	42.6445	2.27889	1.18833	0.0791094	1
si:dkey-16p6.4	ENSDARG00000068161	32.1865	19.6977	44.6752	2.26804	1.18145	0.0758008	1
si:ch211-176m18.1	ENSDARG00000075595	16.0932	9.84886	22.3376	2.26804	1.18145	0.168095	1
TRPC7 (1 of 4)	ENSDARG00000027523	32.1865	19.6977	44.6752	2.26804	1.18145	0.0758008	1
si:ch1073-109g21.1	ENSDARG00000091948	17.601	10.8337	24.3683	2.2493	1.16947	0.157998	1
ftr53	ENSDARG00000041220	17.601	10.8337	24.3683	2.2493	1.16947	0.157998	1
CUZD1 (1 of 5)	ENSDARG00000025311	17.601	10.8337	24.3683	2.2493	1.16947	0.157998	1
si:ch1073-15f12.1	ENSDARG00000095870	17.601	10.8337	24.3683	2.2493	1.16947	0.157998	1
TSG101 (5 of 5)	ENSDARG00000096110	17.601	10.8337	24.3683	2.2493	1.16947	0.157998	1
zgc:56628	ENSDARG00000015849	27.1554	16.7431	37.5678	2.24378	1.16593	0.0988876	1
zgc:113691	ENSDARG00000038898	19.1088	11.8186	26.399	2.23368	1.15942	0.148826	1
ptx3b	ENSDARG00000079515	19.1088	11.8186	26.399	2.23368	1.15942	0.148826	1
C6H3orf67	ENSDARG00000026086	19.1088	11.8186	26.399	2.23368	1.15942	0.148826	1
si:dkey-63d15.12	ENSDARG00000075480	20.6166	12.8035	28.4297	2.22046	1.15086	0.140457	1
b3gnt2a	ENSDARG00000052376	33.1866	20.6826	45.6906	2.20913	1.14348	0.082229	1
si:ch211-195h23.4	ENSDARG00000093337	11.0622	6.8942	15.2302	2.20913	1.14348	0.252531	1
FAM150A	ENSDARG00000074387	11.0622	6.8942	15.2302	2.20913	1.14348	0.252531	1
ttc12	ENSDARG00000056896	34.6944	21.6675	47.7213	2.20244	1.1391	0.0786558	1
wdr66	ENSDARG00000059855	36.2022	22.6524	49.752	2.19632	1.13509	0.0752865	1
zgc:113314	ENSDARG00000069453	36.2022	22.6524	49.752	2.19632	1.13509	0.0752865	1
wu:fj40e01	ENSDARG00000014624	12.57	7.87909	17.2609	2.19072	1.13141	0.232401	1
PLD4 (1 of 2)	ENSDARG00000075770	12.57	7.87909	17.2609	2.19072	1.13141	0.232401	1
olfcd3	ENSDARG00000068576	12.57	7.87909	17.2609	2.19072	1.13141	0.232401	1
si:dkey-109j17.4	ENSDARG00000094530	25.14	15.7582	34.5218	2.19072	1.13141	0.119235	1
TDRD12	ENSDARG00000075217	12.57	7.87909	17.2609	2.19072	1.13141	0.232401	1
GPR142	ENSDARG00000015601	14.0778	8.86397	19.2916	2.1764	1.12195	0.215017	1
BX000703.2	ENSDARG00000090743	14.0778	8.86397	19.2916	2.1764	1.12195	0.215017	1
FP236606.1	ENSDARG00000088606	14.0778	8.86397	19.2916	2.1764	1.12195	0.215017	1
VWA3A	ENSDARG00000087210	31.1711	19.6977	42.6445	2.16495	1.11433	0.0975254	1
CR407594.2	ENSDARG00000092757	17.0934	10.8337	23.353	2.15558	1.10807	0.186352	1
OGFR (4 of 5)	ENSDARG00000057933	17.0934	10.8337	23.353	2.15558	1.10807	0.186352	1
CR759791.1	ENSDARG00000061432	17.0934	10.8337	23.353	2.15558	1.10807	0.186352	1
unc93a	ENSDARG00000041554	35.6945	22.6524	48.7366	2.1515	1.10534	0.0846917	1
GPT (4 of 5)	ENSDARG00000087516	18.6011	11.8186	25.3837	2.14777	1.10284	0.174352	1
si:ch211-253d24.2	ENSDARG00000094683	18.6011	11.8186	25.3837	2.14777	1.10284	0.174352	1
CABZ01040021.1	ENSDARG00000091044	18.6011	11.8186	25.3837	2.14777	1.10284	0.174352	1
kcnk3	ENSDARG00000043466	18.6011	11.8186	25.3837	2.14777	1.10284	0.174352	1
SLC22A13	ENSDARG00000059166	37.2023	23.6373	50.7673	2.14777	1.10284	0.080931	1
gbgt1l2	ENSDARG00000092718	20.1089	12.8035	27.4143	2.14116	1.09839	0.163571	1
C6H2orf62	ENSDARG00000063009	40.2179	25.607	54.8287	2.14116	1.09839	0.0740665	1
mir192	ENSDARG00000080041	20.1089	12.8035	27.4143	2.14116	1.09839	0.163571	1
prdm11	ENSDARG00000074468	20.1089	12.8035	27.4143	2.14116	1.09839	0.163571	1
si:dkey-284m18.1	ENSDARG00000096764	29.1557	18.7128	39.5985	2.11612	1.08142	0.116319	1
si:ch211-73m21.2	ENSDARG00000096461	32.1712	20.6826	43.6599	2.11095	1.07789	0.105003	1
dzip1l	ENSDARG00000074265	33.679	21.6675	45.6906	2.10872	1.07636	0.0999247	1
wdr16	ENSDARG00000041321	38.2024	24.6221	51.7827	2.10309	1.07251	0.0866088	1
map3k19	ENSDARG00000094272	38.2024	24.6221	51.7827	2.10309	1.07251	0.0866088	1
C2H10orf67	ENSDARG00000076896	41.218	26.5919	55.844	2.10004	1.07042	0.0790694	1
mir124-5	ENSDARG00000080174	41.218	26.5919	55.844	2.10004	1.07042	0.0790694	1
cyp39a1	ENSDARG00000017982	42.7258	27.5768	57.8747	2.09867	1.06948	0.0756369	1
si:ch211-160d14.9	ENSDARG00000096599	18.0935	11.8186	24.3683	2.06186	1.04394	0.203928	1
RDM1	ENSDARG00000038186	16.5857	10.8337	22.3376	2.06186	1.04394	0.219419	1
si:ch211-222h17.8	ENSDARG00000093924	12.0623	7.87909	16.2455	2.06186	1.04394	0.281183	1
GALNT8 (3 of 5)	ENSDARG00000045851escription=UDP-N-acetyl-alpha-D-galactosamine:polypeptideN-acetylgalactosaminyltransferase 8 (GalNAc-T8)[Source:HGNC Symbol;Acc:4130]	21.109	13.7884	28.4297	2.06186	1.04394	0.177941	1
si:dkey-47k16.3	ENSDARG00000087988	19.6013	12.8035	26.399	2.06186	1.04394	0.190202	1
si:dkey-269o24.2	ENSDARG00000094404	31.6636	20.6826	42.6445	2.06186	1.04394	0.118476	1
CABZ01054405.2	ENSDARG00000089635	12.0623	7.87909	16.2455	2.06186	1.04394	0.281183	1
wu:fb64b08	ENSDARG00000092222	10.5545	6.8942	14.2148	2.06186	1.04394	0.309496	1
CCDC180	ENSDARG00000032372	43.7259	28.5617	58.8901	2.06186	1.04394	0.0803769	1
arhgef15	ENSDARG00000059742	16.5857	10.8337	22.3376	2.06186	1.04394	0.219419	1
si:ch211-30g3.6	ENSDARG00000093839	15.0779	9.84886	20.3069	2.06186	1.04394	0.237067	1
C5H3orf30	ENSDARG00000093783	12.0623	7.87909	16.2455	2.06186	1.04394	0.281183	1
zgc:109913	ENSDARG00000022512	10.5545	6.8942	14.2148	2.06186	1.04394	0.309496	1
jak3	ENSDARG00000010252	15.0779	9.84886	20.3069	2.06186	1.04394	0.237067	1
or109-11	ENSDARG00000087002	34.6791	22.6524	46.7059	2.06186	1.04394	0.106879	1
car15	ENSDARG00000060829	12.0623	7.87909	16.2455	2.06186	1.04394	0.281183	1
zgc:64002	ENSDARG00000086998	10.5545	6.8942	14.2148	2.06186	1.04394	0.309496	1
TRIM14 (27 of 27)	ENSDARG00000096492	16.5857	10.8337	22.3376	2.06186	1.04394	0.219419	1
ENSDARG00000079371	ENSDARG00000079371	18.0935	11.8186	24.3683	2.06186	1.04394	0.203928	1
si:dkey-182i3.9	ENSDARG00000096575	15.0779	9.84886	20.3069	2.06186	1.04394	0.237067	1
AL929092.2	ENSDARG00000090081	12.0623	7.87909	16.2455	2.06186	1.04394	0.281183	1
si:ch211-132b12.1	ENSDARG00000061480	18.0935	11.8186	24.3683	2.06186	1.04394	0.203928	1
trpc6b	ENSDARG00000067730	15.0779	9.84886	20.3069	2.06186	1.04394	0.237067	1
slc39a4	ENSDARG00000059361	16.5857	10.8337	22.3376	2.06186	1.04394	0.219419	1
btr20	ENSDARG00000075603	13.5701	8.86397	18.2762	2.06186	1.04394	0.257405	1
FAM8A1 (2 of 3)	ENSDARG00000017111	12.0623	7.87909	16.2455	2.06186	1.04394	0.281183	1
CABZ01074669.1	ENSDARG00000071028	13.5701	8.86397	18.2762	2.06186	1.04394	0.257405	1
si:dkey-4c15.8	ENSDARG00000092088	13.5701	8.86397	18.2762	2.06186	1.04394	0.257405	1
CR974475.2	ENSDARG00000090107	10.5545	6.8942	14.2148	2.06186	1.04394	0.309496	1
CR936540.2	ENSDARG00000089098	10.5545	6.8942	14.2148	2.06186	1.04394	0.309496	1
dhh	ENSDARG00000037062	18.0935	11.8186	24.3683	2.06186	1.04394	0.203928	1
tor1l3	ENSDARG00000026895	10.5545	6.8942	14.2148	2.06186	1.04394	0.309496	1
XCR1 (4 of 8)	ENSDARG00000054846	10.5545	6.8942	14.2148	2.06186	1.04394	0.309496	1
ENSDARG00000091446	ENSDARG00000091446	10.5545	6.8942	14.2148	2.06186	1.04394	0.309496	1
C25H19orf40	ENSDARG00000051731	21.109	13.7884	28.4297	2.06186	1.04394	0.177941	1
si:dkey-13a21.4	ENSDARG00000026098	43.2182	28.5617	57.8747	2.02631	1.01885	0.0891563	1
si:ch211-132b12.2	ENSDARG00000094946	40.2026	26.5919	53.8133	2.02367	1.01698	0.0980173	1
gaa	ENSDARG00000090714	38.6948	25.607	51.7827	2.0222	1.01593	0.102917	1
si:ch211-155o21.3	ENSDARG00000086518	34.1715	22.6524	45.6906	2.01703	1.01223	0.11989	1
aqp8b	ENSDARG00000015512	31.1559	20.6826	41.6292	2.01276	1.00918	0.133532	1
SPAG17	ENSDARG00000058280	29.6481	19.6977	39.5985	2.01031	1.00742	0.141218	1
zte25	ENSDARG00000079983	29.6481	19.6977	39.5985	2.01031	1.00742	0.141218	1
ccdc65	ENSDARG00000032005	28.1403	18.7128	37.5678	2.0076	1.00547	0.149575	1
sync	ENSDARG00000035944	26.6325	17.7279	35.5371	2.00458	1.0033	0.158693	1
si:dkey-249p7.3	ENSDARG00000096617	53.2651	35.4559	71.0742	2.00458	1.0033	0.0720424	1
USH1G (1 of 2)	ENSDARG00000004322	25.1247	16.7431	33.5064	2.00121	1.00087	0.168682	1
PSTPIP2 (1 of 2)	ENSDARG00000053443	25.1247	16.7431	33.5064	2.00121	1.00087	0.168682	1
TMEM150B	ENSDARG00000056144	47.2339	31.5163	62.9515	1.99742	0.99814	0.0858931	1
syt1b	ENSDARG00000042350	23.617	15.7582	31.4757	1.99742	0.99814	0.179695	1
tcf19l	ENSDARG00000040036	47.2339	31.5163	62.9515	1.99742	0.99814	0.0858931	1
aanat1	ENSDARG00000036567	45.7261	30.5315	60.9208	1.99534	0.996638	0.0899242	1
si:ch211-152l15.2	ENSDARG00000093478	22.1092	14.7733	29.445	1.99313	0.995034	0.191903	1
upk3l	ENSDARG00000092872	22.1092	14.7733	29.445	1.99313	0.995034	0.191903	1
si:dkey-272j9.4	ENSDARG00000093038	22.1092	14.7733	29.445	1.99313	0.995034	0.191903	1
CABZ01043017.1	ENSDARG00000001937	22.1092	14.7733	29.445	1.99313	0.995034	0.191903	1
zgc:174259	ENSDARG00000091136	20.6014	13.7884	27.4143	1.98822	0.991476	0.205516	1
STYK1 (2 of 3)	ENSDARG00000070950	20.6014	13.7884	27.4143	1.98822	0.991476	0.205516	1
CABZ01055343.4	ENSDARG00000089208	20.6014	13.7884	27.4143	1.98822	0.991476	0.205516	1
acer1	ENSDARG00000010347	39.695	26.5919	52.798	1.98549	0.989496	0.108991	1
tnfsf11	ENSDARG00000068141	19.0936	12.8035	25.3837	1.98255	0.98736	0.220799	1
gig2e	ENSDARG00000075757	19.0936	12.8035	25.3837	1.98255	0.98736	0.220799	1
SLC16A5 (1 of 2)	ENSDARG00000013552	17.5858	11.8186	23.353	1.97595	0.982543	0.238097	1
FP016207.1	ENSDARG00000087256	17.5858	11.8186	23.353	1.97595	0.982543	0.238097	1
LRRC10B	ENSDARG00000063569	17.5858	11.8186	23.353	1.97595	0.982543	0.238097	1
tdrd7	ENSDARG00000032808	16.078	10.8337	21.3223	1.96813	0.976829	0.25786	1
AL935184.2	ENSDARG00000091332	16.078	10.8337	21.3223	1.96813	0.976829	0.25786	1
GPR141 (2 of 2)	ENSDARG00000077026	16.078	10.8337	21.3223	1.96813	0.976829	0.25786	1
zgc:109982	ENSDARG00000052620	32.156	21.6675	42.6445	1.96813	0.976829	0.142008	1
BPIFC	ENSDARG00000088486	16.078	10.8337	21.3223	1.96813	0.976829	0.25786	1
mir122	ENSDARG00000083634	16.078	10.8337	21.3223	1.96813	0.976829	0.25786	1
si:ch73-60p2.1	ENSDARG00000092125	16.078	10.8337	21.3223	1.96813	0.976829	0.25786	1
CABZ01079541.1	ENSDARG00000090860	14.5702	9.84886	19.2916	1.95876	0.969943	0.280699	1
TRIM14 (10 of 27)	ENSDARG00000089468	14.5702	9.84886	19.2916	1.95876	0.969943	0.280699	1
si:dkey-156j15.1	ENSDARG00000092329	14.5702	9.84886	19.2916	1.95876	0.969943	0.280699	1
ttll2	ENSDARG00000077853	14.5702	9.84886	19.2916	1.95876	0.969943	0.280699	1
lim2.2	ENSDARG00000059015	14.5702	9.84886	19.2916	1.95876	0.969943	0.280699	1
si:dkeyp-79f12.7	ENSDARG00000094050	14.5702	9.84886	19.2916	1.95876	0.969943	0.280699	1
si:ch211-190o19.1	ENSDARG00000093735	14.5702	9.84886	19.2916	1.95876	0.969943	0.280699	1
tas1r3	ENSDARG00000006341	55.2653	37.4257	73.1049	1.95334	0.965941	0.0793946	1
rpp21	ENSDARG00000043404	55.2653	37.4257	73.1049	1.95334	0.965941	0.0793946	1
peli1a	ENSDARG00000091592	52.2497	35.4559	69.0435	1.94731	0.961481	0.0867036	1
BX005085.3	ENSDARG00000089947	13.0624	8.86397	17.2609	1.94731	0.961481	0.307463	1
CR388013.3	ENSDARG00000094008	13.0624	8.86397	17.2609	1.94731	0.961481	0.307463	1
BX284672.1	ENSDARG00000079924	26.1249	17.7279	34.5218	1.94731	0.961481	0.180164	1
BX004828.1	ENSDARG00000077954	13.0624	8.86397	17.2609	1.94731	0.961481	0.307463	1
zgc:173994	ENSDARG00000029473	39.1873	26.5919	51.7827	1.94731	0.961481	0.121083	1
katnal2	ENSDARG00000012275	13.0624	8.86397	17.2609	1.94731	0.961481	0.307463	1
mir21-1	ENSDARG00000082187	13.0624	8.86397	17.2609	1.94731	0.961481	0.307463	1
ENSDARG00000037617	ENSDARG00000037617	13.0624	8.86397	17.2609	1.94731	0.961481	0.307463	1
ENDOD1 (6 of 15)	ENSDARG00000070242	26.1249	17.7279	34.5218	1.94731	0.961481	0.180164	1
nsl1	ENSDARG00000024471	26.1249	17.7279	34.5218	1.94731	0.961481	0.180164	1
C5H5orf34	ENSDARG00000092445	24.6171	16.7431	32.4911	1.94057	0.956481	0.192144	1
FETUB (2 of 3)	ENSDARG00000070892	24.6171	16.7431	32.4911	1.94057	0.956481	0.192144	1
sult1st5	ENSDARG00000003475	60.7888	41.3652	80.2123	1.93913	0.955407	0.0731248	1
si:dkey-106c17.2	ENSDARG00000094994	23.1093	15.7582	30.4604	1.93299	0.950834	0.20544	1
mir142b	ENSDARG00000082467	11.5546	7.87909	15.2302	1.93299	0.950834	0.339382	1
KCNN4 (2 of 2)	ENSDARG00000086091	11.5546	7.87909	15.2302	1.93299	0.950834	0.339382	1
CABZ01090124.1	ENSDARG00000087877	11.5546	7.87909	15.2302	1.93299	0.950834	0.339382	1
CU463157.1	ENSDARG00000056845	23.1093	15.7582	30.4604	1.93299	0.950834	0.20544	1
FP102169.1	ENSDARG00000089210	11.5546	7.87909	15.2302	1.93299	0.950834	0.339382	1
BX324210.1	ENSDARG00000088348	44.7108	30.5315	58.8901	1.92883	0.947728	0.109557	1
CABZ01058139.1	ENSDARG00000090877	33.1561	22.6524	43.6599	1.92739	0.946646	0.150379	1
rsph4a	ENSDARG00000067606	43.203	29.5466	56.8594	1.9244	0.944408	0.115115	1
cdkn2c	ENSDARG00000057610	21.6015	14.7733	28.4297	1.9244	0.944408	0.220282	1
csf1a	ENSDARG00000075343	43.203	29.5466	56.8594	1.9244	0.944408	0.115115	1
si:ch73-52p7.1	ENSDARG00000095184	21.6015	14.7733	28.4297	1.9244	0.944408	0.220282	1
si:dkey-15h14.4	ENSDARG00000092348	10.0469	6.8942	13.1995	1.91458	0.937028	0.378317	1
blvra	ENSDARG00000059857	40.1874	27.5768	52.798	1.91458	0.937028	0.127487	1
si:ch211-222j14.1	ENSDARG00000094642	10.0469	6.8942	13.1995	1.91458	0.937028	0.378317	1
si:ch211-285c6.2	ENSDARG00000079234	10.0469	6.8942	13.1995	1.91458	0.937028	0.378317	1
si:ch211-206i14.2	ENSDARG00000035796	10.0469	6.8942	13.1995	1.91458	0.937028	0.378317	1
CR774179.2	ENSDARG00000088911	20.0937	13.7884	26.399	1.91458	0.937028	0.236961	1
mst1rb	ENSDARG00000004871	10.0469	6.8942	13.1995	1.91458	0.937028	0.378317	1
BX248230.1	ENSDARG00000012496	10.0469	6.8942	13.1995	1.91458	0.937028	0.378317	1
CCDC176 (1 of 2)	ENSDARG00000062924	20.0937	13.7884	26.399	1.91458	0.937028	0.236961	1
GPR113	ENSDARG00000087870	10.0469	6.8942	13.1995	1.91458	0.937028	0.378317	1
ftr55	ENSDARG00000009161	10.0469	6.8942	13.1995	1.91458	0.937028	0.378317	1
si:dkeyp-100a5.3	ENSDARG00000095681	10.0469	6.8942	13.1995	1.91458	0.937028	0.378317	1
si:ch211-210c8.5	ENSDARG00000093922	60.2811	41.3652	79.197	1.91458	0.937028	0.0796334	1
si:ch211-224b1.4	ENSDARG00000068021	48.7265	33.4861	63.9668	1.91025	0.93376	0.104312	1
ccdc173	ENSDARG00000077928	28.6328	19.6977	37.5678	1.90722	0.931469	0.179683	1
BX936420.1	ENSDARG00000089021	64.2968	44.3199	84.2737	1.90149	0.92713	0.0763232	1
gfi1ab	ENSDARG00000044457	64.2968	44.3199	84.2737	1.90149	0.92713	0.0763232	1
C6H22orf23	ENSDARG00000052428	45.7109	31.5163	59.9054	1.90077	0.926586	0.114911	1
si:dkey-270e21.6	ENSDARG00000094464	27.125	18.7128	35.5371	1.89908	0.925299	0.191368	1
BX323448.1	ENSDARG00000037256	25.6172	17.7279	33.5064	1.89003	0.918412	0.20425	1
si:ch211-239f4.4	ENSDARG00000095108	17.0781	11.8186	22.3376	1.89003	0.918412	0.27744	1
si:ch73-137d22.1	ENSDARG00000039257	17.0781	11.8186	22.3376	1.89003	0.918412	0.27744	1
si:dkey-111e8.5	ENSDARG00000093960	25.6172	17.7279	33.5064	1.89003	0.918412	0.20425	1
CR339057.1	ENSDARG00000094877	17.0781	11.8186	22.3376	1.89003	0.918412	0.27744	1
bhlha15	ENSDARG00000045166	25.6172	17.7279	33.5064	1.89003	0.918412	0.20425	1
NSMCE2	ENSDARG00000076379	51.2344	35.4559	67.0128	1.89003	0.918412	0.104064	1
si:dkey-14o18.7	ENSDARG00000094748	17.0781	11.8186	22.3376	1.89003	0.918412	0.27744	1
si:ch211-13o20.2	ENSDARG00000095240	25.6172	17.7279	33.5064	1.89003	0.918412	0.20425	1
CCDC178	ENSDARG00000090429	17.0781	11.8186	22.3376	1.89003	0.918412	0.27744	1
CR762436.1	ENSDARG00000032637	17.0781	11.8186	22.3376	1.89003	0.918412	0.27744	1
nxnl2	ENSDARG00000003934	66.8047	46.2896	87.3198	1.88638	0.915619	0.0762131	1
C24H8orf33	ENSDARG00000038556	49.7266	34.471	64.9822	1.88513	0.91466	0.109103	1
CCDC176 (2 of 2)	ENSDARG00000068855	41.1875	28.5617	53.8133	1.88411	0.913883	0.133847	1
CCDC50 (4 of 4)	ENSDARG00000094493	41.1875	28.5617	53.8133	1.88411	0.913883	0.133847	1
si:ch73-91k6.1	ENSDARG00000096688	32.6485	22.6524	42.6445	1.88256	0.912699	0.168136	1
si:dkey-256e7.5	ENSDARG00000092600	24.1094	16.7431	31.4757	1.87993	0.910677	0.218543	1
si:dkey-16n15.6	ENSDARG00000095805	39.6797	27.5768	51.7827	1.87776	0.909014	0.14114	1
si:dkey-261l7.2	ENSDARG00000094345	39.6797	27.5768	51.7827	1.87776	0.909014	0.14114	1
CTTNBP2NL (1 of 2)	ENSDARG00000053179	55.2501	38.4105	72.0896	1.87682	0.908288	0.0990121	1
slc31a2	ENSDARG00000076092	70.8204	49.2443	92.3965	1.87629	0.907882	0.0730107	1
CELA1 (7 of 7)	ENSDARG00000095462	70.8204	49.2443	92.3965	1.87629	0.907882	0.0730107	1
CR848761.1	ENSDARG00000094327	15.5703	10.8337	20.3069	1.87441	0.90644	0.302382	1
si:ch211-223o1.2	ENSDARG00000087830	15.5703	10.8337	20.3069	1.87441	0.90644	0.302382	1
si:dkey-220o10.1	ENSDARG00000092448	69.3126	48.2594	90.3658	1.8725	0.904967	0.0760238	1
si:ch211-209j10.6	ENSDARG00000093317	53.7423	37.4257	70.0589	1.87195	0.90454	0.103657	1
si:ch73-7i4.1	ENSDARG00000094554	38.1719	26.5919	49.752	1.87094	0.903766	0.149013	1
zgc:103519	ENSDARG00000079272	60.7735	42.3501	79.197	1.87006	0.903081	0.0902312	1
CT573468.1	ENSDARG00000090120	22.6016	15.7582	29.445	1.86856	0.901924	0.234497	1
CR853282.1	ENSDARG00000061455	45.2032	31.5163	58.8901	1.86856	0.901924	0.126414	1
si:dkey-250k15.7	ENSDARG00000095048	22.6016	15.7582	29.445	1.86856	0.901924	0.234497	1
CABZ01109105.1	ENSDARG00000090525	29.6329	20.6826	38.5832	1.86549	0.899553	0.189834	1
ncf1	ENSDARG00000033735	66.297	46.2896	86.3044	1.86444	0.898745	0.0825421	1
zgc:173708	ENSDARG00000087510	43.6954	30.5315	56.8594	1.86232	0.897102	0.133036	1
sowahcb	ENSDARG00000059582	64.7892	45.3047	84.2737	1.86015	0.895421	0.0860822	1
CLRN2	ENSDARG00000070321	21.0938	14.7733	27.4143	1.85567	0.89194	0.252423	1
si:dkeyp-120g4.1	ENSDARG00000079526	14.0625	9.84886	18.2762	1.85567	0.89194	0.331577	1
si:dkey-257e4.5	ENSDARG00000092861	21.0938	14.7733	27.4143	1.85567	0.89194	0.252423	1
SLC2A11	ENSDARG00000053961	42.1876	29.5466	54.8287	1.85567	0.89194	0.140155	1
si:dkey-53f14.2	ENSDARG00000092441	14.0625	9.84886	18.2762	1.85567	0.89194	0.331577	1
si:ch211-198b21.6	ENSDARG00000094419	21.0938	14.7733	27.4143	1.85567	0.89194	0.252423	1
CU633857.1	ENSDARG00000089569	28.1251	19.6977	36.5525	1.85567	0.89194	0.202282	1
si:ch211-152f22.2	ENSDARG00000096719	14.0625	9.84886	18.2762	1.85567	0.89194	0.331577	1
UBXN11	ENSDARG00000053828	21.0938	14.7733	27.4143	1.85567	0.89194	0.252423	1
si:ch1073-221c23.2	ENSDARG00000095765	14.0625	9.84886	18.2762	1.85567	0.89194	0.331577	1
C21H11orf70	ENSDARG00000000349	14.0625	9.84886	18.2762	1.85567	0.89194	0.331577	1
cyb561d2	ENSDARG00000044114	28.1251	19.6977	36.5525	1.85567	0.89194	0.202282	1
si:ch211-197n1.2	ENSDARG00000042937	40.6798	28.5617	52.798	1.84856	0.886402	0.147825	1
rsg1	ENSDARG00000028442	33.6486	23.6373	43.6599	1.84708	0.885246	0.176811	1
si:ch211-220b11.4	ENSDARG00000095182	26.6173	18.7128	34.5218	1.84482	0.883479	0.216006	1
rab36	ENSDARG00000014058	26.6173	18.7128	34.5218	1.84482	0.883479	0.216006	1
si:dkey-40m6.15	ENSDARG00000093710	53.2346	37.4257	69.0435	1.84482	0.883479	0.113138	1
zgc:110782	ENSDARG00000044544	26.6173	18.7128	34.5218	1.84482	0.883479	0.216006	1
ENSDARG00000075785	ENSDARG00000075785	39.1721	27.5768	50.7673	1.84094	0.880445	0.156103	1
wnt2bb	ENSDARG00000032234	19.586	13.7884	25.3837	1.84094	0.880445	0.272711	1
steap3	ENSDARG00000075641	19.586	13.7884	25.3837	1.84094	0.880445	0.272711	1
RETSAT (2 of 2)	ENSDARG00000070140	32.1408	22.6524	41.6292	1.83774	0.877933	0.187764	1
cdx1a	ENSDARG00000087811	32.1408	22.6524	41.6292	1.83774	0.877933	0.187764	1
si:dkey-270e21.5	ENSDARG00000093731	32.1408	22.6524	41.6292	1.83774	0.877933	0.187764	1
efcab11	ENSDARG00000043740	44.6955	31.5163	57.8747	1.83634	0.876833	0.138951	1
si:ch211-106j21.4	ENSDARG00000092108	25.1095	17.7279	32.4911	1.83276	0.874018	0.23121	1
C5H2orf68	ENSDARG00000059459	37.6643	26.5919	48.7366	1.83276	0.874018	0.165058	1
CABZ01066695.1	ENSDARG00000091603	12.5548	8.86397	16.2455	1.83276	0.874018	0.366299	1
hsd17b3	ENSDARG00000023287	12.5548	8.86397	16.2455	1.83276	0.874018	0.366299	1
hes2.1	ENSDARG00000074897	12.5548	8.86397	16.2455	1.83276	0.874018	0.366299	1
si:ch211-165b19.11	ENSDARG00000093189	12.5548	8.86397	16.2455	1.83276	0.874018	0.366299	1
CU302319.2	ENSDARG00000076237	12.5548	8.86397	16.2455	1.83276	0.874018	0.366299	1
MAL (3 of 3)	ENSDARG00000070401	12.5548	8.86397	16.2455	1.83276	0.874018	0.366299	1
cenpo	ENSDARG00000075619	37.6643	26.5919	48.7366	1.83276	0.874018	0.165058	1
zgc:162972	ENSDARG00000076134	12.5548	8.86397	16.2455	1.83276	0.874018	0.366299	1
tekt2	ENSDARG00000028973	25.1095	17.7279	32.4911	1.83276	0.874018	0.23121	1
slc10a1	ENSDARG00000030588	48.7112	34.471	62.9515	1.82622	0.868857	0.130834	1
si:dkeyp-7b3.1	ENSDARG00000092935	36.1565	25.607	46.7059	1.82395	0.867066	0.174768	1
ZNF337 (9 of 39)	ENSDARG00000086182	18.0782	12.8035	23.353	1.82395	0.867066	0.29587	1
crygs2	ENSDARG00000041171	18.0782	12.8035	23.353	1.82395	0.867066	0.29587	1
SLC35F2 (2 of 2)	ENSDARG00000090686	18.0782	12.8035	23.353	1.82395	0.867066	0.29587	1
lsm10	ENSDARG00000094513	18.0782	12.8035	23.353	1.82395	0.867066	0.29587	1
SLC46A2	ENSDARG00000075229	23.6017	16.7431	30.4604	1.81928	0.863371	0.24817	1
GPT (5 of 5)	ENSDARG00000089721	23.6017	16.7431	30.4604	1.81928	0.863371	0.24817	1
si:dkey-45k15.1	ENSDARG00000061714	52.7269	37.4257	68.0282	1.81769	0.862105	0.123398	1
CRFA31.2	ENSDARG00000074992	34.6487	24.6221	44.6752	1.81443	0.859519	0.185325	1
ostf1	ENSDARG00000091555	69.2974	49.2443	89.3505	1.81443	0.859519	0.091939	1
kl	ENSDARG00000079862	34.6487	24.6221	44.6752	1.81443	0.859519	0.185325	1
CABZ01007930.1	ENSDARG00000087805	62.2661	44.3199	80.2123	1.80985	0.855871	0.10548	1
prr15lb	ENSDARG00000029308	62.2661	44.3199	80.2123	1.80985	0.855871	0.10548	1
acrc	ENSDARG00000057716	84.36	60.078	108.642	1.80835	0.854673	0.0733331	1
si:ch211-214j24.15	ENSDARG00000063481	44.1879	31.5163	56.8594	1.80412	0.851298	0.152598	1
si:dkey-202b22.5	ENSDARG00000073965	16.5704	11.8186	21.3223	1.80412	0.851298	0.322573	1
BX255935.3	ENSDARG00000094292	16.5704	11.8186	21.3223	1.80412	0.851298	0.322573	1
TRIM14 (24 of 27)	ENSDARG00000096038	27.6174	19.6977	35.5371	1.80412	0.851298	0.227401	1
si:dkeyp-44b5.3	ENSDARG00000096485	11.047	7.87909	14.2148	1.80412	0.851298	0.408438	1
CR762475.2	ENSDARG00000087091	16.5704	11.8186	21.3223	1.80412	0.851298	0.322573	1
si:ch211-211i20.1	ENSDARG00000092687	22.0939	15.7582	28.4297	1.80412	0.851298	0.267204	1
shisa2	ENSDARG00000034138	11.047	7.87909	14.2148	1.80412	0.851298	0.408438	1
FGD5 (2 of 2)	ENSDARG00000089622	16.5704	11.8186	21.3223	1.80412	0.851298	0.322573	1
emc4	ENSDARG00000039268	71.8053	51.2141	92.3965	1.80412	0.851298	0.0911858	1
CABZ01072252.1	ENSDARG00000086729	16.5704	11.8186	21.3223	1.80412	0.851298	0.322573	1
CABZ01080471.1	ENSDARG00000089798	11.047	7.87909	14.2148	1.80412	0.851298	0.408438	1
mir194a	ENSDARG00000080851	11.047	7.87909	14.2148	1.80412	0.851298	0.408438	1
smtlb	ENSDARG00000017251	11.047	7.87909	14.2148	1.80412	0.851298	0.408438	1
CU929163.1	ENSDARG00000088982	11.047	7.87909	14.2148	1.80412	0.851298	0.408438	1
C11H3orf14	ENSDARG00000086324	27.6174	19.6977	35.5371	1.80412	0.851298	0.227401	1
BX072532.4	ENSDARG00000092778	11.047	7.87909	14.2148	1.80412	0.851298	0.408438	1
si:zfos-911d5.4	ENSDARG00000096738	11.047	7.87909	14.2148	1.80412	0.851298	0.408438	1
CR382327.4	ENSDARG00000088739	11.047	7.87909	14.2148	1.80412	0.851298	0.408438	1
si:ch1073-39g8.1	ENSDARG00000096174	11.047	7.87909	14.2148	1.80412	0.851298	0.408438	1
stx2a	ENSDARG00000004618	66.2818	47.2745	85.2891	1.80412	0.851298	0.100082	1
si:dkey-3k20.1	ENSDARG00000092274	11.047	7.87909	14.2148	1.80412	0.851298	0.408438	1
si:ch73-168d20.1	ENSDARG00000039900	11.047	7.87909	14.2148	1.80412	0.851298	0.408438	1
nlrc3	ENSDARG00000061564	16.5704	11.8186	21.3223	1.80412	0.851298	0.322573	1
zgc:110434	ENSDARG00000051770	11.047	7.87909	14.2148	1.80412	0.851298	0.408438	1
zgc:198329	ENSDARG00000076981	75.821	54.1687	97.4732	1.79944	0.847546	0.0867371	1
RSPH10B	ENSDARG00000051891	64.774	46.2896	83.2584	1.79864	0.846907	0.104514	1
IQCG	ENSDARG00000068678	64.774	46.2896	83.2584	1.79864	0.846907	0.104514	1
CABZ01087111.1	ENSDARG00000087923	48.2036	34.471	61.9361	1.79676	0.845398	0.143102	1
si:dkey-57c15.9	ENSDARG00000093642	48.2036	34.471	61.9361	1.79676	0.845398	0.143102	1
agtrap	ENSDARG00000077082	68.7897	49.2443	88.3351	1.79381	0.843031	0.0991745	1
CR354540.1	ENSDARG00000004051	31.6331	22.6524	40.6138	1.79292	0.842309	0.209421	1
VSTM5	ENSDARG00000079795	31.6331	22.6524	40.6138	1.79292	0.842309	0.209421	1
dctd	ENSDARG00000036990	89.3758	64.0176	114.734	1.79223	0.841754	0.0720766	1
snx8a	ENSDARG00000074842	89.3758	64.0176	114.734	1.79223	0.841754	0.0720766	1
ENSDARG00000087659	ENSDARG00000087659	26.1096	18.7128	33.5064	1.79056	0.84041	0.243448	1
b3gnt9	ENSDARG00000041616	26.1096	18.7128	33.5064	1.79056	0.84041	0.243448	1
ticam1	ENSDARG00000042714	26.1096	18.7128	33.5064	1.79056	0.84041	0.243448	1
cdh23	ENSDARG00000094454	67.2819	48.2594	86.3044	1.78834	0.838624	0.103502	1
kdm8	ENSDARG00000037844	41.1723	29.5466	52.798	1.78694	0.837492	0.170011	1
pglyrp2	ENSDARG00000062998	41.1723	29.5466	52.798	1.78694	0.837492	0.170011	1
THAP6 (2 of 2)	ENSDARG00000056213	20.5861	14.7733	26.399	1.78694	0.837492	0.288715	1
C6H1orf146	ENSDARG00000075814	76.8211	55.1536	98.4886	1.78571	0.836501	0.0894929	1
si:ch211-191i18.4	ENSDARG00000095328	56.2349	40.3803	72.0896	1.78527	0.836138	0.12665	1
knstrn	ENSDARG00000074379	91.8838	65.9873	117.78	1.78489	0.835835	0.0714138	1
zgc:194392	ENSDARG00000074809	91.8838	65.9873	117.78	1.78489	0.835835	0.0714138	1
CABZ01046997.2	ENSDARG00000073901	15.0627	10.8337	19.2916	1.78069	0.832439	0.353731	1
si:dkey-256e21.1	ENSDARG00000095471	15.0627	10.8337	19.2916	1.78069	0.832439	0.353731	1
C5H11orf88	ENSDARG00000075714	30.1253	21.6675	38.5832	1.78069	0.832439	0.22323	1
si:ch211-30g3.4	ENSDARG00000094431	30.1253	21.6675	38.5832	1.78069	0.832439	0.22323	1
CR407547.1	ENSDARG00000089998	30.1253	21.6675	38.5832	1.78069	0.832439	0.22323	1
si:dkey-29b11.3	ENSDARG00000087388	15.0627	10.8337	19.2916	1.78069	0.832439	0.353731	1
CR626874.1	ENSDARG00000091468	15.0627	10.8337	19.2916	1.78069	0.832439	0.353731	1
si:dkey-17e16.15	ENSDARG00000094217	75.3133	54.1687	96.4579	1.78069	0.832439	0.0932399	1
BX664625.1	ENSDARG00000043131	15.0627	10.8337	19.2916	1.78069	0.832439	0.353731	1
CORO2A (2 of 2)	ENSDARG00000095969	15.0627	10.8337	19.2916	1.78069	0.832439	0.353731	1
SLC39A14	ENSDARG00000090174	69.7898	50.2292	89.3505	1.77886	0.83095	0.102449	1
si:ch211-194h1.1	ENSDARG00000092729	24.6018	17.7279	31.4757	1.77549	0.828215	0.261312	1
neurog1	ENSDARG00000056130	24.6018	17.7279	31.4757	1.77549	0.828215	0.261312	1
pot1	ENSDARG00000079915	73.8055	53.1838	94.4272	1.77549	0.828215	0.0971841	1
ankrd45	ENSDARG00000011326	34.141	24.6221	43.6599	1.7732	0.826352	0.205707	1
si:dkeyp-35e5.1	ENSDARG00000092824	68.282	49.2443	87.3198	1.7732	0.826352	0.10692	1
si:dkeyp-33e11.3	ENSDARG00000093396	34.141	24.6221	43.6599	1.7732	0.826352	0.205707	1
myct1	ENSDARG00000056125	34.141	24.6221	43.6599	1.7732	0.826352	0.205707	1
her8.2	ENSDARG00000069675	43.6802	31.5163	55.844	1.77191	0.825303	0.167432	1
hoxb13a	ENSDARG00000056015	53.2194	38.4105	68.0282	1.77108	0.82463	0.139419	1
spef2	ENSDARG00000042913	62.7585	45.3047	80.2123	1.77051	0.824162	0.118089	1
myo1hb	ENSDARG00000078603	66.7742	48.2594	85.2891	1.7673	0.821551	0.111648	1
rad51c	ENSDARG00000068919	38.1567	27.5768	48.7366	1.7673	0.821551	0.190366	1
st6galnac1.2	ENSDARG00000043816	38.1567	27.5768	48.7366	1.7673	0.821551	0.190366	1
CABZ01080492.1	ENSDARG00000079243	19.0784	13.7884	24.3683	1.7673	0.821551	0.313218	1
blf	ENSDARG00000043126	19.0784	13.7884	24.3683	1.7673	0.821551	0.313218	1
s1pr3a	ENSDARG00000042470	19.0784	13.7884	24.3683	1.7673	0.821551	0.313218	1
CR759791.3	ENSDARG00000088052	19.0784	13.7884	24.3683	1.7673	0.821551	0.313218	1
si:dkey-254e13.13	ENSDARG00000096100	32.6332	23.6373	41.6292	1.76117	0.816533	0.218854	1
ENSDARG00000093521	ENSDARG00000093521	32.6332	23.6373	41.6292	1.76117	0.816533	0.218854	1
tbata	ENSDARG00000067831	32.6332	23.6373	41.6292	1.76117	0.816533	0.218854	1
BX950859.2	ENSDARG00000076952	55.7273	40.3803	71.0742	1.76012	0.815674	0.137502	1
srek1ip1	ENSDARG00000043728	78.8213	57.1234	100.519	1.75969	0.815319	0.0950052	1
si:dkey-24i24.3	ENSDARG00000088452	23.094	16.7431	29.445	1.75864	0.814462	0.28133	1
swi5	ENSDARG00000078492	59.743	43.335	76.151	1.75726	0.81333	0.129372	1
dok1a	ENSDARG00000078108	36.6489	26.5919	46.7059	1.7564	0.812618	0.201862	1
si:ch211-108c6.2	ENSDARG00000090682	27.1097	19.6977	34.5218	1.75258	0.809478	0.255255	1
rnf32	ENSDARG00000060035	13.5549	9.84886	17.2609	1.75258	0.809478	0.390617	1
SNORA26	ENSDARG00000085485	27.1097	19.6977	34.5218	1.75258	0.809478	0.255255	1
CD274	ENSDARG00000059310	13.5549	9.84886	17.2609	1.75258	0.809478	0.390617	1
fam173b	ENSDARG00000033451	62.2509	45.3047	79.197	1.7481	0.805784	0.127608	1
si:dkeyp-51b9.3	ENSDARG00000092379	31.1254	22.6524	39.5985	1.7481	0.805784	0.233267	1
si:dkey-176g1.6	ENSDARG00000096270	79.8214	58.1083	101.535	1.74734	0.805156	0.0977595	1
LRRC52 (2 of 2)	ENSDARG00000094255	17.5706	12.8035	22.3376	1.74465	0.802935	0.341388	1
si:dkey-89j23.3	ENSDARG00000093429	35.1411	25.607	44.6752	1.74465	0.802935	0.214379	1
CABZ01074298.1	ENSDARG00000087767	17.5706	12.8035	22.3376	1.74465	0.802935	0.341388	1
aqp10a	ENSDARG00000007086	87.8528	64.0176	111.688	1.74465	0.802935	0.0880253	1
upk1a	ENSDARG00000021866	17.5706	12.8035	22.3376	1.74465	0.802935	0.341388	1
rad51b	ENSDARG00000037046	39.1568	28.5617	49.752	1.74191	0.800672	0.197956	1
C3H16orf89	ENSDARG00000075345	21.5863	15.7582	27.4143	1.73969	0.798831	0.303906	1
[truncated: 19,800 more rows]
